# Supplementary material for: Allergen Content of Therapeutic Preparations for Allergen-Specific Immunotherapy of European Paper Wasp Venom Allergy
Source: MDPI journal article supplement (doi:10.3390/toxins14040284), 2022-04-15
Supplement: s1 [file s1]

# Supplementary Materials: Allergen Content of Therapeutic Preparations for Allergen-Specific Immunotherapy of European Paper Wasp Venom Allergy

Johannes Grosch, Antoine Lesur, Stéphanie Kler, François Bernardin, Gunnar Dittmar, Elisabetta Francescato, Simon J. Hewings, Constanze A. Jakwerth, Ulrich M. Zissler, Matthew D. Heath, Markus Ollert, Matthias F. Kramer, Christiane Hilger, Maria Beatrice Bilò, Carsten B. Schmidt-Weber and Simon Blank

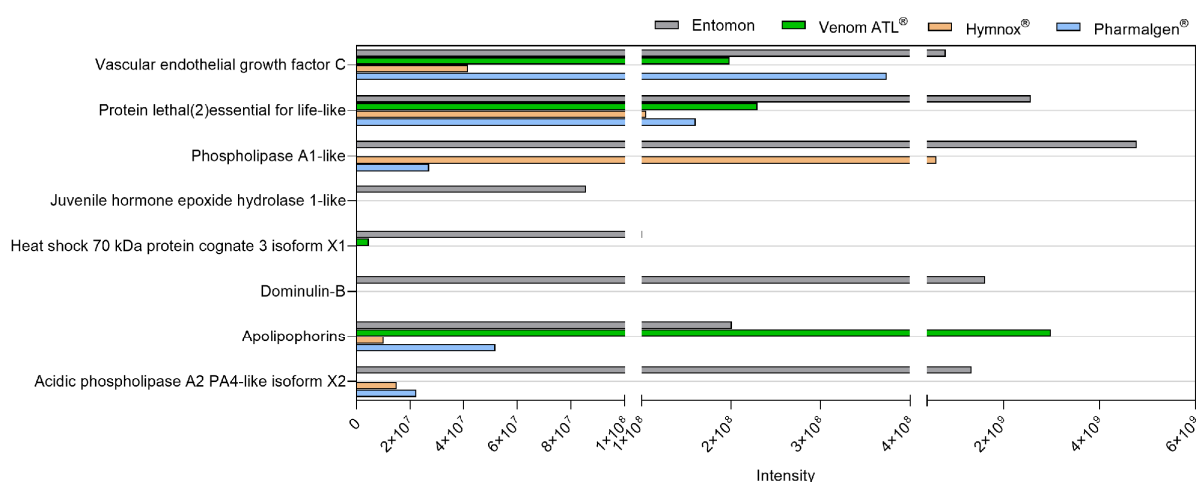

**Figure S1.** Analysis of *P. dominula* venom-containing therapeutic venom preparations by LC-MS/MS. Quantitative comparison of the amounts of proteins, which are not annotated as allergens, but identified as 'true venom components'.

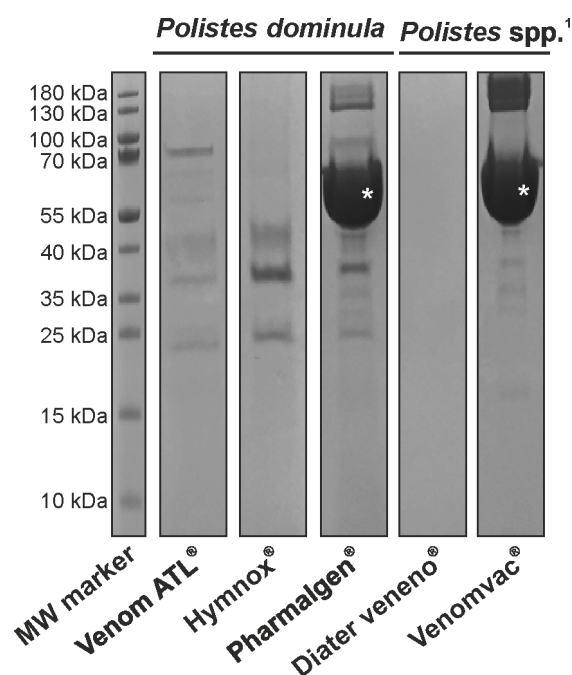

**Figure S2.** SDS-PAGE analysis of *Polistes* venom-containing therapeutic preparations. Analysis of a second vial from the same package of the batches of five different therapeutic *Polistes* venom preparations analysed in Figure 3a. The analysis was performed in a different laboratory by another operator. The lyophilized products were freshly reconstituted with ddH<sub>2</sub>O and a total of 15 µg (according to the specifications of the manufacturers) venom were separated based on their molecular weight using freshly casted Tris-Tricine gels and visualized by Coomassie blue staining. White asterisks indicate the band of human serum albumin contained in some of the venom preparations. <sup>1</sup>*Polistes* spp. venom contains a mix of venoms from different American *Polistes* species such as *P. fuscatus*, *P. metricus*, *P. exclamans*, and *P. annularis*. MW, molecular weight; SDS-PAGE, sodium dodecyl sulfate polyacrylamide gel electrophoresis.

**Table S1.** All identified protein groups including unique identifier for each protein, FASTA headers and intensities. Protein Ids: unique protein identifier (accession number). Protein group: proteins sharing the same identified peptides. Number of proteins: number of proteins in a protein group. Peptides: number of peptides assigned to one protein group. Razor peptide: a peptide assigned to the protein group with the largest number of total peptides identified. Razor + unique peptides: peptides assigned to the protein group with the largest number of total peptides, which only match to this specific protein group. Unique peptides: unique peptide sequences after removing redundancy from peptide hits.

|                                                             |                                                             |                                                                                                                                                                                                                                                                  |                    |          |                         |                 |                   | Intensity  |           |            |            |
|-------------------------------------------------------------|-------------------------------------------------------------|------------------------------------------------------------------------------------------------------------------------------------------------------------------------------------------------------------------------------------------------------------------|--------------------|----------|-------------------------|-----------------|-------------------|------------|-----------|------------|------------|
| Protein IDs                                                 | Majority protein IDs                                        | Fasta headers                                                                                                                                                                                                                                                    | Number of proteins | Peptides | Razor + unique peptides | Unique peptides | Mol. weight [kDa] | Entonom    | Venom ATL | Pharmalgen | Hymnox     |
| XP_015187185.1;spQ6Q25.2.1 PA11_POLDO;AAS67041.1            | XP_015187185.1;spQ6Q25.2.1 PA11_POLDO;AAS67041.1            | XP_015187185.1 PREDICTED: phospholipase A1 1 [Polistes dominula];spQ6Q25.2.1 PA11_POLDO RecName: Full=Phospholipase A1 1; AltName: Allergen=Pol d 1; Flags: Precursor;AAS67041.1 venom phospholipase A1 1 precursor [Polistes dominula]                          | 3                  | 31       | 2                       | 0               | 37,559            | 3866200000 | 179370000 | 4568000000 | 3174700000 |
| sp P0C1M7.1 MASTB_POLDO                                     | sp P0C1M7.1 MASTB_POLDO                                     | sp P0C1M7.1 MASTB_POLDO RecName: Full=Dominulin-B                                                                                                                                                                                                                | 1                  | 2        | 2                       | 2               | 1,9113            | 1616400000 | 0         | 0          | 0          |
| XP_015171391.1                                              | XP_015171391.1                                              | XP_015171391.1 PREDICTED: uncharacterized protein YJR142W [Polistes dominula]                                                                                                                                                                                    | 1                  | 2        | 2                       | 2               | 37,671            | 0          | 0         | 0          | 0          |
| XP_015171393.1                                              | XP_015171393.1                                              | XP_015171393.1 PREDICTED: aspartate aminotransferase, mitochondrial [Polistes dominula]                                                                                                                                                                          | 1                  | 2        | 2                       | 2               | 47,906            | 16371000   | 0         | 0          | 0          |
| XP_015171471.1                                              | XP_015171471.1                                              | XP_015171471.1 PREDICTED: probable salivary secreted peptide [Polistes dominula]                                                                                                                                                                                 | 1                  | 2        | 2                       | 2               | 14,523            | 0          | 0         | 0          | 7722500    |
| XP_015171577.1;XP_015171576.1;XP_015171575.1                | XP_015171577.1;XP_015171576.1;XP_015171575.1                | XP_015171577.1 PREDICTED: pyruvate carboxylase, mitochondrial isoform X3 [Polistes dominula];XP_015171576.1 PREDICTED: pyruvate carboxylase, mitochondrial isoform X2 [Polistes dominula];XP_015171575.1 PREDICTED: pyruvate carboxylase, mitochondrial isoform  | 3                  | 2        | 2                       | 2               | 112,04            | 0          | 0         | 106590000  | 0          |
| XP_015171752.1;XP_015171751.1                               | XP_015171752.1;XP_015171751.1                               | XP_015171752.1 PREDICTED: phosphoserine phosphatase isoform X2 [Polistes dominula];XP_015171751.1 PREDICTED: phosphoserine phosphatase isoform X1 [Polistes dominula]                                                                                            | 2                  | 2        | 2                       | 2               | 25,17             | 0          | 5435800   | 0          | 0          |
| XP_015171804.1;XP_015171803.1;XP_015171802.1;XP_015171801.1 | XP_015171804.1;XP_015171803.1;XP_015171802.1;XP_015171801.1 | XP_015171804.1 PREDICTED: renin receptor isoform X4 [Polistes dominula];XP_015171803.1 PREDICTED: renin receptor isoform X3 [Polistes dominula];XP_015171802.1 PREDICTED: renin receptor isoform X2 [Polistes dominula];XP_015171801.1 PREDICTED: renin receptor | 4                  | 2        | 2                       | 2               | 47,549            | 8041900    | 0         | 0          | 0          |
| XP_015171815.1                                              | XP_015171815.1                                              | XP_015171815.1 PREDICTED: peroxiredoxin-6-like [Polistes dominula]                                                                                                                                                                                               | 1                  | 2        | 2                       | 2               | 24,971            | 12336000   | 0         | 0          | 0          |
| XP_015172205.1                                              | XP_015172205.1                                              | XP_015172205.1 PREDICTED: chloride intracellular channel exc-4 [Polistes dominula]                                                                                                                                                                               | 1                  | 2        | 2                       | 2               | 29,846            | 0          | 0         | 0          | 0          |
| XP_015172559.1;XP_015172558.1                               | XP_015172559.1;XP_015172558.1                               | XP_015172559.1 PREDICTED: poly(U)-specific endoribonuclease homolog [Polistes dominula];XP_015172558.1 PREDICTED: poly(U)-specific endoribonuclease homolog [Polistes dominula]                                                                                  | 2                  | 2        | 2                       | 2               | 37,791            | 2040700    | 6230400   | 0          | 0          |
| XP_015172580.1                                              | XP_015172580.1                                              | XP_015172580.1 PREDICTED: plasminogen activator inhibitor 1 RNA-binding protein [Polistes dominula]                                                                                                                                                              | 1                  | 2        | 2                       | 2               | 47,78             | 0          | 0         | 0          | 0          |
| XP_015188342.1;XP_015172763.1                               | XP_015188342.1;XP_015172763.1                               | XP_015188342.1 PREDICTED: 40S ribosomal protein S28-like [Polistes dominula];XP_015172763.1 PREDICTED: 40S ribosomal protein S28 [Polistes dominula]                                                                                                             | 2                  | 2        | 2                       | 2               | 7,3996            | 11708000   | 4247600   | 20585000   | 0          |
| XP_015181269.1;XP_015177524.1;XP_015173448.1                | XP_015181269.1;XP_015177524.1;XP_015173448.1                | XP_015181269.1 PREDICTED: histone H2B [Polistes dominula];XP_015177524.1 PREDICTED: histone H2B-like [Polistes dominula];XP_015173448.1 PREDICTED: histone H2B-like [Polistes dominula]                                                                          | 3                  | 2        | 2                       | 2               | 13,728            | 20928000   | 0         | 0          | 0          |

|                                                                                                                                        |                                                                                                                                        |                                                                                                                                                                                                                                                                  |   |   |   |   |        |         |          |         |         |
|----------------------------------------------------------------------------------------------------------------------------------------|----------------------------------------------------------------------------------------------------------------------------------------|------------------------------------------------------------------------------------------------------------------------------------------------------------------------------------------------------------------------------------------------------------------|---|---|---|---|--------|---------|----------|---------|---------|
| XP_015173468.1;XP_015173467.1;XP_015173466.1;XP_015173465.1;XP_015173464.1;XP_015173463.1;XP_015173462.1;XP_015173461.1;XP_015173460.1 | XP_015173468.1;XP_015173467.1;XP_015173466.1;XP_015173465.1;XP_015173464.1;XP_015173463.1;XP_015173462.1;XP_015173461.1;XP_015173460.1 | XP_015173468.1 PREDICTED: uncharacterized protein LOC107064856 isoform X6 [Polistes dominula];XP_015173467.1 PREDICTED: uncharacterized protein LOC107064856 isoform X5 [Polistes dominula];XP_015173466.1 PREDICTED: uncharacterized protein LOC107064856 isofo | 8 | 2 | 2 | 2 | 100,95 | 0       | 0        | 0       | 1002900 |
| XP_015173510.1                                                                                                                         | XP_015173510.1                                                                                                                         | XP_015173510.1 PREDICTED: sorting nexin-12 [Polistes dominula]                                                                                                                                                                                                   | 1 | 2 | 2 | 2 | 19,045 | 0       | 0        | 0       | 0       |
| XP_015174063.1;XP_015174062.1;XP_015174061.1;XP_015174060.1                                                                            | XP_015174063.1;XP_015174062.1;XP_015174061.1;XP_015174060.1                                                                            | XP_015174063.1 PREDICTED: alpha-tocopherol transfer protein-like isoform X2 [Polistes dominula];XP_015174062.1 PREDICTED: alpha-tocopherol transfer protein-like isoform X2 [Polistes dominula];XP_015174061.1 PREDICTED: alpha-tocopherol transfer protein-like | 4 | 2 | 2 | 2 | 35,19  | 5004800 | 0        | 0       | 0       |
| XP_015174070.1;XP_015174069.1;XP_015174068.1;XP_015174067.1;XP_015174066.1;XP_015174065.1;XP_015174064.1                               | XP_015174070.1;XP_015174069.1;XP_015174068.1;XP_015174067.1;XP_015174066.1;XP_015174065.1;XP_015174064.1                               | XP_015174070.1 PREDICTED: vinculin isoform X7 [Polistes dominula];XP_015174069.1 PREDICTED: vinculin isoform X6 [Polistes dominula];XP_015174068.1 PREDICTED: vinculin isoform X5 [Polistes dominula];XP_015174072.1 PREDICTED: vinculin isoform X9 [Polistes do | 9 | 2 | 2 | 2 | 107,16 | 1088100 | 0        | 0       | 0       |
| XP_015174105.1                                                                                                                         | XP_015174105.1                                                                                                                         | XP_015174105.1 PREDICTED: glycine-rich cell wall structural protein-like [Polistes dominula]                                                                                                                                                                     | 1 | 2 | 2 | 2 | 39,436 | 0       | 84925000 | 0       | 0       |
| XP_015174139.1                                                                                                                         | XP_015174139.1                                                                                                                         | XP_015174139.1 PREDICTED: mesencephalic astrocyte-derived neurotrophic factor homolog [Polistes dominula]                                                                                                                                                        | 1 | 2 | 2 | 2 | 20,189 | 0       | 21328000 | 7259700 | 2953000 |
| XP_015174186.1                                                                                                                         | XP_015174186.1                                                                                                                         | XP_015174186.1 PREDICTED: aldose 1-epimerase [Polistes dominula]                                                                                                                                                                                                 | 1 | 2 | 2 | 2 | 41,641 | 0       | 58296000 | 0       | 0       |
| XP_015174359.1;XP_015174358.1;XP_015174357.1                                                                                           | XP_015174359.1;XP_015174358.1;XP_015174357.1                                                                                           | XP_015174359.1 PREDICTED: fasciclin-2 isoform X4 [Polistes dominula];XP_015174358.1 PREDICTED: fasciclin-2 isoform X3 [Polistes dominula];XP_015174356.1 PREDICTED: fasciclin-2 isoform X1 [Polistes dominula];XP_015174357.1 PREDICTED: fasciclin-2 isoform X2  | 4 | 2 | 2 | 2 | 88,348 | 4441700 | 0        | 0       | 0       |
| XP_015174371.1;XP_015174370.1                                                                                                          | XP_015174371.1;XP_015174370.1                                                                                                          | XP_015174371.1 PREDICTED: leukocyte elastase inhibitor-like isoform X2 [Polistes dominula];XP_015174370.1 PREDICTED: leukocyte elastase inhibitor-like isoform X1 [Polistes dominula]                                                                            | 2 | 2 | 2 | 2 | 49,615 | 0       | 34111000 | 0       | 0       |
| XP_015174516.1;XP_015174515.1                                                                                                          | XP_015174516.1;XP_015174515.1                                                                                                          | XP_015174516.1 PREDICTED: peptidyl-prolyl cis-trans isomerase FKBP4-like isoform X2 [Polistes dominula];XP_015174515.1 PREDICTED: FK506-binding protein 59-like isoform X1 [Polistes dominula]                                                                   | 2 | 2 | 2 | 2 | 45,63  | 0       | 25483000 | 0       | 0       |

|                                              |                                              |                                                                                                                                                                                                                                              |   |   |   |   |        |          |          |          |         |
|----------------------------------------------|----------------------------------------------|----------------------------------------------------------------------------------------------------------------------------------------------------------------------------------------------------------------------------------------------|---|---|---|---|--------|----------|----------|----------|---------|
| XP_015174856.1                               | XP_015174856.1                               | XP_015174856.1 PREDICTED: serine/threonine-protein phosphatase 2A activator-like [Polistes dominula]                                                                                                                                         | 1 | 2 | 2 | 2 | 38,447 | 0        | 8750300  | 0        | 0       |
| XP_015175066.1                               | XP_015175066.1                               | XP_015175066.1 PREDICTED: magnesium-dependent phosphatase 1-like [Polistes dominula]                                                                                                                                                         | 1 | 2 | 2 | 2 | 18,845 | 0        | 10166000 | 0        | 0       |
| XP_015175125.1                               | XP_015175125.1                               | XP_015175125.1 PREDICTED: estradiol 17-beta-dehydrogenase 8-like [Polistes dominula]                                                                                                                                                         | 1 | 2 | 2 | 2 | 26,658 | 0        | 9737600  | 0        | 0       |
| XP_015175375.1;XP_015175374.1                | XP_015175375.1;XP_015175374.1                | XP_015175375.1 PREDICTED: 40S ribosomal protein S12 isoform X2 [Polistes dominula];XP_015175374.1 PREDICTED: 40S ribosomal protein S12 isoform X1 [Polistes dominula]                                                                        | 2 | 2 | 2 | 2 | 13,541 | 0        | 19166000 | 0        | 0       |
| XP_015175542.1                               | XP_015175542.1                               | XP_015175542.1 PREDICTED: transitional endoplasmic reticulum ATPase TER94 [Polistes dominula]                                                                                                                                                | 1 | 2 | 2 | 2 | 88,693 | 2806900  | 0        | 0        | 0       |
| XP_015175593.1                               | XP_015175593.1                               | XP_015175593.1 PREDICTED: uncharacterized protein LOC107065962 [Polistes dominula]                                                                                                                                                           | 1 | 2 | 2 | 2 | 33,21  | 0        | 0        | 0        | 0       |
| XP_015175623.1;XP_015187333.1;XP_015187332.1 | XP_015175623.1;XP_015187333.1;XP_015187332.1 | XP_015175623.1 PREDICTED: acetylcholinesterase [Polistes dominula];XP_015187333.1 PREDICTED: venom carboxylesterase-6-like isoform X2 [Polistes dominula];XP_015187332.1 PREDICTED: esterase FE4-like isoform X1 [Polistes dominula]         | 3 | 2 | 2 | 2 | 62,512 | 0        | 7388200  | 0        | 0       |
| XP_015175776.1;XP_015175775.1                | XP_015175776.1;XP_015175775.1                | XP_015175776.1 PREDICTED: regulator of chromosome condensation-like isoform X2 [Polistes dominula];XP_015175775.1 PREDICTED: regulator of chromosome condensation-like isoform X1 [Polistes dominula]                                        | 2 | 2 | 2 | 2 | 46,03  | 0        | 0        | 0        | 0       |
| XP_015175900.1;XP_015175901.1;XP_015175899.1 | XP_015175900.1;XP_015175901.1;XP_015175899.1 | XP_015175900.1 PREDICTED: protein enhancer of sevenless 2B [Polistes dominula];XP_015175901.1 PREDICTED: protein enhancer of sevenless 2B [Polistes dominula];XP_015175899.1 PREDICTED: protein enhancer of sevenless 2B [Polistes dominula] | 3 | 2 | 2 | 2 | 24,746 | 0        | 7903600  | 7532900  | 2394600 |
| XP_015176317.1                               | XP_015176317.1                               | XP_015176317.1 PREDICTED: peptidyl-prolyl cis-trans isomerase FKBP1A [Polistes dominula]                                                                                                                                                     | 1 | 2 | 2 | 2 | 11,86  | 7136400  | 0        | 67439000 | 3240300 |
| XP_015176386.1                               | XP_015176386.1                               | XP_015176386.1 PREDICTED: abnormal spindle-like microcephaly-associated protein homolog [Polistes dominula]                                                                                                                                  | 1 | 2 | 2 | 2 | 15,539 | 0        | 0        | 0        | 0       |
| XP_015176486.1                               | XP_015176486.1                               | XP_015176486.1 PREDICTED: ubiquitin-like protein 5 [Polistes dominula]                                                                                                                                                                       | 1 | 2 | 2 | 2 | 8,681  | 0        | 0        | 0        | 0       |
| XP_015176527.1                               | XP_015176527.1                               | XP_015176527.1 PREDICTED: lysozyme c-l-like [Polistes dominula]                                                                                                                                                                              | 1 | 2 | 2 | 2 | 18,23  | 33063000 | 0        | 0        | 0       |
| XP_015176929.1                               | XP_015176929.1                               | XP_015176929.1 PREDICTED: proline dehydrogenase 1, mitochondrial [Polistes dominula]                                                                                                                                                         | 1 | 2 | 2 | 2 | 71,853 | 6400500  | 0        | 0        | 0       |
| XP_015176930.1                               | XP_015176930.1                               | XP_015176930.1 PREDICTED: profilin [Polistes dominula]                                                                                                                                                                                       | 1 | 2 | 2 | 2 | 13,715 | 8910100  | 0        | 0        | 0       |
| XP_015177131.1;XP_015189964.1;XP_015189970.1 | XP_015177131.1;XP_015189964.1;XP_015189970.1 | XP_015177131.1 PREDICTED: titin [Polistes dominula];XP_015189964.1 PREDICTED: RNA-binding protein 12B-like, partial [Polistes dominula];XP_015189970.1 PREDICTED: RNA-binding protein 12B-like, partial [Polistes dominula]                  | 3 | 2 | 2 | 2 | 438,01 | 0        | 0        | 0        | 0       |

|                                                                                                                       |                                                                                                           |                                                                                                                                                                                                                                                                  |   |   |   |   |        |          |          |          |          |
|-----------------------------------------------------------------------------------------------------------------------|-----------------------------------------------------------------------------------------------------------|------------------------------------------------------------------------------------------------------------------------------------------------------------------------------------------------------------------------------------------------------------------|---|---|---|---|--------|----------|----------|----------|----------|
| XP_01517728<br>4.1;XP_01517<br>7283.1;XP_01<br>5177282.1;XP<br>_015177281.1<br>;XP_0151772<br>80.1;XP_0151<br>77279.1 | XP_015177284.1;XP_<br>015177283.1;XP_015<br>177282.1;XP_015177<br>281.1;XP_015177280.<br>1;XP_015177279.1 | XP_015177284.1 PREDICTED: coronin-6 isoform X3 [Polistes dominula];XP_015177283.1 PREDICTED: coronin-6 isoform X3 [Polistes dominula];XP_015177282.1 PREDICTED: coronin-6 isoform X3 [Polistes dominula];XP_015177281.1 PREDICTED: coronin-6 isoform X2 [Poliste | 6 | 2 | 2 | 2 | 54,775 | 0        | 3853600  | 0        | 842190   |
| XP_01517731<br>1.1                                                                                                    | XP_015177311.1                                                                                            | XP_015177311.1 PREDICTED: ubiquitin carboxyl-terminal hydrolase 14 [Polistes dominula]                                                                                                                                                                           | 1 | 2 | 2 | 2 | 56,986 | 0        | 0        | 0        | 0        |
| XP_01517780<br>6.1                                                                                                    | XP_015177806.1                                                                                            | XP_015177806.1 PREDICTED: ubiquitin-conjugating enzyme E2-17 kDa [Polistes dominula]                                                                                                                                                                             | 1 | 2 | 2 | 2 | 16,678 | 0        | 35033000 | 0        | 0        |
| XP_01517785<br>6.1                                                                                                    | XP_015177856.1                                                                                            | XP_015177856.1 PREDICTED: uroporphyrinogen decarboxylase [Polistes dominula]                                                                                                                                                                                     | 1 | 2 | 2 | 2 | 39,809 | 0        | 10567000 | 0        | 0        |
| XP_01517804<br>7.1;XP_01517<br>8045.1                                                                                 | XP_015178047.1;XP_<br>015178045.1                                                                         | XP_015178047.1 PREDICTED: SUMO-conjugating enzyme UBC9-B [Polistes dominula];XP_015178045.1 PREDICTED: SUMO-conjugating enzyme UBC9-B [Polistes dominula]                                                                                                        | 2 | 2 | 2 | 2 | 18,135 | 0        | 24148000 | 0        | 0        |
| XP_01517812<br>9.1;XP_01517<br>8128.1;XP_01<br>5178127.1                                                              | XP_015178129.1;XP_<br>015178128.1;XP_015<br>178127.1                                                      | XP_015178129.1 PREDICTED: beta-mannosidase isoform X3 [Polistes dominula];XP_015178128.1 PREDICTED: beta-mannosidase isoform X2 [Polistes dominula];XP_015178127.1 PREDICTED: beta-mannosidase isoform X1 [Polistes dominula]                                    | 3 | 2 | 2 | 2 | 89,441 | 0        | 8460400  | 0        | 0        |
| XP_01517818<br>4.1                                                                                                    | XP_015178184.1                                                                                            | XP_015178184.1 PREDICTED: adipocyte plasma membrane-associated protein-like [Polistes dominula]                                                                                                                                                                  | 1 | 2 | 2 | 2 | 75,446 | 0        | 6701700  | 0        | 0        |
| XP_01517822<br>1.1;XP_01517<br>8220.1;XP_01<br>5178219.1                                                              | XP_015178221.1;XP_<br>015178220.1;XP_015<br>178219.1                                                      | XP_015178221.1 PREDICTED: aspartate--tRNA ligase, cytoplasmic [Polistes dominula];XP_015178220.1 PREDICTED: aspartate--tRNA ligase, cytoplasmic [Polistes dominula];XP_015178219.1 PREDICTED: aspartate--tRNA ligase, cytoplasmic [Polistes dominula]            | 3 | 2 | 2 | 2 | 60,022 | 0        | 10686000 | 0        | 0        |
| XP_01517837<br>6.1                                                                                                    | XP_015178376.1                                                                                            | XP_015178376.1 PREDICTED: PC4 and SFRS1-interacting protein [Polistes dominula]                                                                                                                                                                                  | 1 | 2 | 2 | 2 | 63,542 | 0        | 0        | 0        | 32234000 |
| XP_01517865<br>3.1                                                                                                    | XP_015178653.1                                                                                            | XP_015178653.1 PREDICTED: ubiquitin domain-containing protein UBFD1-like [Polistes dominula]                                                                                                                                                                     | 1 | 2 | 2 | 2 | 34,426 | 0        | 7018000  | 0        | 0        |
| XP_01517874<br>3.1                                                                                                    | XP_015178743.1                                                                                            | XP_015178743.1 PREDICTED: uncharacterized protein LOC107067604 [Polistes dominula]                                                                                                                                                                               | 1 | 2 | 2 | 2 | 342,16 | 0        | 0        | 0        | 0        |
| XP_01517877<br>9.1                                                                                                    | XP_015178779.1                                                                                            | XP_015178779.1 PREDICTED: deoxyribose-phosphate aldolase [Polistes dominula]                                                                                                                                                                                     | 1 | 2 | 2 | 2 | 34,508 | 0        | 5537900  | 17133000 | 0        |
| XP_01517880<br>0.1                                                                                                    | XP_015178800.1                                                                                            | XP_015178800.1 PREDICTED: LDLR chaperone boca [Polistes dominula]                                                                                                                                                                                                | 1 | 2 | 2 | 2 | 23,378 | 0        | 18221000 | 0        | 0        |
| XP_01517883<br>3.1;XP_01517<br>8832.1;XP_01<br>5178831.1;XP<br>_015178830.1<br>;XP_0151788<br>29.1;XP_0151<br>78828.1 | XP_015178833.1;XP_<br>015178832.1;XP_015<br>178831.1;XP_015178<br>830.1;XP_015178829.<br>1;XP_015178828.1 | XP_015178833.1 PREDICTED: 2-oxoglutarate dehydrogenase, mitochondrial isoform X6 [Polistes dominula];XP_015178832.1 PREDICTED: 2-oxoglutarate dehydrogenase, mitochondrial isoform X5 [Polistes dominula];XP_015178831.1 PREDICTED: 2-oxoglutarate dehydrogenase | 6 | 2 | 2 | 2 | 115,32 | 2708900  | 0        | 0        | 0        |
| XP_01517896<br>7.1                                                                                                    | XP_015178967.1                                                                                            | XP_015178967.1 PREDICTED: ATP synthase subunit O, mitochondrial [Polistes dominula]                                                                                                                                                                              | 1 | 2 | 2 | 2 | 22,576 | 15805000 | 0        | 0        | 0        |

|                                                                                                                                                        |                                                                                                                                                       |                                                                                                                                                                                                                                                                  |   |   |   |   |        |          |           |           |          |
|--------------------------------------------------------------------------------------------------------------------------------------------------------|-------------------------------------------------------------------------------------------------------------------------------------------------------|------------------------------------------------------------------------------------------------------------------------------------------------------------------------------------------------------------------------------------------------------------------|---|---|---|---|--------|----------|-----------|-----------|----------|
| XP_01517903.9.1                                                                                                                                        | XP_015179039.1                                                                                                                                        | XP_015179039.1 PREDICTED: coiled-coil domain-containing protein 58 [Polistes dominula]                                                                                                                                                                           | 1 | 2 | 2 | 2 | 16,738 | 0        | 4936300   | 0         | 0        |
| XP_01517907.0.1                                                                                                                                        | XP_015179070.1                                                                                                                                        | XP_015179070.1 PREDICTED: la protein homolog [Polistes dominula]                                                                                                                                                                                                 | 1 | 2 | 2 | 2 | 51,819 | 0        | 0         | 795920000 | 0        |
| XP_01517921.7.1;XP_015179216.1;XP_015179215.1;XP_015179214.1;XP_015179213.1;XP_015179212.1;XP_015179211.1;XP_015179210.1;XP_015179209.1;XP_015179208.1 | XP_015179217.1;XP_015179216.1;XP_015179215.1;XP_015179214.1;XP_015179213.1;XP_015179212.1;XP_015179211.1;XP_015179210.1;XP_015179209.1;XP_015179208.1 | XP_015179217.1 PREDICTED: RNA-binding protein 4.1-like isoform X5 [Polistes dominula];XP_015179216.1 PREDICTED: RNA-binding protein 4.1-like isoform X4 [Polistes dominula];XP_015179215.1 PREDICTED: RNA-binding protein 4-like isoform X3 [Polistes dominula]; | 7 | 2 | 2 | 2 | 35,483 | 0        | 0         | 0         | 0        |
| XP_01517926.0.1                                                                                                                                        | XP_015179260.1                                                                                                                                        | XP_015179260.1 PREDICTED: protein NPC2 homolog [Polistes dominula]                                                                                                                                                                                               | 1 | 2 | 2 | 2 | 16,763 | 0        | 23675000  | 0         | 23750000 |
| XP_01517976.8.1                                                                                                                                        | XP_015179768.1                                                                                                                                        | XP_015179768.1 PREDICTED: translation machinery-associated protein 7 homolog [Polistes dominula]                                                                                                                                                                 | 1 | 2 | 2 | 2 | 6,937  | 0        | 131250000 | 0         | 0        |
| XP_01517978.6.1                                                                                                                                        | XP_015179786.1                                                                                                                                        | XP_015179786.1 PREDICTED: protein CDV3 homolog [Polistes dominula]                                                                                                                                                                                               | 1 | 2 | 2 | 2 | 27,699 | 0        | 0         | 0         | 0        |
| XP_01518023.3.1                                                                                                                                        | XP_015180233.1                                                                                                                                        | XP_015180233.1 PREDICTED: very long-chain specific acyl-CoA dehydrogenase, mitochondrial [Polistes dominula]                                                                                                                                                     | 1 | 2 | 2 | 2 | 69,648 | 17916000 | 0         | 0         | 0        |
| XP_01518024.7.1                                                                                                                                        | XP_015180247.1                                                                                                                                        | XP_015180247.1 PREDICTED: venom acid phosphatase Acph-1-like [Polistes dominula]                                                                                                                                                                                 | 1 | 2 | 2 | 2 | 47,808 | 0        | 11156000  | 0         | 0        |
| XP_01518035.9.1                                                                                                                                        | XP_015180359.1                                                                                                                                        | XP_015180359.1 PREDICTED: probable aspartate aminotransferase, cytoplasmic [Polistes dominula]                                                                                                                                                                   | 1 | 2 | 2 | 2 | 46,631 | 6473300  | 0         | 0         | 2048800  |
| XP_01518055.9.1                                                                                                                                        | XP_015180559.1                                                                                                                                        | XP_015180559.1 PREDICTED: uncharacterized protein LOC107068554 [Polistes dominula]                                                                                                                                                                               | 1 | 2 | 2 | 2 | 181,35 | 0        | 23832000  | 0         | 26839000 |
| XP_01518087.9.1                                                                                                                                        | XP_015180879.1                                                                                                                                        | XP_015180879.1 PREDICTED: mitochondrial fission 1 protein-like isoform X2 [Polistes dominula]                                                                                                                                                                    | 1 | 2 | 2 | 2 | 16,924 | 4624000  | 7045600   | 5393200   | 0        |
| XP_01518111.9.1;XP_015181118.1                                                                                                                         | XP_015181119.1;XP_015181118.1                                                                                                                         | XP_015181119.1 PREDICTED: syntaxin-7-like [Polistes dominula];XP_015181118.1 PREDICTED: syntaxin-7-like [Polistes dominula]                                                                                                                                      | 2 | 2 | 2 | 2 | 46,093 | 0        | 2614900   | 0         | 0        |
| XP_01518138.3.1                                                                                                                                        | XP_015181383.1                                                                                                                                        | XP_015181383.1 PREDICTED: calyculin-binding protein [Polistes dominula]                                                                                                                                                                                          | 1 | 2 | 2 | 2 | 25,939 | 0        | 0         | 0         | 0        |
| XP_01518148.0.1;XP_015181479.1;XP_015181478.1                                                                                                          | XP_015181480.1;XP_015181479.1;XP_015181478.1                                                                                                          | XP_015181480.1 PREDICTED: transcription factor BTF3 homolog 4 [Polistes dominula];XP_015181479.1 PREDICTED: transcription factor BTF3 homolog 4 [Polistes dominula];XP_015181478.1 PREDICTED: transcription factor BTF3 homolog 4 [Polistes dominula]            | 3 | 2 | 2 | 2 | 20,067 | 0        | 0         | 0         | 0        |
| XP_01518154.7.1                                                                                                                                        | XP_015181547.1                                                                                                                                        | XP_015181547.1 PREDICTED: kiellin/chordin-like protein [Polistes dominula]                                                                                                                                                                                       | 1 | 2 | 2 | 2 | 35,413 | 11615000 | 0         | 0         | 0        |
| XP_01518157.1.1;XP_015181570.1;XP_015181569.1;XP_015181568.1;XP_015181567.1                                                                            | XP_015181571.1;XP_015181570.1;XP_015181569.1;XP_015181568.1;XP_015181567.1                                                                            | XP_015181571.1 PREDICTED: putative uncharacterized protein DDB_G0290521 isoform X4 [Polistes dominula];XP_015181570.1 PREDICTED: putative uncharacterized protein DDB_G0290521 isoform X3 [Polistes dominula];XP_015181569.1 PREDICTED: extensin-like isoform X2 | 5 | 2 | 2 | 2 | 30,676 | 0        | 0         | 143180000 | 0        |

|                                                                                            |                                                                                           |                                                                                                                                                                                                                                                                                                                                                                                                                                                                                                                                     |   |   |   |   |        |          |             |            |           |
|--------------------------------------------------------------------------------------------|-------------------------------------------------------------------------------------------|-------------------------------------------------------------------------------------------------------------------------------------------------------------------------------------------------------------------------------------------------------------------------------------------------------------------------------------------------------------------------------------------------------------------------------------------------------------------------------------------------------------------------------------|---|---|---|---|--------|----------|-------------|------------|-----------|
| XP_01518173.6.1                                                                            | XP_015181736.1                                                                            | XP_015181736.1 PREDICTED: methionine aminopeptidase 1 [Polistes dominula]                                                                                                                                                                                                                                                                                                                                                                                                                                                           | 1 | 2 | 2 | 2 | 42,308 | 0        | 0           | 0          | 0         |
| XP_01518182.4.1                                                                            | XP_015181824.1                                                                            | XP_015181824.1 PREDICTED: dehydrogenase/reductase SDR family member 11-like [Polistes dominula]                                                                                                                                                                                                                                                                                                                                                                                                                                     | 1 | 2 | 2 | 2 | 26,94  | 0        | 8687300     | 0          | 0         |
| XP_01518198.7.1                                                                            | XP_015181987.1                                                                            | XP_015181987.1 PREDICTED: GMP reductase 1-like [Polistes dominula]                                                                                                                                                                                                                                                                                                                                                                                                                                                                  | 1 | 2 | 2 | 2 | 37,86  | 0        | 2866000     | 0          | 1185100   |
| XP_01518204.8.1                                                                            | XP_015182048.1                                                                            | XP_015182048.1 PREDICTED: histidine triad nucleotide-binding protein 1 [Polistes dominula]                                                                                                                                                                                                                                                                                                                                                                                                                                          | 1 | 2 | 2 | 2 | 17,31  | 0        | 15030000    | 0          | 3111900   |
| XP_01518236.3.1;XP_015182362.1                                                             | XP_015182363.1;XP_015182362.1                                                             | XP_015182363.1 PREDICTED: extended synaptotagmin-2 isoform X2 [Polistes dominula];XP_015182362.1 PREDICTED: extended synaptotagmin-2 isoform X1 [Polistes dominula]                                                                                                                                                                                                                                                                                                                                                                 | 2 | 2 | 2 | 2 | 90,538 | 0        | 0           | 0          | 0         |
| XP_01518242.5.1                                                                            | XP_015182425.1                                                                            | XP_015182425.1 PREDICTED: isopentenyl-diphosphate Delta-isomerase 1 [Polistes dominula]                                                                                                                                                                                                                                                                                                                                                                                                                                             | 1 | 2 | 2 | 2 | 28,583 | 0        | 3417300     | 0          | 0         |
| XP_01518254.8.1                                                                            | XP_015182548.1                                                                            | XP_015182548.1 PREDICTED: uncharacterized protein LOC107069612 [Polistes dominula]                                                                                                                                                                                                                                                                                                                                                                                                                                                  | 1 | 2 | 2 | 2 | 9,6082 | 0        | 37417000    | 0          | 0         |
| XP_01518289.4.1                                                                            | XP_015182894.1                                                                            | XP_015182894.1 PREDICTED: 40S ribosomal protein S10-like [Polistes dominula]                                                                                                                                                                                                                                                                                                                                                                                                                                                        | 1 | 2 | 2 | 2 | 18,008 | 3360400  | 0           | 0          | 0         |
| XP_01518317.3.1                                                                            | XP_015183173.1                                                                            | XP_015183173.1 PREDICTED: coiled-coil domain-containing protein 25 [Polistes dominula]                                                                                                                                                                                                                                                                                                                                                                                                                                              | 1 | 2 | 2 | 2 | 24,592 | 0        | 3650400     | 0          | 0         |
| XP_01518329.9.1                                                                            | XP_015183299.1                                                                            | XP_015183299.1 PREDICTED: Na <sup>+</sup> /H <sup>+</sup> exchange regulatory cofactor NHE-RF1 [Polistes dominula]                                                                                                                                                                                                                                                                                                                                                                                                                  | 1 | 2 | 2 | 2 | 30,333 | 23566000 | 0           | 0          | 2695300   |
| XP_01518343.2.1;XP_015183431.1;XP_015183430.1;XP_015183429.1;XP_015183428.1;XP_015183427.1 | XP_015183432.1;XP_015183431.1;XP_015183430.1;XP_015183429.1;XP_015183428.1;XP_015183427.1 | XP_015183432.1 PREDICTED: protein tyrosine phosphatase type IVA 1 [Polistes dominula];XP_015183431.1 PREDICTED: protein tyrosine phosphatase type IVA 1 [Polistes dominula];XP_015183430.1 PREDICTED: protein tyrosine phosphatase type IVA 1 [Polistes dominula];XP_015183429.1 PREDICTED: protein tyrosine phosphatase type IVA 1 [Polistes dominula];XP_015183428.1 PREDICTED: protein tyrosine phosphatase type IVA 1 [Polistes dominula];XP_015183427.1 PREDICTED: protein tyrosine phosphatase type IVA 1 [Polistes dominula] | 6 | 2 | 2 | 2 | 20,109 | 0        | 0           | 0          | 0         |
| XP_01518460.3.1;XP_015184602.1;XP_015184600.1;XP_015184599.1                               | XP_015184603.1;XP_015184602.1;XP_015184600.1;XP_015184599.1                               | XP_015184603.1 PREDICTED: aminopeptidase N isoform X2 [Polistes dominula];XP_015184602.1 PREDICTED: aminopeptidase N isoform X2 [Polistes dominula];XP_015184600.1 PREDICTED: aminopeptidase N isoform X2 [Polistes dominula];XP_015184599.1 PREDICTED: aminopep                                                                                                                                                                                                                                                                    | 4 | 2 | 2 | 2 | 113,23 | 3093800  | 2240000     | 0          | 0         |
| XP_01518471.7.1;XP_015184716.1                                                             | XP_015184717.1;XP_015184716.1                                                             | XP_015184717.1 PREDICTED: uncharacterized protein DDB_G0286299-like [Polistes dominula];XP_015184716.1 PREDICTED: uncharacterized protein DDB_G0286299-like [Polistes dominula]                                                                                                                                                                                                                                                                                                                                                     | 2 | 2 | 2 | 2 | 42,272 | 0        | 0           | 0          | 0         |
| XP_01518502.7.1;XP_015185026.1;XP_015185024.1;XP_015185023.1                               | XP_015185027.1;XP_015185026.1;XP_015185024.1;XP_015185023.1                               | XP_015185027.1 PREDICTED: peroxiredoxin-5, mitochondrial isoform X2 [Polistes dominula];XP_015185026.1 PREDICTED: peroxiredoxin-5, mitochondrial isoform X2 [Polistes dominula];XP_015185024.1 PREDICTED: peroxiredoxin-5, mitochondrial isoform X2 [Polistes do                                                                                                                                                                                                                                                                    | 4 | 2 | 2 | 2 | 16,732 | 36176000 | 0           | 0          | 0         |
| XP_01518510.8.1                                                                            | XP_015185108.1                                                                            | XP_015185108.1 PREDICTED: pyrimidodiazequine synthase-like [Polistes dominula]                                                                                                                                                                                                                                                                                                                                                                                                                                                      | 1 | 2 | 2 | 2 | 27,772 | 0        | 10368000    | 0          | 0         |
| XP_01518520.5.1                                                                            | XP_015185205.1                                                                            | XP_015185205.1 PREDICTED: protein FAM32A [Polistes dominula]                                                                                                                                                                                                                                                                                                                                                                                                                                                                        | 1 | 2 | 2 | 2 | 13,712 | 0        | 14181000000 | 2184200000 | 714470000 |

|                                                                                                                                                                                    |                                                                                                                                                                    |                                                                                                                                                                                                                                                                  |   |   |   |   |        |          |          |          |         |
|------------------------------------------------------------------------------------------------------------------------------------------------------------------------------------|--------------------------------------------------------------------------------------------------------------------------------------------------------------------|------------------------------------------------------------------------------------------------------------------------------------------------------------------------------------------------------------------------------------------------------------------|---|---|---|---|--------|----------|----------|----------|---------|
| XP_01518527<br>7.1;XP_01518<br>5276.1                                                                                                                                              | XP_015185277.1;XP_<br>015185276.1                                                                                                                                  | XP_015185277.1 PREDICTED: F-actin-capping protein subunit beta isoform X2 [Polistes dominula];XP_015185276.1 PREDICTED: F-actin-capping protein subunit beta isoform X1 [Polistes dominula]                                                                      | 2 | 2 | 2 | 2 | 30,203 | 0        | 0        | 22469000 | 0       |
| XP_01518538<br>5.1                                                                                                                                                                 | XP_015185385.1                                                                                                                                                     | XP_015185385.1 PREDICTED: ribosome-recycling factor, mitochondrial [Polistes dominula]                                                                                                                                                                           | 1 | 2 | 2 | 2 | 33,38  | 0        | 0        | 0        | 0       |
| XP_01518566<br>1.1;XP_01518<br>5660.1;XP_01<br>5185659.1;XP<br>_015185658.1<br>;XP_0151856<br>57.1;XP_0151<br>85656.1;XP_0<br>15185655.1;X<br>P_015185654.<br>1;XP_015185<br>653.1 | XP_015185661.1;XP_<br>015185660.1;XP_015<br>185659.1;XP_015185<br>658.1;XP_015185657.<br>1;XP_015185656.1;X<br>P_015185655.1;XP_0<br>15185654.1;XP_0151<br>85653.1 | XP_015185661.1 PREDICTED: ras-related protein Rab-5B [Polistes dominula];XP_015185660.1 PREDICTED: ras-related protein Rab-5B [Polistes dominula];XP_015185659.1 PREDICTED: ras-related protein Rab-5B [Polistes dominula];XP_015185658.1 PREDICTED: ras-related | 9 | 2 | 2 | 2 | 23,472 | 0        | 0        | 0        | 0       |
| XP_01518566<br>8.1;XP_01518<br>5666.1                                                                                                                                              | XP_015185668.1;XP_<br>015185666.1                                                                                                                                  | XP_015185668.1 PREDICTED: UTP--glucose-1-phosphate uridylyltransferase isoform X2 [Polistes dominula];XP_015185666.1 PREDICTED: UTP--glucose-1-phosphate uridylyltransferase isoform X1 [Polistes dominula]                                                      | 2 | 2 | 2 | 2 | 57,566 | 8563900  | 0        | 0        | 0       |
| XP_01518567<br>8.1                                                                                                                                                                 | XP_015185678.1                                                                                                                                                     | XP_015185678.1 PREDICTED: DNA ligase 1-like [Polistes dominula]                                                                                                                                                                                                  | 1 | 2 | 2 | 2 | 38,872 | 0        | 0        | 0        | 0       |
| XP_01518569<br>9.1;XP_01518<br>5698.1                                                                                                                                              | XP_015185699.1;XP_<br>015185698.1                                                                                                                                  | XP_015185699.1 PREDICTED: uncharacterized protein LOC107071317 isoform X2 [Polistes dominula];XP_015185698.1 PREDICTED: uncharacterized protein LOC107071317 isoform X1 [Polistes dominula]                                                                      | 2 | 2 | 2 | 2 | 12,343 | 0        | 4360200  | 0        | 0       |
| XP_01518574<br>1.1                                                                                                                                                                 | XP_015185741.1                                                                                                                                                     | XP_015185741.1 PREDICTED: eukaryotic initiation factor 4A-I [Polistes dominula]                                                                                                                                                                                  | 1 | 2 | 2 | 2 | 48,227 | 7210700  | 0        | 0        | 0       |
| XP_01518619<br>5.1;XP_01518<br>6194.1                                                                                                                                              | XP_015186195.1;XP_<br>015186194.1                                                                                                                                  | XP_015186195.1 PREDICTED: regucalcin-like isoform X2 [Polistes dominula];XP_015186194.1 PREDICTED: regucalcin-like isoform X1 [Polistes dominula]                                                                                                                | 2 | 2 | 2 | 2 | 34,971 | 0        | 21340000 | 14752000 | 4361000 |
| XP_01518627<br>4.1;XP_01518<br>6273.1                                                                                                                                              | XP_015186274.1;XP_<br>015186273.1                                                                                                                                  | XP_015186274.1 PREDICTED: vigilin [Polistes dominula];XP_015186273.1 PREDICTED: vigilin [Polistes dominula]                                                                                                                                                      | 2 | 2 | 2 | 2 | 139,5  | 0        | 0        | 0        | 0       |
| XP_01518664<br>8.1;XP_01518<br>6647.1                                                                                                                                              | XP_015186648.1;XP_<br>015186647.1                                                                                                                                  | XP_015186648.1 PREDICTED: uncharacterized protein LOC107071834 isoform X2 [Polistes dominula];XP_015186647.1 PREDICTED: uncharacterized protein LOC107071834 isoform X1 [Polistes dominula]                                                                      | 2 | 2 | 2 | 2 | 49,189 | 12998000 | 0        | 0        | 0       |

|                                                                                                                                                      |                                                                                                                                                       |                                                                                                                                                                                                                                                                                                                                                                                                                                                                                                                                                                                                                                                                                                                                                                                                                                                                           |    |   |   |   |        |          |          |          |          |
|------------------------------------------------------------------------------------------------------------------------------------------------------|-------------------------------------------------------------------------------------------------------------------------------------------------------|---------------------------------------------------------------------------------------------------------------------------------------------------------------------------------------------------------------------------------------------------------------------------------------------------------------------------------------------------------------------------------------------------------------------------------------------------------------------------------------------------------------------------------------------------------------------------------------------------------------------------------------------------------------------------------------------------------------------------------------------------------------------------------------------------------------------------------------------------------------------------|----|---|---|---|--------|----------|----------|----------|----------|
| XP_01518674.1;XP_015186749.1;XP_015186745.1;XP_015186744.1;XP_015186743.1;XP_015186742.1;XP_015186741.1;XP_015186740.1;XP_015186739.1;XP_015186738.1 | XP_015186747.1;XP_015186749.1;XP_015186745.1;XP_015186744.1;XP_015186743.1;XP_015186742.1;XP_015186741.1;XP_015186740.1;XP_015186739.1;XP_015186738.1 | XP_015186747.1 PREDICTED: myosin heavy chain, muscle isoform X9 [Polistes dominula];XP_015186749.1 PREDICTED: myosin heavy chain, muscle isoform X11 [Polistes dominula];XP_015186745.1 PREDICTED: myosin heavy chain, muscle isoform X8 [Polistes dominula];XP_015186744.1 PREDICTED: myosin heavy chain, muscle isoform X10 [Polistes dominula];XP_015186743.1 PREDICTED: myosin heavy chain, muscle isoform X9 [Polistes dominula];XP_015186742.1 PREDICTED: myosin heavy chain, muscle isoform X8 [Polistes dominula];XP_015186741.1 PREDICTED: myosin heavy chain, muscle isoform X8 [Polistes dominula];XP_015186740.1 PREDICTED: myosin heavy chain, muscle isoform X8 [Polistes dominula];XP_015186739.1 PREDICTED: myosin heavy chain, muscle isoform X8 [Polistes dominula];XP_015186738.1 PREDICTED: myosin heavy chain, muscle isoform X8 [Polistes dominula] | 11 | 2 | 2 | 2 | 223,25 | 0        | 29084000 | 0        | 0        |
| XP_01518720.1                                                                                                                                        | XP_015187200.1                                                                                                                                        | XP_015187200.1 PREDICTED: transcriptional adapter 2B isoform X13 [Polistes dominula]                                                                                                                                                                                                                                                                                                                                                                                                                                                                                                                                                                                                                                                                                                                                                                                      | 1  | 2 | 2 | 2 | 69,471 | 2026400  | 64608000 | 52067000 | 14478000 |
| XP_01518747.5.1                                                                                                                                      | XP_015187475.1                                                                                                                                        | XP_015187475.1 PREDICTED: partner of Y14 and mago [Polistes dominula]                                                                                                                                                                                                                                                                                                                                                                                                                                                                                                                                                                                                                                                                                                                                                                                                     | 1  | 2 | 2 | 2 | 23,633 | 0        | 0        | 0        | 0        |
| XP_01518811.0.1;XP_015188108.1;XP_015188107.1;XP_015188109.1                                                                                         | XP_015188110.1;XP_015188108.1;XP_015188107.1;XP_015188109.1                                                                                           | XP_015188110.1 PREDICTED: dystroglycan-like isoform X3 [Polistes dominula];XP_015188108.1 PREDICTED: dystroglycan-like isoform X1 [Polistes dominula];XP_015188107.1 PREDICTED: dystroglycan-like isoform X1 [Polistes dominula];XP_015188109.1 PREDICTED: dystroglycan-like isoform X1 [Polistes dominula];XP_015188109.1 PREDICTED: dystroglycan-like isoform X1 [Polistes dominula]                                                                                                                                                                                                                                                                                                                                                                                                                                                                                    | 4  | 2 | 2 | 2 | 130,1  | 4315800  | 0        | 0        | 0        |
| XP_01518817.0.1                                                                                                                                      | XP_015188170.1                                                                                                                                        | XP_015188170.1 PREDICTED: T-complex protein 1 subunit delta [Polistes dominula]                                                                                                                                                                                                                                                                                                                                                                                                                                                                                                                                                                                                                                                                                                                                                                                           | 1  | 2 | 2 | 2 | 57,302 | 3201800  | 0        | 0        | 0        |
| XP_01518827.3.1                                                                                                                                      | XP_015188273.1                                                                                                                                        | XP_015188273.1 PREDICTED: actin-interacting protein 1 [Polistes dominula]                                                                                                                                                                                                                                                                                                                                                                                                                                                                                                                                                                                                                                                                                                                                                                                                 | 1  | 2 | 2 | 2 | 66,201 | 0        | 0        | 0        | 7357300  |
| XP_01518846.5.1;XP_015188456.1                                                                                                                       | XP_015188465.1;XP_015188456.1                                                                                                                         | XP_015188465.1 PREDICTED: lamin Dm0-like isoform X2 [Polistes dominula];XP_015188456.1 PREDICTED: lamin Dm0-like isoform X1 [Polistes dominula]                                                                                                                                                                                                                                                                                                                                                                                                                                                                                                                                                                                                                                                                                                                           | 2  | 2 | 2 | 2 | 69,636 | 0        | 0        | 0        | 3203000  |
| XP_01518847.6.1                                                                                                                                      | XP_015188476.1                                                                                                                                        | XP_015188476.1 PREDICTED: protein SCO1 homolog, mitochondrial [Polistes dominula]                                                                                                                                                                                                                                                                                                                                                                                                                                                                                                                                                                                                                                                                                                                                                                                         | 1  | 2 | 2 | 2 | 29,851 | 0        | 4410900  | 0        | 0        |
| XP_01518893.8.1                                                                                                                                      | XP_015188938.1                                                                                                                                        | XP_015188938.1 PREDICTED: uncharacterized protein LOC107073047 [Polistes dominula]                                                                                                                                                                                                                                                                                                                                                                                                                                                                                                                                                                                                                                                                                                                                                                                        | 1  | 2 | 2 | 2 | 27,7   | 0        | 0        | 0        | 0        |
| XP_01518909.5.1;XP_015189094.1                                                                                                                       | XP_015189095.1;XP_015189094.1                                                                                                                         | XP_015189095.1 PREDICTED: WAP four-disulfide core domain protein 3-like [Polistes dominula];XP_015189094.1 PREDICTED: WAP four-disulfide core domain protein 3-like [Polistes dominula]                                                                                                                                                                                                                                                                                                                                                                                                                                                                                                                                                                                                                                                                                   | 2  | 2 | 2 | 2 | 15,443 | 30451000 | 0        | 0        | 0        |

|                                                                                                                                                                                                                                                                                                                                                                                                                 |                                                                                                                                                                                                                                                                                                                                                                             |                                                                                                                                                                                                                                                                  |    |   |   |   |        |          |           |           |           |
|-----------------------------------------------------------------------------------------------------------------------------------------------------------------------------------------------------------------------------------------------------------------------------------------------------------------------------------------------------------------------------------------------------------------|-----------------------------------------------------------------------------------------------------------------------------------------------------------------------------------------------------------------------------------------------------------------------------------------------------------------------------------------------------------------------------|------------------------------------------------------------------------------------------------------------------------------------------------------------------------------------------------------------------------------------------------------------------|----|---|---|---|--------|----------|-----------|-----------|-----------|
| XP_01518960<br>6.1;XP_01518<br>9605.1;XP_01<br>5189587.1;XP<br>_015189588.1<br>;XP_0151895<br>89.1;XP_0151<br>89590.1;XP_0<br>15189591.1;X<br>P_015189592.<br>1;XP_015189<br>593.1;XP_015<br>189594.1;XP_<br>015189595.1;<br>XP_01518959<br>6.1;XP_01518<br>9597.1;XP_01<br>5189598.1;XP<br>_015189600.1<br>;XP_0151896<br>02.1;XP_0151<br>89603.1;XP_0<br>15189604.1;X<br>P_015189586.<br>1;XP_015189<br>599.1 | XP_015189606.1;XP_<br>015189605.1;XP_015<br>189587.1;XP_015189<br>588.1;XP_015189589.<br>1;XP_015189590.1;X<br>P_015189591.1;XP_0<br>15189592.1;XP_0151<br>89593.1;XP_0151895<br>94.1;XP_015189595.1<br>;XP_015189596.1;XP<br>_015189597.1;XP_01<br>5189598.1;XP_01518<br>9600.1;XP_01518960<br>2.1;XP_015189603.1;<br>XP_015189604.1;XP_<br>015189586.1;XP_015<br>189599.1 | XP_015189606.1 PREDICTED: phosphatidylinositol-binding clathrin assembly protein LAP isoform X16 [Polistes dominula];XP_015189605.1 PREDICTED: phosphatidylinositol-binding clathrin assembly protein LAP isoform X15 [Polistes dominula];XP_015189587.1 PREDICT | 20 | 2 | 2 | 2 | 83,198 | 0        | 2761400   | 0         | 0         |
| XP_01518999<br>5.1                                                                                                                                                                                                                                                                                                                                                                                              | XP_015189995.1                                                                                                                                                                                                                                                                                                                                                              | XP_015189995.1 PREDICTED: ras-related protein Rab-2 [Polistes dominula]                                                                                                                                                                                          | 1  | 2 | 2 | 2 | 23,663 | 10984000 | 0         | 0         | 0         |
| XP_01519002<br>8.1;XP_01519<br>0027.1;XP_01<br>5190026.1;XP<br>_015190024.1<br>;XP_0151900<br>23.1                                                                                                                                                                                                                                                                                                              | XP_015190028.1;XP_<br>015190027.1;XP_015<br>190026.1;XP_015190<br>024.1;XP_015190023.<br>1                                                                                                                                                                                                                                                                                  | XP_015190028.1 PREDICTED: myosin-11 isoform X5 [Polistes dominula];XP_015190027.1 PREDICTED: myosin-11 isoform X4 [Polistes dominula];XP_015190026.1 PREDICTED: myosin-11 isoform X3 [Polistes dominula];XP_015190024.1 PREDICTED: myosin-11 isoform X2 [Poliste | 5  | 2 | 2 | 2 | 156,49 | 0        | 0         | 19380000  | 0         |
| XP_01519031<br>8.1                                                                                                                                                                                                                                                                                                                                                                                              | XP_015190318.1                                                                                                                                                                                                                                                                                                                                                              | XP_015190318.1 PREDICTED: phosphoglucomutase-2 [Polistes dominula]                                                                                                                                                                                               | 1  | 2 | 2 | 2 | 68,448 | 0        | 5985600   | 0         | 0         |
| XP_01519043<br>1.1                                                                                                                                                                                                                                                                                                                                                                                              | XP_015190431.1                                                                                                                                                                                                                                                                                                                                                              | XP_015190431.1 PREDICTED: protein amalgam-like [Polistes dominula]                                                                                                                                                                                               | 1  | 2 | 2 | 2 | 57,664 | 8815800  | 0         | 0         | 0         |
| XP_01519070<br>8.1                                                                                                                                                                                                                                                                                                                                                                                              | XP_015190708.1                                                                                                                                                                                                                                                                                                                                                              | XP_015190708.1 PREDICTED: myosin regulatory light chain 2 [Polistes dominula]                                                                                                                                                                                    | 1  | 2 | 2 | 2 | 23,277 | 0        | 968690000 | 232630000 | 363830000 |
| XP_01519098<br>4.1                                                                                                                                                                                                                                                                                                                                                                                              | XP_015190984.1                                                                                                                                                                                                                                                                                                                                                              | XP_015190984.1 PREDICTED: H/ACA ribonucleoprotein complex subunit 4 [Polistes dominula]                                                                                                                                                                          | 1  | 2 | 2 | 2 | 61,077 | 0        | 2228600   | 0         | 0         |
| XP_01519128<br>3.1                                                                                                                                                                                                                                                                                                                                                                                              | XP_015191283.1                                                                                                                                                                                                                                                                                                                                                              | XP_015191283.1 PREDICTED: selenide, water dikinase [Polistes dominula]                                                                                                                                                                                           | 1  | 2 | 2 | 2 | 45,101 | 4126000  | 13964000  | 0         | 0         |
| XP_01519132<br>7.1                                                                                                                                                                                                                                                                                                                                                                                              | XP_015191327.1                                                                                                                                                                                                                                                                                                                                                              | XP_015191327.1 PREDICTED: caspin-like [Polistes dominula]                                                                                                                                                                                                        | 1  | 2 | 2 | 2 | 38,061 | 0        | 7900600   | 0         | 0         |

|                                                                            |                                                                            |                                                                                                                                                                                                                                                                  |   |   |   |   |        |          |           |          |          |
|----------------------------------------------------------------------------|----------------------------------------------------------------------------|------------------------------------------------------------------------------------------------------------------------------------------------------------------------------------------------------------------------------------------------------------------|---|---|---|---|--------|----------|-----------|----------|----------|
| XP_015191348.1                                                             | XP_015191348.1                                                             | XP_015191348.1 PREDICTED: inositol monophosphatase 2-like [Polistes dominula]                                                                                                                                                                                    | 1 | 2 | 2 | 2 | 31,119 | 0        | 0         | 4804700  | 0        |
| XP_015191423.1;XP_015191422.1;XP_015191421.1;XP_015191420.1;XP_015191424.1 | XP_015191423.1;XP_015191422.1;XP_015191421.1;XP_015191420.1;XP_015191424.1 | XP_015191423.1 PREDICTED: alpha-actinin, sarcomeric isoform X2 [Polistes dominula];XP_015191422.1 PREDICTED: alpha-actinin, sarcomeric isoform X1 [Polistes dominula];XP_015191421.1 PREDICTED: alpha-actinin, sarcomeric isoform X1 [Polistes dominula];XP_0151 | 5 | 2 | 2 | 2 | 103,11 | 0        | 0         | 0        | 6195000  |
| XP_015191586.1                                                             | XP_015191586.1;XP_015191585.1                                              | XP_015191586.1 PREDICTED: activated RNA polymerase II transcriptional coactivator p15 isoform X2 [Polistes dominula];XP_015191585.1 PREDICTED: activated RNA polymerase II transcriptional coactivator p15 isoform X1 [Polistes dominula]                        | 2 | 2 | 2 | 2 | 13,775 | 0        | 0         | 0        | 0        |
| XP_015171239.1;XP_015171238.1;XP_015171237.1;XP_015171236.1;XP_015171235.1 | XP_015171239.1;XP_015171238.1;XP_015171237.1;XP_015171236.1;XP_015171235.1 | XP_015171239.1 PREDICTED: RNA-binding protein Nova-1 isoform X4 [Polistes dominula];XP_015171238.1 PREDICTED: RNA-binding protein Nova-1 isoform X3 [Polistes dominula];XP_015171237.1 PREDICTED: RNA-binding protein Nova-1 isoform X2 [Polistes dominula];XP_0 | 5 | 3 | 3 | 3 | 43,379 | 0        | 0         | 0        | 0        |
| XP_015172226.1;XP_015172225.1                                              | XP_015172226.1;XP_015172225.1                                              | XP_015172226.1 PREDICTED: succinate-semialdehyde dehydrogenase [NADP(+)] GabD [Polistes dominula];XP_015172225.1 PREDICTED: succinate-semialdehyde dehydrogenase [NADP(+)] GabD [Polistes dominula]                                                              | 2 | 3 | 3 | 3 | 54,63  | 0        | 0         | 0        | 0        |
| XP_015179060.1;XP_015184748.1;XP_015172916.1;XP_015172655.1;XP_015186969.1 | XP_015179060.1;XP_015184748.1;XP_015172916.1;XP_015172655.1;XP_015186969.1 | XP_015179060.1 PREDICTED: ubiquitin [Polistes dominula];XP_015184748.1 PREDICTED: ubiquitin-60S ribosomal protein L40 [Polistes dominula];XP_015172916.1 PREDICTED: ubiquitin-40S ribosomal protein S27a [Polistes dominula];XP_015172915.1 PREDICTED: ubiquitin | 6 | 3 | 3 | 3 | 12,845 | 0        | 134630000 | 17329000 | 52528000 |
| XP_015173290.1                                                             | XP_015173290.1                                                             | XP_015173290.1 PREDICTED: omega-amidase NIT2 [Polistes dominula]                                                                                                                                                                                                 | 1 | 3 | 3 | 3 | 34,148 | 0        | 58685000  | 0        | 0        |
| XP_015173359.1                                                             | XP_015173359.1                                                             | XP_015173359.1 PREDICTED: 4-coumarate--CoA ligase 1-like [Polistes dominula]                                                                                                                                                                                     | 1 | 3 | 3 | 3 | 53,898 | 4215500  | 13845000  | 0        | 0        |
| XP_015173532.1                                                             | XP_015173532.1                                                             | XP_015173532.1 PREDICTED: V-type proton ATPase subunit G [Polistes dominula]                                                                                                                                                                                     | 1 | 3 | 3 | 3 | 13,716 | 18065000 | 36783000  | 11315000 | 0        |
| XP_015173963.1                                                             | XP_015173963.1                                                             | XP_015173963.1 PREDICTED: trifunctional enzyme subunit alpha, mitochondrial [Polistes dominula]                                                                                                                                                                  | 1 | 3 | 3 | 3 | 82,364 | 0        | 0         | 0        | 0        |
| XP_015174089.1                                                             | XP_015174089.1                                                             | XP_015174089.1 PREDICTED: ubiquitin-conjugating enzyme E2 variant 2 [Polistes dominula]                                                                                                                                                                          | 1 | 3 | 3 | 3 | 16,334 | 0        | 0         | 0        | 0        |
| XP_015174199.1;XP_015174196.1                                              | XP_015174199.1;XP_015174196.1                                              | XP_015174199.1 PREDICTED: heterogeneous nuclear ribonucleoprotein R isoform X5 [Polistes dominula];XP_015174196.1 PREDICTED: heterogeneous nuclear ribonucleoprotein R isoform X2 [Polistes dominula]                                                            | 2 | 3 | 3 | 2 | 74,425 | 0        | 14973000  | 0        | 1875700  |
| XP_015174225.1                                                             | XP_015174225.1                                                             | XP_015174225.1 PREDICTED: probable medium-chain specific acyl-CoA dehydrogenase, mitochondrial [Polistes dominula]                                                                                                                                               | 1 | 3 | 3 | 3 | 46,395 | 36979000 | 1934500   | 0        | 0        |

|                                                                                                    |                                                                                            |                                                                                                                                                                                                                                                                            |   |   |   |   |        |          |          |          |         |
|----------------------------------------------------------------------------------------------------|--------------------------------------------------------------------------------------------|----------------------------------------------------------------------------------------------------------------------------------------------------------------------------------------------------------------------------------------------------------------------------|---|---|---|---|--------|----------|----------|----------|---------|
| XP_01517457<br>9.1;XP_01517<br>4578.1                                                              | XP_015174579.1;XP_<br>015174578.1                                                          | XP_015174579.1 PREDICTED: putative serine protease K12H4.7 [Polistes dominula];XP_015174578.1 PREDICTED: putative serine protease K12H4.7 [Polistes dominula]                                                                                                              | 2 | 3 | 3 | 3 | 56,184 | 0        | 9016900  | 0        | 0       |
| XP_01517463<br>6.1                                                                                 | XP_015174636.1                                                                             | XP_015174636.1 PREDICTED: lachesin [Polistes dominula]                                                                                                                                                                                                                     | 1 | 3 | 3 | 3 | 40,528 | 11325000 | 10343000 | 0        | 0       |
| XP_01517466<br>3.1;XP_01517<br>4662.1                                                              | XP_015174663.1;XP_<br>015174662.1                                                          | XP_015174663.1 PREDICTED: insulin-degrading enzyme isoform X2 [Polistes dominula];XP_015174662.1 PREDICTED: insulin-degrading enzyme isoform X1 [Polistes dominula]                                                                                                        | 2 | 3 | 3 | 3 | 118,35 | 0        | 15507000 | 0        | 0       |
| XP_01517467<br>7.1;XP_01517<br>4678.1;XP_01<br>5174676.1                                           | XP_015174677.1;XP_<br>015174678.1                                                          | XP_015174677.1 PREDICTED: ABC transporter F family member 4 isoform X2 [Polistes dominula];XP_015174678.1 PREDICTED: ABC transporter F family member 4 isoform X2 [Polistes dominula]                                                                                      | 3 | 3 | 3 | 3 | 13,019 | 0        | 0        | 0        | 0       |
| XP_01517473<br>0.1                                                                                 | XP_015174730.1                                                                             | XP_015174730.1 PREDICTED: zinc carboxypeptidase-like [Polistes dominula]                                                                                                                                                                                                   | 1 | 3 | 3 | 3 | 46,497 | 0        | 95555000 | 9281100  | 7502000 |
| XP_01517485<br>4.1                                                                                 | XP_015174854.1                                                                             | XP_015174854.1 PREDICTED: protein disulfide-isomerase A6 [Polistes dominula]                                                                                                                                                                                               | 1 | 3 | 3 | 3 | 47,794 | 6867400  | 0        | 7709100  | 0       |
| XP_01517503<br>0.1                                                                                 | XP_015175030.1                                                                             | XP_015175030.1 PREDICTED: acylphosphatase-1-like [Polistes dominula]                                                                                                                                                                                                       | 1 | 3 | 3 | 3 | 12,4   | 5014300  | 51512000 | 29377000 | 5687500 |
| XP_01517506<br>7.1                                                                                 | XP_015175067.1                                                                             | XP_015175067.1 PREDICTED: riboflavin kinase, partial [Polistes dominula]                                                                                                                                                                                                   | 1 | 3 | 3 | 3 | 16,261 | 0        | 57189000 | 0        | 0       |
| XP_01517531<br>7.1;XP_01517<br>5316.1;XP_01<br>5175315.1;XP<br>_015175314.1                        | XP_015175317.1;XP_<br>015175316.1;XP_015<br>175315.1;XP_015175<br>314.1                    | XP_015175317.1 PREDICTED: matrix metalloproteinase-14 isoform X4 [Polistes dominula];XP_015175316.1 PREDICTED: matrix metalloproteinase-14 isoform X3 [Polistes dominula];XP_015175315.1 PREDICTED: matrix metalloproteinase-14 isoform X2 [Polistes dominula];X           | 4 | 3 | 3 | 3 | 59,967 | 10684000 | 0        | 0        | 0       |
| XP_01517621<br>7.1                                                                                 | XP_015176217.1                                                                             | XP_015176217.1 PREDICTED: succinyl-CoA ligase [ADP/GDP-forming] subunit alpha, mitochondrial [Polistes dominula]                                                                                                                                                           | 1 | 3 | 3 | 3 | 35,232 | 14721000 | 0        | 51945000 | 0       |
| XP_01517667<br>6.1;XP_01517<br>6675.1                                                              | XP_015176676.1;XP_<br>015176675.1                                                          | XP_015176676.1 PREDICTED: V-type proton ATPase catalytic subunit A [Polistes dominula];XP_015176675.1 PREDICTED: V-type proton ATPase catalytic subunit A [Polistes dominula]                                                                                              | 2 | 3 | 3 | 3 | 68,342 | 9161700  | 0        | 0        | 0       |
| XP_01517692<br>8.1                                                                                 | XP_015176928.1                                                                             | XP_015176928.1 PREDICTED: V-type proton ATPase subunit E [Polistes dominula]                                                                                                                                                                                               | 1 | 3 | 3 | 3 | 26,204 | 22092000 | 0        | 0        | 3290200 |
| XP_01517745<br>5.1;XP_01517<br>7454.1;XP_01<br>5177453.1;XP<br>_015177452.1                        | XP_015177455.1;XP_<br>015177454.1;XP_015<br>177453.1;XP_015177<br>452.1                    | XP_015177455.1 PREDICTED: poly(rC)-binding protein 3-like isoform X3 [Polistes dominula];XP_015177454.1 PREDICTED: poly(rC)-binding protein 4-like isoform X2 [Polistes dominula];XP_015177453.1 PREDICTED: poly(rC)-binding protein 4-like isoform X1 [Polistes dominula] | 4 | 3 | 3 | 3 | 48,525 | 0        | 4666300  | 0        | 0       |
| XP_01517843<br>1.1;XP_01517<br>8430.1;XP_01<br>5178429.1;XP<br>_015178428.1<br>;XP_0151784<br>27.1 | XP_015178431.1;XP_<br>015178430.1;XP_015<br>178429.1;XP_015178<br>428.1;XP_015178427.<br>1 | XP_015178431.1 PREDICTED: annexin B11-like isoform X3 [Polistes dominula];XP_015178430.1 PREDICTED: annexin B9-like isoform X2 [Polistes dominula];XP_015178429.1 PREDICTED: annexin B9-like isoform X1 [Polistes dominula];XP_015178428.1 PREDICTED: annexin B9           | 5 | 3 | 3 | 3 | 35,709 | 0        | 0        | 0        | 0       |
| XP_01517847<br>4.1                                                                                 | XP_015178474.1                                                                             | XP_015178474.1 PREDICTED: vanin-like protein 2 [Polistes dominula]                                                                                                                                                                                                         | 1 | 3 | 3 | 3 | 59,719 | 3299100  | 21862000 | 0        | 4314300 |

|                                               |                                              |                                                                                                                                                                                                                                                    |   |    |   |   |        |           |          |          |          |
|-----------------------------------------------|----------------------------------------------|----------------------------------------------------------------------------------------------------------------------------------------------------------------------------------------------------------------------------------------------------|---|----|---|---|--------|-----------|----------|----------|----------|
| XP_01517936.4.1                               | XP_015179364.1                               | XP_015179364.1 PREDICTED: short/branched chain specific acyl-CoA dehydrogenase, mitochondrial [Polistes dominula]                                                                                                                                  | 1 | 3  | 3 | 3 | 45,667 | 6113600   | 9774700  | 0        | 0        |
| XP_01517942.4.1                               | XP_015179424.1                               | XP_015179424.1 PREDICTED: proliferation-associated protein 2G4 [Polistes dominula]                                                                                                                                                                 | 1 | 3  | 3 | 3 | 43,499 | 0         | 28777000 | 0        | 0        |
| XP_01518061.3.1                               | XP_015180613.1                               | XP_015180613.1 PREDICTED: pyridoxine-5-phosphate oxidase-like [Polistes dominula]                                                                                                                                                                  | 1 | 3  | 3 | 3 | 28,153 | 0         | 27627000 | 4009900  | 0        |
| XP_01518070.1.1                               | XP_015180701.1                               | XP_015180701.1 PREDICTED: basigin [Polistes dominula]                                                                                                                                                                                              | 1 | 3  | 3 | 3 | 39,836 | 17263000  | 12706000 | 6121500  | 4015400  |
| XP_01518107.1.1;XP_015181070.1;XP_015181069.1 | XP_015181071.1;XP_015181070.1;XP_015181069.1 | XP_015181071.1 PREDICTED: cytosolic non-specific dipeptidase [Polistes dominula];XP_015181070.1 PREDICTED: cytosolic non-specific dipeptidase [Polistes dominula];XP_015181069.1 PREDICTED: cytosolic non-specific dipeptidase [Polistes dominula] | 3 | 3  | 3 | 3 | 54,294 | 6787400   | 18981000 | 11960000 | 0        |
| XP_01518141.3.1;XP_015181412.1                | XP_015181413.1;XP_015181412.1                | XP_015181413.1 PREDICTED: V-type proton ATPase subunit H isoform X2 [Polistes dominula];XP_015181412.1 PREDICTED: V-type proton ATPase subunit H isoform X1 [Polistes dominula]                                                                    | 2 | 3  | 3 | 3 | 56,338 | 0         | 0        | 0        | 0        |
| XP_01518148.8.1                               | XP_015181488.1                               | XP_015181488.1 PREDICTED: trypsin-7-like [Polistes dominula]                                                                                                                                                                                       | 1 | 3  | 3 | 3 | 38,836 | 0         | 0        | 0        | 26620000 |
| XP_01518154.2.1;XP_015181541.1                | XP_015181542.1;XP_015181541.1                | XP_015181542.1 PREDICTED: uncharacterized protein LOC107069082 isoform X2 [Polistes dominula];XP_015181541.1 PREDICTED: uncharacterized protein LOC107069082 isoform X1 [Polistes dominula]                                                        | 2 | 3  | 3 | 3 | 29,933 | 0         | 0        | 18084000 | 3922500  |
| XP_01518176.6.1                               | XP_015181766.1                               | XP_015181766.1 PREDICTED: myophilin [Polistes dominula]                                                                                                                                                                                            | 1 | 3  | 3 | 3 | 19,016 | 0         | 0        | 16955000 | 0        |
| XP_01518190.0.1                               | XP_015181900.1                               | XP_015181900.1 PREDICTED: sepiapterin reductase [Polistes dominula]                                                                                                                                                                                | 1 | 3  | 3 | 3 | 28,967 | 18855000  | 3153700  | 0        | 0        |
| XP_01518197.1.1;XP_015181970.1                | XP_015181971.1;XP_015181970.1                | XP_015181971.1 PREDICTED: sorbitol dehydrogenase-like isoform X2 [Polistes dominula];XP_015181970.1 PREDICTED: sorbitol dehydrogenase-like isoform X1 [Polistes dominula]                                                                          | 2 | 3  | 3 | 3 | 36,908 | 0         | 0        | 0        | 9437500  |
| XP_01518239.7.1                               | XP_015182397.1                               | XP_015182397.1 PREDICTED: putative glucose-6-phosphate 1-epimerase [Polistes dominula]                                                                                                                                                             | 1 | 3  | 3 | 3 | 31,847 | 0         | 21008000 | 0        | 0        |
| XP_01518241.3.1;XP_015182412.1                | XP_015182413.1;XP_015182412.1                | XP_015182413.1 PREDICTED: probable cytochrome P450 6a14 [Polistes dominula];XP_015182412.1 PREDICTED: probable cytochrome P450 6a14 [Polistes dominula]                                                                                            | 2 | 3  | 3 | 3 | 59,834 | 29948000  | 0        | 0        | 0        |
| XP_01518247.3.1;XP_015182472.1                | XP_015182473.1;XP_015182472.1                | XP_015182473.1 PREDICTED: actin-5C [Polistes dominula];XP_015182472.1 PREDICTED: actin-5C [Polistes dominula]                                                                                                                                      | 2 | 11 | 3 | 3 | 41,821 | 144160000 | 27562000 | 0        | 2072600  |

|                                                                                                                                                                                                                                                                                                                                                    |                                                                                                                                                                                                                                                                                                                    |                                                                                                                                                                                                                                                                  |    |   |   |   |        |          |   |          |         |
|----------------------------------------------------------------------------------------------------------------------------------------------------------------------------------------------------------------------------------------------------------------------------------------------------------------------------------------------------|--------------------------------------------------------------------------------------------------------------------------------------------------------------------------------------------------------------------------------------------------------------------------------------------------------------------|------------------------------------------------------------------------------------------------------------------------------------------------------------------------------------------------------------------------------------------------------------------|----|---|---|---|--------|----------|---|----------|---------|
| XP_01518254<br>4.1;XP_01518<br>2551.1;XP_01<br>5182521.1;XP<br>_015182530.1<br>;XP_0151825<br>36.1;XP_0151<br>82515.1;XP_0<br>15182500.1;X<br>P_015182494.<br>1;XP_015182<br>488.1;XP_015<br>182470.1;XP_<br>015182461.1;<br>XP_01518258<br>4.1;XP_01518<br>2498.1;XP_01<br>5182569.1;XP<br>_015182577.1<br>;XP_0151825<br>60.1;XP_0151<br>82479.1 | XP_015182544.1;XP_<br>015182551.1;XP_015<br>182521.1;XP_015182<br>530.1;XP_015182536.<br>1;XP_015182515.1;X<br>P_015182500.1;XP_0<br>15182494.1;XP_0151<br>82488.1;XP_0151824<br>70.1;XP_015182461.1<br>;XP_015182584.1;XP<br>_015182498.1;XP_01<br>5182569.1;XP_01518<br>2577.1;XP_01518256<br>0.1;XP_015182479.1 | XP_015182544.1 PREDICTED: tropomyosin isoform X13 [Polistes dominula];XP_015182551.1 PREDICTED: tropomyosin isoform X14 [Polistes dominula];XP_015182521.1 PREDICTED: tropomyosin-2 isoform X10 [Polistes dominula];XP_015182530.1 PREDICTED: tropomyosin-2 isof | 17 | 3 | 3 | 3 | 32,504 | 2196300  | 0 | 0        | 0       |
| XP_01518321<br>4.1                                                                                                                                                                                                                                                                                                                                 | XP_015183214.1                                                                                                                                                                                                                                                                                                     | XP_015183214.1 PREDICTED: venom acid phosphatase Acph-1-like [Polistes dominula]                                                                                                                                                                                 | 1  | 3 | 3 | 3 | 46,363 | 0        | 0 | 0        | 0       |
| XP_01518322<br>6.1                                                                                                                                                                                                                                                                                                                                 | XP_015183226.1                                                                                                                                                                                                                                                                                                     | XP_015183226.1 PREDICTED: 60S ribosomal protein L23 [Polistes dominula]                                                                                                                                                                                          | 1  | 3 | 3 | 3 | 14,807 | 6334100  | 0 | 16820000 | 0       |
| XP_01518381<br>0.1                                                                                                                                                                                                                                                                                                                                 | XP_015183810.1                                                                                                                                                                                                                                                                                                     | XP_015183810.1 PREDICTED: apolipoprotein D-like [Polistes dominula]                                                                                                                                                                                              | 1  | 3 | 3 | 3 | 30,373 | 29797000 | 0 | 0        | 0       |
| XP_01518417<br>8.1                                                                                                                                                                                                                                                                                                                                 | XP_015184178.1                                                                                                                                                                                                                                                                                                     | XP_015184178.1 PREDICTED: ras suppressor protein 1 [Polistes dominula]                                                                                                                                                                                           | 1  | 3 | 3 | 3 | 32,089 | 0        | 0 | 0        | 0       |
| XP_01518424<br>0.1                                                                                                                                                                                                                                                                                                                                 | XP_015184240.1                                                                                                                                                                                                                                                                                                     | XP_015184240.1 PREDICTED: venom serine protease-like [Polistes dominula]                                                                                                                                                                                         | 1  | 3 | 3 | 3 | 44,044 | 46897000 | 0 | 0        | 2139400 |
| XP_01518424<br>4.1                                                                                                                                                                                                                                                                                                                                 | XP_015184244.1                                                                                                                                                                                                                                                                                                     | XP_015184244.1 PREDICTED: trypsin 5G1-like [Polistes dominula]                                                                                                                                                                                                   | 1  | 3 | 3 | 3 | 26,338 | 45855000 | 0 | 0        | 3359800 |
| XP_01518430<br>2.1                                                                                                                                                                                                                                                                                                                                 | XP_015184302.1                                                                                                                                                                                                                                                                                                     | XP_015184302.1 PREDICTED: calmodulin [Polistes dominula]                                                                                                                                                                                                         | 1  | 3 | 3 | 3 | 16,81  | 13538000 | 0 | 0        | 0       |
| XP_01518472<br>3.1                                                                                                                                                                                                                                                                                                                                 | XP_015184723.1                                                                                                                                                                                                                                                                                                     | XP_015184723.1 PREDICTED: uncharacterized protein LOC107070756 [Polistes dominula]                                                                                                                                                                               | 1  | 3 | 3 | 3 | 80,349 | 13236000 | 0 | 0        | 0       |

|                                                                                                                         |                                                                                                          |                                                                                                                                                                                                                                                                  |   |   |   |   |        |          |          |          |          |
|-------------------------------------------------------------------------------------------------------------------------|----------------------------------------------------------------------------------------------------------|------------------------------------------------------------------------------------------------------------------------------------------------------------------------------------------------------------------------------------------------------------------|---|---|---|---|--------|----------|----------|----------|----------|
| XP_015185451.1;XP_015185371.1;XP_015185302.1;XP_015185217.1;XP_015185139.1;XP_015185047.1;XP_015184970.1;XP_015184896.1 | XP_015185451.1;XP_015185371.1;XP_015185302.1;XP_015185217.1;XP_015185047.1;XP_015184970.1;XP_015184896.1 | XP_015185451.1 PREDICTED: protein phosphatase 1 regulatory subunit 12A isoform X8 [Polistes dominula];XP_015185371.1 PREDICTED: protein phosphatase 1 regulatory subunit 12A isoform X7 [Polistes dominula];XP_015185302.1 PREDICTED: protein phosphatase 1 regu | 8 | 3 | 3 | 3 | 109,08 | 0        | 4018600  | 0        | 0        |
| XP_015185363.1;XP_015185362.1                                                                                           | XP_015185363.1;XP_015185362.1                                                                            | XP_015185363.1 PREDICTED: FK506-binding protein 2 isoform X2 [Polistes dominula];XP_015185362.1 PREDICTED: FK506-binding protein 2 isoform X1 [Polistes dominula]                                                                                                | 2 | 3 | 3 | 3 | 25,897 | 19797000 | 0        | 0        | 0        |
| XP_015185889.1                                                                                                          | XP_015185889.1                                                                                           | XP_015185889.1 PREDICTED: glucose-6-phosphate isomerase [Polistes dominula]                                                                                                                                                                                      | 1 | 3 | 3 | 3 | 62,711 | 3847500  | 2137000  | 0        | 51414000 |
| XP_015186002.1;XP_015185996.1                                                                                           | XP_015186002.1;XP_015185996.1                                                                            | XP_015186002.1 PREDICTED: bifunctional glutamate/proline--tRNA ligase isoform X2 [Polistes dominula];XP_015185996.1 PREDICTED: bifunctional glutamate/proline--tRNA ligase isoform X1 [Polistes dominula]                                                        | 2 | 3 | 3 | 3 | 175,99 | 0        | 82185000 | 0        | 0        |
| XP_015186393.1                                                                                                          | XP_015186393.1                                                                                           | XP_015186393.1 PREDICTED: LIM and SH3 domain protein Lasp [Polistes dominula]                                                                                                                                                                                    | 1 | 3 | 3 | 3 | 35,947 | 12352000 | 3760500  | 0        | 0        |
| XP_015186552.1;XP_015186550.1;XP_015186548.1;XP_015186547.1;XP_015186544.1                                              | XP_015186553.1;XP_015186552.1;XP_015186550.1;XP_015186548.1;XP_015186547.1;XP_015186544.1                | XP_015186553.1 PREDICTED: 14-3-3 protein zeta isoform X1 [Polistes dominula];XP_015186552.1 PREDICTED: 14-3-3 protein zeta isoform X1 [Polistes dominula];XP_015186550.1 PREDICTED: 14-3-3 protein zeta isoform X1 [Polistes dominula];XP_015186549.1 PREDICTED: | 7 | 3 | 3 | 3 | 28,104 | 39665000 | 6688600  | 0        | 12162000 |
| XP_015186612.1;XP_015186611.1                                                                                           | XP_015186613.1;XP_015186612.1;XP_015186611.1                                                             | XP_015186613.1 PREDICTED: glyoxylate reductase/hydroxypyruvate reductase-like isoform X2 [Polistes dominula];XP_015186612.1 PREDICTED: glyoxylate reductase/hydroxypyruvate reductase-like isoform X2 [Polistes dominula];XP_015186611.1 PREDICTED: glyoxylate r | 3 | 3 | 3 | 3 | 35,557 | 19656000 | 12027000 | 0        | 5792800  |
| XP_015186656.1;XP_015186657.1;XP_015186659.1                                                                            | XP_015186656.1;XP_015186657.1;XP_015186659.1                                                             | XP_015186656.1 PREDICTED: alpha-crystallin B chain isoform X1 [Polistes dominula];XP_015186657.1 PREDICTED: heat shock protein beta-1 isoform X2 [Polistes dominula];XP_015186659.1 PREDICTED: heat shock protein beta-1 isoform X3 [Polistes dominula]          | 3 | 3 | 3 | 3 | 25,593 | 37506000 | 0        | 24707000 | 5537300  |
| XP_015187286.1;XP_015187285.1;XP_015187283.1;XP_015187281.1;XP_015187280.1                                              | XP_015187286.1;XP_015187285.1;XP_015187283.1;XP_015187281.1;XP_015187280.1                               | XP_015187286.1 PREDICTED: protein hu-li tai shao isoform X6 [Polistes dominula];XP_015187285.1 PREDICTED: protein hu-li tai shao isoform X5 [Polistes dominula];XP_015187283.1 PREDICTED: protein hu-li tai shao isoform X4 [Polistes dominula];XP_015187282.1 P | 6 | 3 | 3 | 3 | 77,768 | 3582400  | 14225000 | 0        | 0        |
| XP_015187330.1                                                                                                          | XP_015187330.1                                                                                           | XP_015187330.1 PREDICTED: malignant T-cell-amplified sequence 1 homolog [Polistes dominula]                                                                                                                                                                      | 1 | 3 | 3 | 3 | 20,401 | 0        | 23451000 | 0        | 0        |

|                                                                             |                                                                            |                                                                                                                                                                                                                                                                  |   |   |   |   |        |         |          |          |          |
|-----------------------------------------------------------------------------|----------------------------------------------------------------------------|------------------------------------------------------------------------------------------------------------------------------------------------------------------------------------------------------------------------------------------------------------------|---|---|---|---|--------|---------|----------|----------|----------|
| XP_01518799.9.1                                                             | XP_015187999.1                                                             | XP_015187999.1 PREDICTED: trans-1,2-dihydrobenzene-1,2-diol dehydrogenase-like [Polistes dominula]                                                                                                                                                               | 1 | 3 | 3 | 3 | 38,199 | 0       | 53134000 | 0        | 0        |
| XP_01518809.8.1                                                             | XP_015188098.1                                                             | XP_015188098.1 PREDICTED: dnaJ protein homolog 1 [Polistes dominula]                                                                                                                                                                                             | 1 | 3 | 3 | 3 | 39,017 | 0       | 0        | 2919800  | 0        |
| XP_01518894.3.1                                                             | XP_015188943.1                                                             | XP_015188943.1 PREDICTED: uncharacterized protein LOC107073050 [Polistes dominula]                                                                                                                                                                               | 1 | 3 | 3 | 3 | 29,162 | 5734800 | 14553000 | 0        | 4600000  |
| XP_01518951.4.1                                                             | XP_015189514.1                                                             | XP_015189514.1 PREDICTED: neurogenic locus notch homolog protein 1 [Polistes dominula]                                                                                                                                                                           | 1 | 3 | 3 | 3 | 44,789 | 0       | 0        | 33447000 | 0        |
| XP_01519041.5.1;XP_015190414.1;XP_015190413.1;XP_015190413.1;XP_015190412.1 | XP_015190415.1;XP_015190414.1;XP_015190413.1;XP_015190412.1                | XP_015190415.1 PREDICTED: dnaJ homolog subfamily A member 4 [Polistes dominula];XP_015190414.1 PREDICTED: dnaJ homolog subfamily A member 4 [Polistes dominula];XP_015190413.1 PREDICTED: dnaJ homolog subfamily A member 4 [Polistes dominula];XP_015190412.1 P | 4 | 3 | 3 | 3 | 44,817 | 3570500 | 7431100  | 3952700  | 3710700  |
| XP_01519062.7.1;XP_015190626.1                                              | XP_015190627.1;XP_015190626.1                                              | XP_015190627.1 PREDICTED: 3-hydroxyisobutyryl-CoA hydrolase, mitochondrial-like isoform X2 [Polistes dominula];XP_015190626.1 PREDICTED: 3-hydroxyisobutyryl-CoA hydrolase, mitochondrial-like isoform X1 [Polistes dominula]                                    | 2 | 3 | 3 | 3 | 45,178 | 4999500 | 39475000 | 0        | 4790700  |
| XP_01519074.5.1;XP_015190744.1                                              | XP_015190745.1;XP_015190744.1                                              | XP_015190745.1 PREDICTED: uncharacterized family 31 glucosidase KIAA1161 isoform X2 [Polistes dominula];XP_015190744.1 PREDICTED: uncharacterized family 31 glucosidase KIAA1161 isoform X1 [Polistes dominula]                                                  | 2 | 3 | 3 | 3 | 75,184 | 0       | 0        | 0        | 43297000 |
| XP_01519097.2.1                                                             | XP_015190972.1                                                             | XP_015190972.1 PREDICTED: omega-conotoxin-like protein 1 [Polistes dominula]                                                                                                                                                                                     | 1 | 3 | 3 | 3 | 8,7562 | 3289100 | 3322600  | 0        | 0        |
| XP_01519118.7.1;XP_015191186.1;XP_015191185.1                               | XP_015191187.1;XP_015191186.1;XP_015191185.1                               | XP_015191187.1 PREDICTED: NECAP-like protein CG9132 [Polistes dominula];XP_015191186.1 PREDICTED: NECAP-like protein CG9132 [Polistes dominula];XP_015191185.1 PREDICTED: NECAP-like protein CG9132 [Polistes dominula]                                          | 3 | 3 | 3 | 3 | 27,079 | 0       | 0        | 0        | 0        |
| XP_01517146.5.1;XP_015171464.1                                              | XP_015171465.1;XP_015171464.1                                              | XP_015171465.1 PREDICTED: delta(3,5)-Delta(2,4)-dienoyl-CoA isomerase, mitochondrial [Polistes dominula];XP_015171464.1 PREDICTED: delta(3,5)-Delta(2,4)-dienoyl-CoA isomerase, mitochondrial [Polistes dominula]                                                | 2 | 4 | 4 | 4 | 31,088 | 9266800 | 82838000 | 12478000 | 6561200  |
| XP_01517184.2.1;XP_015171841.1                                              | XP_015171842.1;XP_015171841.1                                              | XP_015171842.1 PREDICTED: leucine-rich repeat-containing protein 15-like isoform X2 [Polistes dominula];XP_015171841.1 PREDICTED: leucine-rich repeat-containing protein 15-like isoform X1 [Polistes dominula]                                                  | 2 | 4 | 4 | 4 | 75,879 | 0       | 6154000  | 8671600  | 8084800  |
| XP_01517196.1.1                                                             | XP_015171961.1                                                             | XP_015171961.1 PREDICTED: phosphoglycolate phosphatase-like [Polistes dominula]                                                                                                                                                                                  | 1 | 4 | 4 | 4 | 34,436 | 0       | 55591000 | 6671400  | 0        |
| XP_01517271.9.1;XP_015172718.1;XP_015172717.1;XP_015172716.1;XP_015172714.1 | XP_015172719.1;XP_015172718.1;XP_015172717.1;XP_015172716.1;XP_015172714.1 | XP_015172719.1 PREDICTED: oxysterol-binding protein 1 isoform X3 [Polistes dominula];XP_015172718.1 PREDICTED: oxysterol-binding protein 1 isoform X2 [Polistes dominula];XP_015172717.1 PREDICTED: oxysterol-binding protein 1 isoform X1 [Polistes dominula];X | 5 | 4 | 4 | 4 | 84,509 | 0       | 0        | 0        | 0        |

|                                                                                                    |                                                                                            |                                                                                                                                                                                                                                                                  |   |   |   |   |        |          |          |          |          |
|----------------------------------------------------------------------------------------------------|--------------------------------------------------------------------------------------------|------------------------------------------------------------------------------------------------------------------------------------------------------------------------------------------------------------------------------------------------------------------|---|---|---|---|--------|----------|----------|----------|----------|
| XP_01517291<br>2.1;XP_01517<br>2903.1;XP_01<br>5172893.1;XP<br>_015172883.1                        | XP_015172912.1;XP_<br>015172903.1;XP_015<br>172893.1;XP_015172<br>883.1                    | XP_015172912.1 PREDICTED: glutathione S-transferase 1-like [Polistes dominula];XP_015172903.1 PREDICTED: glutathione S-transferase 1-like [Polistes dominula];XP_015172893.1 PREDICTED: glutathione S-transferase 1-like [Polistes dominula];XP_015172883.1 PRED | 4 | 4 | 4 | 4 | 24,828 | 96333000 | 55809000 | 0        | 32735000 |
| XP_01517359<br>3.1                                                                                 | XP_015173593.1                                                                             | XP_015173593.1 PREDICTED: myophilin [Polistes dominula]                                                                                                                                                                                                          | 1 | 4 | 4 | 4 | 20,791 | 7805500  | 8370600  | 0        | 0        |
| XP_01517404<br>3.1;XP_01517<br>4041.1;XP_01<br>5174040.1                                           | XP_015174043.1;XP_<br>015174041.1;XP_015<br>174040.1                                       | XP_015174043.1 PREDICTED: protein yellow-like isoform X2 [Polistes dominula];XP_015174041.1 PREDICTED: protein yellow-like isoform X2 [Polistes dominula];XP_015174040.1 PREDICTED: protein yellow-like isoform X1 [Polistes dominula]                           | 3 | 4 | 4 | 4 | 49,107 | 14098000 | 13711000 | 0        | 0        |
| XP_01517462<br>0.1;XP_01517<br>4619.1;XP_01<br>5174618.1;XP<br>_015174617.1                        | XP_015174620.1;XP_<br>015174619.1;XP_015<br>174618.1;XP_015174<br>617.1                    | XP_015174620.1 PREDICTED: cAMP-dependent protein kinase type I regulatory subunit isoform X3 [Polistes dominula];XP_015174619.1 PREDICTED: cAMP-dependent protein kinase type I regulatory subunit isoform X2 [Polistes dominula];XP_015174618.1 PREDICTED: cAMP | 4 | 4 | 4 | 4 | 33,304 | 0        | 21488000 | 0        | 0        |
| XP_01517556<br>6.1                                                                                 | XP_015175566.1                                                                             | XP_015175566.1 PREDICTED: probable trans-2-enoyl-CoA reductase, mitochondrial [Polistes dominula]                                                                                                                                                                | 1 | 4 | 4 | 4 | 40,821 | 13748000 | 0        | 0        | 0        |
| XP_01517569<br>5.1                                                                                 | XP_015175695.1                                                                             | XP_015175695.1 PREDICTED: spermine oxidase-like [Polistes dominula]                                                                                                                                                                                              | 1 | 4 | 4 | 4 | 56,492 | 0        | 52831000 | 9162400  | 4129800  |
| XP_01517576<br>2.1                                                                                 | XP_015175762.1                                                                             | XP_015175762.1 PREDICTED: cytoplasmic aconitate hydratase-like [Polistes dominula]                                                                                                                                                                               | 1 | 4 | 4 | 4 | 98,732 | 0        | 7772600  | 0        | 3053000  |
| XP_01517650<br>5.1;XP_01517<br>6504.1;XP_01<br>5176503.1;XP<br>_015176501.1<br>;XP_0151765<br>00.1 | XP_015176505.1;XP_<br>015176504.1;XP_015<br>176503.1;XP_015176<br>501.1;XP_015176500.<br>1 | XP_015176505.1 PREDICTED: apoptosis-inducing factor 3 isoform X3 [Polistes dominula];XP_015176504.1 PREDICTED: apoptosis-inducing factor 3 isoform X2 [Polistes dominula];XP_015176503.1 PREDICTED: apoptosis-inducing factor 3 isoform X2 [Polistes dominula];X | 5 | 4 | 4 | 4 | 64,251 | 0        | 0        | 0        | 0        |
| XP_01517657<br>6.1;XP_01517<br>6575.1;XP_01<br>5176574.1                                           | XP_015176576.1;XP_<br>015176575.1;XP_015<br>176574.1                                       | XP_015176576.1 PREDICTED: 40S ribosomal protein S14 [Polistes dominula];XP_015176575.1 PREDICTED: 40S ribosomal protein S14 [Polistes dominula];XP_015176574.1 PREDICTED: 40S ribosomal protein S14 [Polistes dominula]                                          | 3 | 4 | 4 | 4 | 16,205 | 12273000 | 45963000 | 17300000 | 0        |

|                                                                                                                                                                                                                                                                                                                                                                                              |                                                                                                                                                                                                                                                                                                                                                          |                                                                                                                                                                                                                                                                  |    |   |   |   |        |          |          |          |         |
|----------------------------------------------------------------------------------------------------------------------------------------------------------------------------------------------------------------------------------------------------------------------------------------------------------------------------------------------------------------------------------------------|----------------------------------------------------------------------------------------------------------------------------------------------------------------------------------------------------------------------------------------------------------------------------------------------------------------------------------------------------------|------------------------------------------------------------------------------------------------------------------------------------------------------------------------------------------------------------------------------------------------------------------|----|---|---|---|--------|----------|----------|----------|---------|
| XP_01517704<br>5.1;XP_01517<br>7047.1;XP_01<br>5177028.1;XP<br>_015177029.1<br>;XP_0151770<br>32.1;XP_0151<br>77033.1;XP_0<br>15177034.1;X<br>P_015177035.<br>1;XP_015177<br>036.1;XP_015<br>177037.1;XP_<br>015177038.1;<br>XP_01517703<br>9.1;XP_01517<br>7040.1;XP_01<br>5177041.1;XP<br>_015177043.1<br>;XP_0151770<br>44.1;XP_0151<br>77046.1;XP_0<br>15177027.1;X<br>P_015177030.<br>1 | XP_015177045.1;XP_<br>015177047.1;XP_015<br>177028.1;XP_015177<br>029.1;XP_015177032.<br>1;XP_015177033.1;X<br>P_015177034.1;XP_0<br>15177035.1;XP_0151<br>77036.1;XP_0151770<br>37.1;XP_015177038.1<br>;XP_015177039.1;XP<br>_015177040.1;XP_01<br>5177041.1;XP_01517<br>7043.1;XP_01517704<br>4.1;XP_015177046.1;<br>XP_015177027.1;XP_<br>015177030.1 | XP_015177045.1 PREDICTED: dystonin isoform X17 [Polistes dominula];XP_015177047.1 PREDICTED: dystonin isoform X19 [Polistes dominula];XP_015177028.1 PREDICTED: microtubule-actin cross-linking factor 1 isoform X2 [Polistes dominula];XP_015177029.1 PREDICTED | 19 | 4 | 4 | 4 | 598,8  | 0        | 0        | 0        | 0       |
| XP_01517752<br>3.1                                                                                                                                                                                                                                                                                                                                                                           | XP_015177523.1                                                                                                                                                                                                                                                                                                                                           | XP_015177523.1 PREDICTED: late histone H1-like [Polistes dominula]                                                                                                                                                                                               | 1  | 4 | 4 | 4 | 25,418 | 37400000 | 99607000 | 38035000 | 3108900 |
| XP_01517794<br>4.1                                                                                                                                                                                                                                                                                                                                                                           | XP_015177944.1                                                                                                                                                                                                                                                                                                                                           | XP_015177944.1 PREDICTED: arylphorin subunit beta-like [Polistes dominula]                                                                                                                                                                                       | 1  | 4 | 4 | 4 | 79,11  | 0        | 16043000 | 0        | 0       |
| XP_01517827<br>8.1                                                                                                                                                                                                                                                                                                                                                                           | XP_015178278.1                                                                                                                                                                                                                                                                                                                                           | XP_015178278.1 PREDICTED: hydroxysteroid dehydrogenase-like protein 2 [Polistes dominula]                                                                                                                                                                        | 1  | 4 | 4 | 4 | 45,397 | 12188000 | 37369000 | 0        | 0       |
| XP_01517881<br>6.1                                                                                                                                                                                                                                                                                                                                                                           | XP_015178816.1                                                                                                                                                                                                                                                                                                                                           | XP_015178816.1 PREDICTED: phosphatidylinositol transfer protein alpha isoform [Polistes dominula]                                                                                                                                                                | 1  | 4 | 4 | 4 | 31,515 | 0        | 0        | 0        | 0       |
| XP_01517890<br>8.1                                                                                                                                                                                                                                                                                                                                                                           | XP_015178908.1                                                                                                                                                                                                                                                                                                                                           | XP_015178908.1 PREDICTED: staphylococcal nuclease domain-containing protein 1 [Polistes dominula]                                                                                                                                                                | 1  | 4 | 4 | 4 | 100,76 | 0        | 39100000 | 4180900  | 0       |
| XP_01517903<br>2.1;XP_01517<br>9034.1;XP_01<br>5179033.1                                                                                                                                                                                                                                                                                                                                     | XP_015179032.1;XP_<br>015179034.1;XP_015<br>179033.1                                                                                                                                                                                                                                                                                                     | XP_015179032.1 PREDICTED: pleckstrin homology domain-containing family F member 2 isoform X1 [Polistes dominula];XP_015179034.1 PREDICTED: pleckstrin homology domain-containing family F member 2 isoform X3 [Polistes dominula];XP_015179033.1 PREDICTED: plec | 3  | 4 | 4 | 4 | 29,576 | 0        | 7913200  | 0        | 0       |
| XP_01517936<br>0.1;XP_01517<br>9362.1;XP_01<br>5179361.1;XP<br>_015184119.1                                                                                                                                                                                                                                                                                                                  | XP_015179360.1                                                                                                                                                                                                                                                                                                                                           | XP_015179360.1 PREDICTED: tubulin alpha-1 chain [Polistes dominula]                                                                                                                                                                                              | 4  | 4 | 4 | 4 | 49,964 | 16411000 | 0        | 0        | 0       |
| XP_01517936<br>3.1                                                                                                                                                                                                                                                                                                                                                                           | XP_015179363.1                                                                                                                                                                                                                                                                                                                                           | XP_015179363.1 PREDICTED: adenosylhomocysteinase [Polistes dominula]                                                                                                                                                                                             | 1  | 4 | 4 | 4 | 48,027 | 0        | 18899000 | 0        | 0       |

|                                                                                                                       |                                                                                                           |                                                                                                                                                                                                                                                                  |   |   |   |   |        |            |           |          |          |
|-----------------------------------------------------------------------------------------------------------------------|-----------------------------------------------------------------------------------------------------------|------------------------------------------------------------------------------------------------------------------------------------------------------------------------------------------------------------------------------------------------------------------|---|---|---|---|--------|------------|-----------|----------|----------|
| XP_01517945<br>0.1;XP_01517<br>9449.1                                                                                 | XP_015179450.1;XP_<br>015179449.1                                                                         | XP_015179450.1 PREDICTED: 4-hydroxybutyrate coenzyme A transferase-like [Polistes dominula];XP_015179449.1 PREDICTED: 4-hydroxybutyrate coenzyme A transferase-like [Polistes dominula]                                                                          | 2 | 4 | 4 | 4 | 52,698 | 0          | 245590000 | 0        | 0        |
| XP_01517947<br>4.1                                                                                                    | XP_015179474.1                                                                                            | XP_015179474.1 PREDICTED: TPPP family protein CG45057-like [Polistes dominula]                                                                                                                                                                                   | 1 | 4 | 4 | 4 | 23,334 | 0          | 206170000 | 0        | 0        |
| XP_01517999<br>1.1                                                                                                    | XP_015179991.1                                                                                            | XP_015179991.1 PREDICTED: 26S proteasome non-ATPase regulatory subunit 10-like [Polistes dominula]                                                                                                                                                               | 1 | 4 | 4 | 4 | 25,026 | 0          | 54689000  | 5225400  | 0        |
| XP_01518107<br>7.1;XP_01518<br>1078.1;XP_01<br>5188702.1                                                              | XP_015181077.1;XP_<br>015181078.1                                                                         | XP_015181077.1 PREDICTED: ADP-ribosylation factor 1 [Polistes dominula];XP_015181078.1 PREDICTED: ADP-ribosylation factor 1 [Polistes dominula]                                                                                                                  | 3 | 4 | 4 | 4 | 20,707 | 15761000   | 31930000  | 7516800  | 0        |
| XP_01518109<br>7.1                                                                                                    | XP_015181097.1                                                                                            | XP_015181097.1 PREDICTED: pyridoxine/pyridoxamine 5-phosphate oxidase [Polistes dominula]                                                                                                                                                                        | 1 | 4 | 4 | 4 | 26,068 | 0          | 23605000  | 0        | 0        |
| XP_01518315<br>8.1;XP_01518<br>3157.1;XP_01<br>5183156.1                                                              | XP_015183158.1;XP_<br>015183157.1;XP_015<br>183156.1                                                      | XP_015183158.1 PREDICTED: alanine aminotransferase 1 [Polistes dominula];XP_015183157.1 PREDICTED: alanine aminotransferase 1 [Polistes dominula];XP_015183156.1 PREDICTED: alanine aminotransferase 1 [Polistes dominula]                                       | 3 | 4 | 4 | 4 | 60,515 | 10883000   | 0         | 10170000 | 19787000 |
| XP_01518365<br>0.1;XP_01518<br>3649.1;XP_01<br>5183648.1;XP<br>_015183647.1<br>;XP_0151836<br>46.1;XP_0151<br>83645.1 | XP_015183650.1;XP_<br>015183649.1;XP_015<br>183648.1;XP_015183<br>647.1;XP_015183646.<br>1;XP_015183645.1 | XP_015183650.1 PREDICTED: cystathionine gamma-lyase [Polistes dominula];XP_015183649.1 PREDICTED: cystathionine gamma-lyase [Polistes dominula];XP_015183648.1 PREDICTED: cystathionine gamma-lyase [Polistes dominula];XP_015183647.1 PREDICTED: cystathionine  | 6 | 4 | 4 | 4 | 42,593 | 0          | 39854000  | 0        | 2668400  |
| XP_01518381<br>5.1;XP_01518<br>3814.1;XP_01<br>5183813.1;XP<br>_015183811.1                                           | XP_015183815.1;XP_<br>015183814.1;XP_015<br>183813.1;XP_015183<br>811.1                                   | XP_015183815.1 PREDICTED: acidic phospholipase A2 PA4-like isoform X2 [Polistes dominula];XP_015183814.1 PREDICTED: acidic phospholipase A2 PA4-like isoform X1 [Polistes dominula];XP_015183813.1 PREDICTED: acidic phospholipase A2 PA4-like isoform X1 [Polis | 4 | 4 | 4 | 4 | 25,276 | 1332900000 | 0         | 15118000 | 22399000 |
| XP_01518398<br>3.1;XP_01518<br>3981.1                                                                                 | XP_015183983.1;XP_<br>015183981.1                                                                         | XP_015183983.1 PREDICTED: probable cytochrome P450 6a13 [Polistes dominula];XP_015183981.1 PREDICTED: cytochrome P450 6a2-like [Polistes dominula]                                                                                                               | 2 | 4 | 4 | 4 | 58,273 | 21389000   | 0         | 0        | 0        |
| XP_01518399<br>2.1                                                                                                    | XP_015183992.1                                                                                            | XP_015183992.1 PREDICTED: DNA ligase 1-like [Polistes dominula]                                                                                                                                                                                                  | 1 | 4 | 4 | 4 | 76,094 | 0          | 21695000  | 3688200  | 12484000 |
| XP_01518490<br>7.1                                                                                                    | XP_015184907.1                                                                                            | XP_015184907.1 PREDICTED: ATPase inhibitor mat-2, mitochondrial-like [Polistes dominula]                                                                                                                                                                         | 1 | 4 | 4 | 4 | 11,707 | 18368000   | 188330000 | 0        | 20164000 |
| XP_01518614<br>4.1;XP_01518<br>6143.1                                                                                 | XP_015186144.1;XP_<br>015186143.1                                                                         | XP_015186144.1 PREDICTED: carnitine O-acetyltransferase-like isoform X2 [Polistes dominula];XP_015186143.1 PREDICTED: carnitine O-acetyltransferase-like isoform X1 [Polistes dominula]                                                                          | 2 | 4 | 4 | 4 | 70,658 | 0          | 5549400   | 0        | 0        |
| XP_01518627<br>5.1;XP_01518<br>6266.1                                                                                 | XP_015186275.1;XP_<br>015186266.1                                                                         | XP_015186275.1 PREDICTED: alpha-endosulfine [Polistes dominula];XP_015186266.1 PREDICTED: alpha-endosulfine [Polistes dominula]                                                                                                                                  | 2 | 4 | 4 | 4 | 11,791 | 0          | 32328000  | 0        | 0        |
| XP_01518637<br>7.1;XP_01518<br>6378.1                                                                                 | XP_015186377.1;XP_<br>015186378.1                                                                         | XP_015186377.1 PREDICTED: putative uncharacterized protein DDB_G0282129 isoform X1 [Polistes dominula];XP_015186378.1 PREDICTED: putative uncharacterized protein DDB_G0282129 isoform X2 [Polistes dominula]                                                    | 2 | 4 | 4 | 4 | 51,923 | 4789100    | 0         | 0        | 0        |

|                                                                             |                                                                         |                                                                                                                                                                                                                                                                   |   |   |   |   |        |           |           |          |          |
|-----------------------------------------------------------------------------|-------------------------------------------------------------------------|-------------------------------------------------------------------------------------------------------------------------------------------------------------------------------------------------------------------------------------------------------------------|---|---|---|---|--------|-----------|-----------|----------|----------|
| XP_01518647<br>9.1;XP_01518<br>6478.1                                       | XP_015186479.1;XP_<br>015186478.1                                       | XP_015186479.1 PREDICTED: xaa-Pro dipeptidase isoform X2 [Polistes dominula];XP_015186478.1 PREDICTED: xaa-Pro dipeptidase isoform X1 [Polistes dominula]                                                                                                         | 2 | 4 | 4 | 4 | 54,906 | 0         | 0         | 10400000 | 0        |
| XP_01518721<br>8.1;XP_01518<br>7217.1;XP_01<br>5187215.1;XP<br>_015187214.1 | XP_015187218.1;XP_<br>015187217.1;XP_015<br>187215.1;XP_015187<br>214.1 | XP_015187218.1 PREDICTED: kynurenine--oxoglutarate transaminase 3 isoform X3 [Polistes dominula];XP_015187217.1 PREDICTED: kynurenine--oxoglutarate transaminase 3 isoform X3 [Polistes dominula];XP_015187215.1 PREDICTED: kynurenine--oxoglutarate transaminase | 4 | 4 | 4 | 4 | 51,131 | 0         | 49358000  | 0        | 0        |
| XP_01518811<br>4.1;XP_01518<br>8113.1                                       | XP_015188114.1;XP_<br>015188113.1                                       | XP_015188114.1 PREDICTED: uncharacterized protein LOC107072577 isoform X2 [Polistes dominula];XP_015188113.1 PREDICTED: uncharacterized protein LOC107072577 isoform X1 [Polistes dominula]                                                                       | 2 | 4 | 4 | 4 | 36,537 | 165710000 | 0         | 31124000 | 25773000 |
| XP_01518860<br>8.1;XP_01518<br>8607.1;XP_01<br>5188605.1                    | XP_015188608.1;XP_<br>015188607.1;XP_015<br>188605.1                    | XP_015188608.1 PREDICTED: pyrroline-5-carboxylate reductase [Polistes dominula];XP_015188607.1 PREDICTED: pyrroline-5-carboxylate reductase [Polistes dominula];XP_015188605.1 PREDICTED: pyrroline-5-carboxylate reductase [Polistes dominula]                   | 3 | 4 | 4 | 4 | 34,524 | 54549000  | 0         | 0        | 0        |
| XP_01518885<br>4.1                                                          | XP_015188854.1                                                          | XP_015188854.1 PREDICTED: peroxiredoxin-like [Polistes dominula]                                                                                                                                                                                                  | 1 | 5 | 4 | 4 | 26,588 | 7711500   | 0         | 41091000 | 25534000 |
| XP_01518999<br>7.1;XP_01518<br>9996.1                                       | XP_015189997.1;XP_<br>015189996.1                                       | XP_015189997.1 PREDICTED: farnesyl pyrophosphate synthase isoform X2 [Polistes dominula];XP_015189996.1 PREDICTED: farnesyl pyrophosphate synthase isoform X1 [Polistes dominula]                                                                                 | 2 | 4 | 4 | 4 | 46,528 | 4646400   | 9975500   | 5265500  | 2721200  |
| XP_01519050<br>7.1;XP_01519<br>0499.1                                       | XP_015190507.1;XP_<br>015190499.1                                       | XP_015190507.1 PREDICTED: uncharacterized protein DDB_G0285917-like [Polistes dominula];XP_015190499.1 PREDICTED: uncharacterized protein DDB_G0285917-like [Polistes dominula]                                                                                   | 2 | 4 | 4 | 4 | 26,92  | 0         | 0         | 0        | 0        |
| XP_01519050<br>6.1                                                          | XP_015190506.1                                                          | XP_015190506.1 PREDICTED: protein lethal(2)essential for life-like [Polistes dominula]                                                                                                                                                                            | 1 | 4 | 4 | 4 | 20,408 | 60823000  | 0         | 0        | 0        |
| XP_01519067<br>6.1                                                          | XP_015190676.1                                                          | XP_015190676.1 PREDICTED: beta-hexosaminidase subunit beta-like [Polistes dominula]                                                                                                                                                                               | 1 | 4 | 4 | 4 | 62,941 | 0         | 7616000   | 0        | 0        |
| XP_01519085<br>1.1;XP_01519<br>0850.1;XP_01<br>5190849.1                    | XP_015190851.1;XP_<br>015190850.1;XP_015<br>190849.1                    | XP_015190851.1 PREDICTED: phospholipase D3-like isoform X2 [Polistes dominula];XP_015190850.1 PREDICTED: phospholipase D3-like isoform X1 [Polistes dominula];XP_015190849.1 PREDICTED: phospholipase D3-like isoform X1 [Polistes dominula]                      | 3 | 4 | 4 | 4 | 68,374 | 0         | 4103000   | 0        | 0        |
| XP_01519087<br>5.1                                                          | XP_015190875.1                                                          | XP_015190875.1 PREDICTED: lysosomal Pro-X carboxypeptidase [Polistes dominula]                                                                                                                                                                                    | 1 | 4 | 4 | 4 | 57,11  | 49236000  | 0         | 0        | 0        |
| XP_01517143<br>8.1;XP_01517<br>1430.1;XP_01<br>5171422.1                    | XP_015171438.1;XP_<br>015171430.1;XP_015<br>171422.1                    | XP_015171438.1 PREDICTED: protein-glutamate O-methyltransferase-like isoform X3 [Polistes dominula];XP_015171430.1 PREDICTED: protein-glutamate O-methyltransferase-like isoform X2 [Polistes dominula];XP_015171422.1 PREDICTED: protein-glutamate O-methyltran  | 3 | 5 | 5 | 5 | 50,726 | 0         | 41937000  | 0        | 0        |
| XP_01517153<br>6.1                                                          | XP_015171536.1                                                          | XP_015171536.1 PREDICTED: cAMP-dependent protein kinase catalytic subunit [Polistes dominula]                                                                                                                                                                     | 1 | 5 | 5 | 5 | 40,783 | 0         | 13369000  | 0        | 0        |
| XP_01517155<br>2.1                                                          | XP_015171552.1                                                          | XP_015171552.1 PREDICTED: ubiquitin-conjugating enzyme E2 L3 [Polistes dominula]                                                                                                                                                                                  | 1 | 5 | 5 | 5 | 18,131 | 11291000  | 105090000 | 6216300  | 20221000 |
| XP_01517174<br>0.1                                                          | XP_015171740.1                                                          | XP_015171740.1 PREDICTED: probable methylmalonate-semialdehyde dehydrogenase [acylating], mitochondrial [Polistes dominula]                                                                                                                                       | 1 | 5 | 5 | 5 | 56,389 | 41571000  | 0         | 0        | 0        |
| XP_01517217<br>1.1                                                          | XP_015172171.1                                                          | XP_015172171.1 PREDICTED: phosphoglycerate kinase [Polistes dominula]                                                                                                                                                                                             | 1 | 5 | 5 | 5 | 44,737 | 8717300   | 0         | 0        | 19521000 |
| XP_01517250<br>5.1                                                          | XP_015172505.1                                                          | XP_015172505.1 PREDICTED: ester hydrolase C11orf54 homolog [Polistes dominula]                                                                                                                                                                                    | 1 | 5 | 5 | 5 | 35,472 | 8483600   | 150070000 | 48839000 | 14845000 |

|                                                              |                                                             |                                                                                                                                                                                                                                                                                                                                                                                                                             |   |   |   |   |        |          |           |          |           |
|--------------------------------------------------------------|-------------------------------------------------------------|-----------------------------------------------------------------------------------------------------------------------------------------------------------------------------------------------------------------------------------------------------------------------------------------------------------------------------------------------------------------------------------------------------------------------------|---|---|---|---|--------|----------|-----------|----------|-----------|
| XP_01517262.2.1                                              | XP_015172622.1                                              | XP_015172622.1 PREDICTED: 3-hydroxyacyl-CoA dehydrogenase type-2-like [Polistes dominula]                                                                                                                                                                                                                                                                                                                                   | 1 | 7 | 5 | 5 | 27,095 | 43105000 | 130710000 | 44170000 | 43229000  |
| XP_01517376.7.1;XP_015173766.1;XP_015173765.1                | XP_015173767.1;XP_015173766.1;XP_015173765.1                | XP_015173767.1 PREDICTED: membrane metallo-endopeptidase-like 1 isoform X3 [Polistes dominula];XP_015173766.1 PREDICTED: neprilysin isoform X2 [Polistes dominula];XP_015173765.1 PREDICTED: neprilysin isoform X1 [Polistes dominula]                                                                                                                                                                                      | 3 | 5 | 5 | 5 | 86,49  | 45275000 | 0         | 20402000 | 0         |
| XP_01517394.6.1;XP_015173945.1;XP_015173944.1;XP_015173943.1 | XP_015173946.1;XP_015173945.1;XP_015173944.1;XP_015173943.1 | XP_015173946.1 PREDICTED: calcium-transporting ATPase sarcoplasmic/endoplasmic reticulum type isoform X2 [Polistes dominula];XP_015173945.1 PREDICTED: calcium-transporting ATPase sarcoplasmic/endoplasmic reticulum type isoform X1 [Polistes dominula];XP_015                                                                                                                                                            | 4 | 5 | 5 | 5 | 109,93 | 2756200  | 0         | 0        | 151220000 |
| XP_01517410.4.1                                              | XP_015174104.1                                              | XP_015174104.1 PREDICTED: eukaryotic translation initiation factor 2 subunit 3, Y-linked [Polistes dominula]                                                                                                                                                                                                                                                                                                                | 1 | 5 | 5 | 5 | 51,347 | 0        | 0         | 0        | 0         |
| XP_01517545.2.1                                              | XP_015175452.1                                              | XP_015175452.1 PREDICTED: ubiquitin-like modifier-activating enzyme 1 [Polistes dominula]                                                                                                                                                                                                                                                                                                                                   | 1 | 5 | 5 | 5 | 117,32 | 0        | 0         | 0        | 0         |
| XP_01517583.9.1;XP_015175838.1                               | XP_015175839.1;XP_015175838.1                               | XP_015175839.1 PREDICTED: BAG domain-containing protein Samui isoform X2 [Polistes dominula];XP_015175838.1 PREDICTED: BAG domain-containing protein Samui isoform X1 [Polistes dominula]                                                                                                                                                                                                                                   | 2 | 5 | 5 | 5 | 79,098 | 0        | 98502000  | 11092000 | 4940200   |
| XP_01517624.6.1                                              | XP_015176246.1                                              | XP_015176246.1 PREDICTED: transmembrane protease serine 9-like [Polistes dominula]                                                                                                                                                                                                                                                                                                                                          | 1 | 5 | 5 | 5 | 88,322 | 0        | 111410000 | 27037000 | 123690000 |
| XP_01517633.4.1                                              | XP_015176334.1                                              | XP_015176334.1 PREDICTED: LOW QUALITY PROTEIN: protein Red-like [Polistes dominula]                                                                                                                                                                                                                                                                                                                                         | 1 | 5 | 5 | 5 | 100,96 | 1606400  | 56913000  | 0        | 6110000   |
| XP_01517680.8.1                                              | XP_015176808.1                                              | XP_015176808.1 PREDICTED: bleomycin hydrolase [Polistes dominula]                                                                                                                                                                                                                                                                                                                                                           | 1 | 5 | 5 | 5 | 52,087 | 0        | 0         | 0        | 10929000  |
| XP_01517681.5.1                                              | XP_015176815.1                                              | XP_015176815.1 PREDICTED: lambda-crystallin homolog [Polistes dominula]                                                                                                                                                                                                                                                                                                                                                     | 1 | 5 | 5 | 5 | 35,361 | 2743000  | 0         | 0        | 19621000  |
| XP_01517683.0.1;XP_015176829.1                               | XP_015176830.1;XP_015176829.1                               | XP_015176830.1 PREDICTED: fumarate hydratase, mitochondrial-like isoform X2 [Polistes dominula];XP_015176829.1 PREDICTED: fumarate hydratase, mitochondrial-like isoform X1 [Polistes dominula]                                                                                                                                                                                                                             | 2 | 5 | 5 | 5 | 51,303 | 4760200  | 0         | 0        | 50277000  |
| XP_01517692.1.1;XP_015176920.1;XP_015176919.1                | XP_015176921.1;XP_015176920.1;XP_015176919.1                | XP_015176921.1 PREDICTED: fructose-1,6-bisphosphatase 1 [Polistes dominula];XP_015176920.1 PREDICTED: fructose-1,6-bisphosphatase 1 [Polistes dominula];XP_015176919.1 PREDICTED: fructose-1,6-bisphosphatase 1 [Polistes dominula]                                                                                                                                                                                         | 3 | 5 | 5 | 5 | 37,122 | 0        | 11730000  | 7093700  | 0         |
| XP_01517749.8.1;XP_015177497.1;XP_015177496.1;XP_015177495.1 | XP_015177498.1;XP_015177497.1;XP_015177496.1;XP_015177495.1 | XP_015177498.1 PREDICTED: xaa-Pro aminopeptidase 1-like isoform X2 [Polistes dominula];XP_015177497.1 PREDICTED: xaa-Pro aminopeptidase 1-like isoform X2 [Polistes dominula];XP_015177496.1 PREDICTED: xaa-Pro aminopeptidase 1-like isoform X2 [Polistes dominula];XP_015177495.1 PREDICTED: xaa-Pro aminopeptidase 1-like isoform X2 [Polistes dominula]                                                                 | 4 | 5 | 5 | 5 | 70,221 | 0        | 55300000  | 0        | 0         |
| XP_01517921.9.1                                              | XP_015179219.1                                              | XP_015179219.1 PREDICTED: phosphoacetylglucosamine mutase [Polistes dominula]                                                                                                                                                                                                                                                                                                                                               | 1 | 5 | 5 | 5 | 60,477 | 0        | 3122700   | 0        | 0         |
| XP_01518022.1.1;XP_015180220.1;XP_015180221.1;XP_015180222.1 | XP_015180221.1;XP_015180220.1;XP_015180221.1;XP_015180222.1 | XP_015180221.1 PREDICTED: probable serine/threonine-protein kinase clkA isoform X1 [Polistes dominula];XP_015180220.1 PREDICTED: probable serine/threonine-protein kinase clkA isoform X1 [Polistes dominula];XP_015180221.1 PREDICTED: probable serine/threonine-protein kinase clkA isoform X1 [Polistes dominula];XP_015180222.1 PREDICTED: probable serine/threonine-protein kinase clkA isoform X1 [Polistes dominula] | 4 | 5 | 5 | 5 | 32,4   | 26176000 | 30528000  | 3463200  | 4697800   |
| XP_01518024.0.1                                              | XP_015180240.1                                              | XP_015180240.1 PREDICTED: succinyl-CoA:3-ketoacid coenzyme A transferase 1, mitochondrial [Polistes dominula]                                                                                                                                                                                                                                                                                                               | 1 | 5 | 5 | 5 | 58,542 | 0        | 23267000  | 0        | 0         |

|                                                                                                                                          |                                                                                                                              |                                                                                                                                                                                                                                                                           |   |    |   |   |        |           |           |           |           |
|------------------------------------------------------------------------------------------------------------------------------------------|------------------------------------------------------------------------------------------------------------------------------|---------------------------------------------------------------------------------------------------------------------------------------------------------------------------------------------------------------------------------------------------------------------------|---|----|---|---|--------|-----------|-----------|-----------|-----------|
| XP_01518029<br>7.1;XP_01518<br>0296.1                                                                                                    | XP_015180297.1;XP_<br>015180296.1                                                                                            | XP_015180297.1 PREDICTED: UPF0553 protein C9orf64 homolog<br>isoform X2 [Polistes dominula];XP_015180296.1 PREDICTED: UPF0553<br>protein C9orf64 homolog isoform X1 [Polistes dominula]                                                                                   | 2 | 5  | 5 | 5 | 36,939 | 0         | 16346000  | 0         | 4855100   |
| XP_01518072<br>9.1                                                                                                                       | XP_015180729.1                                                                                                               | XP_015180729.1 PREDICTED: ejaculatory bulb-specific protein 3 [Polistes<br>dominula]                                                                                                                                                                                      | 1 | 5  | 5 | 5 | 14,158 | 26915000  | 153680000 | 22652000  | 0         |
| XP_01518077<br>9.1                                                                                                                       | XP_015180779.1                                                                                                               | XP_015180779.1 PREDICTED: enolase [Polistes dominula]                                                                                                                                                                                                                     | 1 | 5  | 5 | 5 | 46,982 | 29093000  | 67668000  | 0         | 190000000 |
| XP_01518125<br>0.1;XP_01518<br>1249.1;XP_01<br>5181248.1                                                                                 | XP_015181250.1;XP_<br>015181249.1;XP_015<br>181248.1                                                                         | XP_015181250.1 PREDICTED: protein D2-like isoform X2 [Polistes<br>dominula];XP_015181249.1 PREDICTED: protein D2-like isoform X2<br>[Polistes dominula];XP_015181248.1 PREDICTED: protein D2-like<br>isoform X1 [Polistes dominula]                                       | 3 | 5  | 5 | 5 | 20,796 | 23208000  | 18492000  | 0         | 0         |
| XP_01518129<br>4.1                                                                                                                       | XP_015181294.1                                                                                                               | XP_015181294.1 PREDICTED: farnesol dehydrogenase-like [Polistes<br>dominula]                                                                                                                                                                                              | 1 | 5  | 5 | 4 | 27,878 | 259130000 | 0         | 0         | 2230100   |
| XP_01518280<br>8.1                                                                                                                       | XP_015182808.1                                                                                                               | XP_015182808.1 PREDICTED: protein SGT1 homolog [Polistes dominula]                                                                                                                                                                                                        | 1 | 5  | 5 | 5 | 24,431 | 0         | 26793000  | 0         | 0         |
| XP_01518286<br>5.1                                                                                                                       | XP_015182865.1                                                                                                               | XP_015182865.1 PREDICTED: thioredoxin-2 [Polistes dominula]                                                                                                                                                                                                               | 1 | 5  | 5 | 5 | 12,084 | 169240000 | 146170000 | 196000000 | 174530000 |
| XP_01518299<br>7.1;XP_01518<br>2996.1                                                                                                    | XP_015182997.1;XP_<br>015182996.1                                                                                            | XP_015182997.1 PREDICTED: lactoylglutathione lyase [Polistes<br>dominula];XP_015182996.1 PREDICTED: lactoylglutathione lyase<br>[Polistes dominula]                                                                                                                       | 2 | 5  | 5 | 5 | 20,973 | 0         | 60860000  | 0         | 10503000  |
| XP_01518329<br>1.1;XP_01518<br>3290.1;XP_01<br>5183295.1;XP<br>_015183294.1<br>;XP_0151832<br>92.1;XP_0151<br>83296.1;XP_0<br>15183293.1 | XP_015183291.1;XP_<br>015183290.1;XP_015<br>183295.1;XP_015183<br>294.1;XP_015183292.<br>1;XP_015183296.1;X<br>P_015183293.1 | XP_015183291.1 PREDICTED: twitchin isoform X2 [Polistes<br>dominula];XP_015183290.1 PREDICTED: twitchin isoform X1 [Polistes<br>dominula];XP_015183295.1 PREDICTED: twitchin isoform X6 [Polistes<br>dominula];XP_015183294.1 PREDICTED: twitchin isoform X5 [Polistes do | 7 | 25 | 5 | 5 | 872,58 | 0         | 28842000  | 19581000  | 0         |
| XP_01518331<br>5.1                                                                                                                       | XP_015183315.1                                                                                                               | XP_015183315.1 PREDICTED: uncharacterized protein LOC107070028<br>[Polistes dominula]                                                                                                                                                                                     | 1 | 5  | 5 | 3 | 118,77 | 0         | 0         | 0         | 37101000  |
| XP_01518369<br>4.1;XP_01518<br>3693.1;XP_01<br>5183692.1;XP<br>_015183691.1<br>;XP_0151836<br>89.1;XP_0151<br>83688.1;XP_0<br>15183687.1 | XP_015183694.1;XP_<br>015183693.1;XP_015<br>183692.1;XP_015183<br>691.1;XP_015183689.<br>1;XP_015183688.1;X<br>P_015183687.1 | XP_015183694.1 PREDICTED: spectrin beta chain isoform X5 [Polistes<br>dominula];XP_015183693.1 PREDICTED: spectrin beta chain isoform X4<br>[Polistes dominula];XP_015183692.1 PREDICTED: spectrin beta chain<br>isoform X3 [Polistes dominula];XP_015183691.1 PREDICTED: | 7 | 5  | 5 | 5 | 266,11 | 29203000  | 5943000   | 0         | 6698000   |
| XP_01518424<br>5.1                                                                                                                       | XP_015184245.1                                                                                                               | XP_015184245.1 PREDICTED: acyl-CoA synthetase family member 2,<br>mitochondrial [Polistes dominula]                                                                                                                                                                       | 1 | 5  | 5 | 5 | 67,886 | 63711000  | 0         | 0         | 0         |

|                                                                             |                                                                            |                                                                                                                                                                                                                                                                  |   |   |   |   |        |           |           |          |           |
|-----------------------------------------------------------------------------|----------------------------------------------------------------------------|------------------------------------------------------------------------------------------------------------------------------------------------------------------------------------------------------------------------------------------------------------------|---|---|---|---|--------|-----------|-----------|----------|-----------|
| XP_01518685.1;XP_015186856.1;XP_015186855.1;XP_015186854.1;XP_015186853.1   | XP_015186858.1;XP_015186856.1;XP_015186855.1;XP_015186854.1;XP_015186853.1 | XP_015186858.1 PREDICTED: annexin B9-like isoform X1 [Polistes dominula];XP_015186856.1 PREDICTED: annexin B9-like isoform X1 [Polistes dominula];XP_015186855.1 PREDICTED: annexin B9-like isoform X3 [Polistes dominula];XP_015186854.1 PREDICTED: annexin B9- | 5 | 5 | 5 | 5 | 35,687 | 46905000  | 0         | 0        | 0         |
| XP_01518724.9.1                                                             | XP_015187249.1                                                             | XP_015187249.1 PREDICTED: venom serine carboxypeptidase [Polistes dominula]                                                                                                                                                                                      | 1 | 5 | 5 | 5 | 53,443 | 23592000  | 10662000  | 23722000 | 0         |
| XP_01518760.3.1                                                             | XP_015187603.1                                                             | XP_015187603.1 PREDICTED: uncharacterized protein LOC107072304 [Polistes dominula]                                                                                                                                                                               | 1 | 5 | 5 | 5 | 103,15 | 0         | 55843000  | 0        | 0         |
| XP_01518773.3.1                                                             | XP_015187733.1                                                             | XP_015187733.1 PREDICTED: carbonyl reductase [NADPH] 1-like [Polistes dominula]                                                                                                                                                                                  | 1 | 5 | 5 | 5 | 30,552 | 22627000  | 0         | 0        | 43968000  |
| XP_01518795.9.1                                                             | XP_015187959.1                                                             | XP_015187959.1 PREDICTED: dihydrolipoyllysine-residue succinyltransferase component of 2-oxoglutarate dehydrogenase complex, mitochondrial [Polistes dominula]                                                                                                   | 1 | 5 | 5 | 5 | 52,973 | 0         | 0         | 45234000 | 4212000   |
| XP_01517179.3.1                                                             | XP_015171793.1                                                             | XP_015171793.1 PREDICTED: dehydrogenase/reductase SDR family member 11-like [Polistes dominula]                                                                                                                                                                  | 1 | 6 | 6 | 6 | 28,411 | 110010000 | 2285100   | 0        | 31056000  |
| XP_01517309.2.1                                                             | XP_015173092.1                                                             | XP_015173092.1 PREDICTED: protein lethal(2)essential for life-like [Polistes dominula]                                                                                                                                                                           | 1 | 6 | 6 | 6 | 23,025 | 174320000 | 63369000  | 61669000 | 17503000  |
| XP_01517322.1.1                                                             | XP_015173221.1                                                             | XP_015173221.1 PREDICTED: maltase 1-like [Polistes dominula]                                                                                                                                                                                                     | 1 | 6 | 6 | 5 | 65,465 | 0         | 13518000  | 0        | 134720000 |
| XP_01517343.4.1;XP_015173433.1;XP_015173431.1;XP_015173430.1                | XP_015173434.1;XP_015173433.1;XP_015173431.1;XP_015173430.1                | XP_015173434.1 PREDICTED: amphiphysin isoform X4 [Polistes dominula];XP_015173433.1 PREDICTED: myc box-dependent-interacting protein 1 isoform X3 [Polistes dominula];XP_015173431.1 PREDICTED: amphiphysin isoform X2 [Polistes dominula];XP_015173430.1 PREDIC | 4 | 6 | 6 | 6 | 40,284 | 0         | 144810000 | 0        | 5503900   |
| XP_01517438.0.1                                                             | XP_015174380.1                                                             | XP_015174380.1 PREDICTED: multifunctional protein ADE2 [Polistes dominula]                                                                                                                                                                                       | 1 | 6 | 6 | 6 | 47,445 | 0         | 8677900   | 0        | 0         |
| XP_01517495.6.1                                                             | XP_015174956.1                                                             | XP_015174956.1 PREDICTED: 10 kDa heat shock protein, mitochondrial [Polistes dominula]                                                                                                                                                                           | 1 | 6 | 6 | 6 | 11,56  | 353500000 | 2895400   | 34303000 | 0         |
| XP_01517545.9.1                                                             | XP_015175459.1                                                             | XP_015175459.1 PREDICTED: superoxide dismutase [Cu-Zn] [Polistes dominula]                                                                                                                                                                                       | 1 | 6 | 6 | 6 | 15,87  | 105300000 | 8636200   | 15966000 | 34609000  |
| XP_01517550.0.1                                                             | XP_015175500.1                                                             | XP_015175500.1 PREDICTED: chymotrypsin-2-like [Polistes dominula]                                                                                                                                                                                                | 1 | 6 | 6 | 6 | 27,119 | 0         | 42271000  | 0        | 25628000  |
| XP_01517742.8.1;XP_015177419.1;XP_015177411.1;XP_015177404.1;XP_015177397.1 | XP_015177428.1;XP_015177419.1;XP_015177411.1;XP_015177404.1;XP_015177397.1 | XP_015177428.1 PREDICTED: adenylate kinase isoenzyme 1 [Polistes dominula];XP_015177419.1 PREDICTED: adenylate kinase isoenzyme 1 [Polistes dominula];XP_015177411.1 PREDICTED: adenylate kinase isoenzyme 1 [Polistes dominula];XP_015177404.1 PREDICTED: adeny | 5 | 6 | 6 | 6 | 21,027 | 0         | 51760000  | 81669000 | 0         |
| XP_01517754.5.1;XP_015177544.1                                              | XP_015177545.1;XP_015177544.1                                              | XP_015177545.1 PREDICTED: leukotriene A-4 hydrolase [Polistes dominula];XP_015177544.1 PREDICTED: leukotriene A-4 hydrolase [Polistes dominula]                                                                                                                  | 2 | 6 | 6 | 6 | 70,308 | 0         | 86513000  | 7728100  | 10078000  |
| XP_01517819.3.1                                                             | XP_015178193.1                                                             | XP_015178193.1 PREDICTED: lysosomal alpha-mannosidase [Polistes dominula]                                                                                                                                                                                        | 1 | 6 | 6 | 6 | 194,5  | 0         | 6207800   | 0        | 0         |

|                                                          |                               |                                                                                                                                                                                                                       |   |   |   |   |        |           |           |           |          |
|----------------------------------------------------------|-------------------------------|-----------------------------------------------------------------------------------------------------------------------------------------------------------------------------------------------------------------------|---|---|---|---|--------|-----------|-----------|-----------|----------|
| XP_01517872<br>0.1                                       | XP_015178720.1                | XP_015178720.1 PREDICTED: 3-hydroxyisobutyryl-CoA hydrolase, mitochondrial-like [Polistes dominula]                                                                                                                   | 1 | 6 | 6 | 6 | 47,201 | 51900000  | 5793600   | 0         | 0        |
| XP_01517992<br>6.1                                       | XP_015179926.1                | XP_015179926.1 PREDICTED: elongation factor 1-gamma [Polistes dominula]                                                                                                                                               | 1 | 6 | 6 | 6 | 49,14  | 11969000  | 26022000  | 20424000  | 5496000  |
| XP_01518108<br>5.1;XP_01518<br>1084.1                    | XP_015181085.1;XP_015181084.1 | XP_015181085.1 PREDICTED: hydroxymethylglutaryl-CoA synthase 1 [Polistes dominula];XP_015181084.1 PREDICTED: hydroxymethylglutaryl-CoA synthase 1 [Polistes dominula]                                                 | 2 | 6 | 6 | 6 | 51,505 | 64770000  | 0         | 0         | 0        |
| XP_01518120<br>0.1                                       | XP_015181200.1                | XP_015181200.1 PREDICTED: adenylate kinase [Polistes dominula]                                                                                                                                                        | 1 | 6 | 6 | 6 | 27,929 | 47333000  | 36940000  | 12327000  | 4938900  |
| XP_01518254<br>2.1                                       | XP_015182542.1                | XP_015182542.1 PREDICTED: uncharacterized protein LOC107069607 [Polistes dominula]                                                                                                                                    | 1 | 6 | 6 | 6 | 58,853 | 0         | 88854000  | 20698000  | 0        |
| XP_01518365<br>9.1;XP_01518<br>3658.1                    | XP_015183659.1;XP_015183658.1 | XP_015183659.1 PREDICTED: 6-phosphogluconate dehydrogenase, decarboxylating isoform X2 [Polistes dominula];XP_015183658.1 PREDICTED: 6-phosphogluconate dehydrogenase, decarboxylating isoform X1 [Polistes dominula] | 2 | 6 | 6 | 6 | 53,389 | 63744000  | 0         | 0         | 4174200  |
| XP_01518454<br>9.1                                       | XP_015184549.1                | XP_015184549.1 PREDICTED: peptidyl-prolyl cis-trans isomerase-like [Polistes dominula]                                                                                                                                | 1 | 6 | 6 | 6 | 23,076 | 0         | 0         | 0         | 9631100  |
| XP_01518485<br>0.1                                       | XP_015184850.1                | XP_015184850.1 PREDICTED: selenium-binding protein 1 [Polistes dominula]                                                                                                                                              | 1 | 6 | 6 | 6 | 47,25  | 97554000  | 0         | 0         | 4596500  |
| XP_01518696<br>0.1;XP_01518<br>9987.1;XP_01<br>5189952.1 | XP_015186960.1                | XP_015186960.1 PREDICTED: endochitinase EP3-like [Polistes dominula]                                                                                                                                                  | 3 | 6 | 6 | 6 | 21,112 | 0         | 486750000 | 122140000 | 44652000 |
| XP_01518714<br>7.1;XP_01518<br>7146.1                    | XP_015187147.1;XP_015187146.1 | XP_015187147.1 PREDICTED: endoplasmic reticulum resident protein 29 [Polistes dominula];XP_015187146.1 PREDICTED: endoplasmic reticulum resident protein 29 [Polistes dominula]                                       | 2 | 6 | 6 | 6 | 28,055 | 0         | 3332400   | 6183700   | 0        |
| XP_01518774<br>0.1                                       | XP_015187740.1                | XP_015187740.1 PREDICTED: juvenile hormone epoxide hydrolase 1-like, partial [Polistes dominula]                                                                                                                      | 1 | 6 | 6 | 6 | 54,223 | 85658000  | 0         | 0         | 0        |
| XP_01518886<br>6.1;XP_01518<br>8867.1                    | XP_015188866.1;XP_015188867.1 | XP_015188866.1 PREDICTED: rho GDP-dissociation inhibitor 2 isoform X1 [Polistes dominula];XP_015188867.1 PREDICTED: dynein assembly factor 5, axonemal isoform X2 [Polistes dominula]                                 | 2 | 6 | 6 | 6 | 24,298 | 0         | 317740000 | 0         | 0        |
| XP_01519018<br>3.1                                       | XP_015190183.1                | XP_015190183.1 PREDICTED: peptidyl-prolyl cis-trans isomerase 5 [Polistes dominula]                                                                                                                                   | 1 | 6 | 6 | 6 | 27,415 | 149280000 | 613620000 | 0         | 54851000 |

|                                                                                                                                                                                                                                                                                                                                                                                              |                                                                                                                                                                                                                                                                |                                                                                                                                                                                                                                                                  |    |   |   |   |        |           |           |          |          |
|----------------------------------------------------------------------------------------------------------------------------------------------------------------------------------------------------------------------------------------------------------------------------------------------------------------------------------------------------------------------------------------------|----------------------------------------------------------------------------------------------------------------------------------------------------------------------------------------------------------------------------------------------------------------|------------------------------------------------------------------------------------------------------------------------------------------------------------------------------------------------------------------------------------------------------------------|----|---|---|---|--------|-----------|-----------|----------|----------|
| XP_01519029<br>0.1;XP_01519<br>0292.1;XP_01<br>5190281.1;XP<br>_015190274.1<br>;XP_0151902<br>75.1;XP_0151<br>90276.1;XP_0<br>15190277.1;X<br>P_015190278.<br>1;XP_015190<br>279.1;XP_015<br>190280.1;XP_<br>015190282.1;<br>XP_01519029<br>1.1;XP_01519<br>0283.1;XP_01<br>5190284.1;XP<br>_015190286.1<br>;XP_0151902<br>87.1;XP_0151<br>90288.1;XP_0<br>15190289.1;X<br>P_015190273.<br>1 | XP_015190290.1;XP_015190292.1;XP_015190281.1;XP_015190275.1;XP_015190276.1;XP_015190277.1;XP_015190278.1;XP_015190279.1;XP_015190280.1;XP_015190282.1;XP_015190283.1;XP_015190284.1;XP_015190286.1;XP_015190287.1;XP_015190288.1;XP_015190289.1;XP_015190273.1 | XP_015190290.1 PREDICTED: serine protease inhibitor 3/4-like isoform X17 [Polistes dominula];XP_015190292.1 PREDICTED: serine protease inhibitor 3/4-like isoform X19 [Polistes dominula];XP_015190281.1 PREDICTED: serine protease inhibitor 3/4-like isoform X | 19 | 6 | 6 | 6 | 43,924 | 42241000  | 77614000  | 14591000 | 24512000 |
| XP_01519142<br>9.1                                                                                                                                                                                                                                                                                                                                                                           | XP_015191429.1                                                                                                                                                                                                                                                 | XP_015191429.1 PREDICTED: glucosylceramidase [Polistes dominula]                                                                                                                                                                                                 | 1  | 6 | 6 | 6 | 61,21  | 50921000  | 0         | 0        | 3414900  |
| XP_01519144<br>6.1                                                                                                                                                                                                                                                                                                                                                                           | XP_015191446.1                                                                                                                                                                                                                                                 | XP_015191446.1 PREDICTED: alpha-aminoadipic semialdehyde dehydrogenase [Polistes dominula]                                                                                                                                                                       | 1  | 6 | 6 | 6 | 57,199 | 0         | 4929600   | 4558000  | 0        |
| XP_01517118<br>8.1;XP_01517<br>1189.1                                                                                                                                                                                                                                                                                                                                                        | XP_015171188.1;XP_015171189.1                                                                                                                                                                                                                                  | XP_015171188.1 PREDICTED: pterin-4-alpha-carbinolamine dehydratase isoform X1 [Polistes dominula];XP_015171189.1 PREDICTED: pterin-4-alpha-carbinolamine dehydratase isoform X2 [Polistes dominula]                                                              | 2  | 7 | 7 | 7 | 16,438 | 30289000  | 374050000 | 10037000 | 0        |
| XP_01517349<br>6.1;XP_01517<br>3495.1                                                                                                                                                                                                                                                                                                                                                        | XP_015173496.1;XP_015173495.1                                                                                                                                                                                                                                  | XP_015173496.1 PREDICTED: ribonuclease Oy [Polistes dominula];XP_015173495.1 PREDICTED: ribonuclease Oy [Polistes dominula]                                                                                                                                      | 2  | 7 | 7 | 7 | 29,623 | 97594000  | 3420600   | 2371100  | 18990000 |
| XP_01517571<br>9.1                                                                                                                                                                                                                                                                                                                                                                           | XP_015175719.1                                                                                                                                                                                                                                                 | XP_015175719.1 PREDICTED: phosphoglycerate mutase 2 [Polistes dominula]                                                                                                                                                                                          | 1  | 7 | 7 | 7 | 28,712 | 0         | 159410000 | 0        | 30493000 |
| XP_01517678<br>4.1                                                                                                                                                                                                                                                                                                                                                                           | XP_015176784.1                                                                                                                                                                                                                                                 | XP_015176784.1 PREDICTED: venom carboxylesterase-6-like [Polistes dominula]                                                                                                                                                                                      | 1  | 7 | 7 | 7 | 63,811 | 0         | 16191000  | 98690000 | 0        |
| XP_01517756<br>0.1                                                                                                                                                                                                                                                                                                                                                                           | XP_015177560.1                                                                                                                                                                                                                                                 | XP_015177560.1 PREDICTED: ATP synthase subunit alpha, mitochondrial [Polistes dominula]                                                                                                                                                                          | 1  | 7 | 7 | 7 | 59,518 | 127100000 | 0         | 0        | 0        |
| XP_01517844<br>0.1                                                                                                                                                                                                                                                                                                                                                                           | XP_015178440.1                                                                                                                                                                                                                                                 | XP_015178440.1 PREDICTED: group XV phospholipase A2-like [Polistes dominula]                                                                                                                                                                                     | 1  | 7 | 7 | 7 | 46,645 | 42533000  | 2908000   | 0        | 2242900  |
| XP_01517866<br>5.1;XP_01517<br>8664.1                                                                                                                                                                                                                                                                                                                                                        | XP_015178665.1;XP_015178664.1                                                                                                                                                                                                                                  | XP_015178665.1 PREDICTED: 97 kDa heat shock protein isoform X2 [Polistes dominula];XP_015178664.1 PREDICTED: 97 kDa heat shock protein isoform X1 [Polistes dominula]                                                                                            | 2  | 7 | 7 | 7 | 93,427 | 22816000  | 13319000  | 4898600  | 0        |

|                                                                                                                                                                 |                                                                                                                                                 |                                                                                                                                                                                                                                                                   |   |   |   |   |        |           |           |           |          |
|-----------------------------------------------------------------------------------------------------------------------------------------------------------------|-------------------------------------------------------------------------------------------------------------------------------------------------|-------------------------------------------------------------------------------------------------------------------------------------------------------------------------------------------------------------------------------------------------------------------|---|---|---|---|--------|-----------|-----------|-----------|----------|
| XP_01517884<br>0.1;XP_01517<br>8839.1;XP_01<br>5178838.1;XP<br>_015178835.1<br>;XP_0151788<br>42.1;XP_0151<br>78837.1;XP_0<br>15178836.1;X<br>P_015178843.<br>1 | XP_015178840.1;XP_<br>015178839.1;XP_015<br>178838.1;XP_015178<br>835.1;XP_015178842.<br>1;XP_015178837.1;X<br>P_015178836.1;XP_0<br>15178843.1 | XP_015178840.1 PREDICTED: PDZ and LIM domain protein 3 isoform X6 [Polistes dominula];XP_015178839.1 PREDICTED: PDZ and LIM domain protein 3 isoform X5 [Polistes dominula];XP_015178838.1 PREDICTED: PDZ and LIM domain protein 3 isoform X4 [Polistes dominula] | 8 | 7 | 7 | 7 | 36,262 | 0         | 114230000 | 183620000 | 16177000 |
| XP_01517886<br>2.1;XP_01517<br>8864.1;XP_01<br>5178863.1                                                                                                        | XP_015178862.1;XP_<br>015178864.1;XP_015<br>178863.1                                                                                            | XP_015178862.1 PREDICTED: transketolase-like protein 2 isoform X1 [Polistes dominula];XP_015178864.1 PREDICTED: transketolase-like protein 2 isoform X2 [Polistes dominula];XP_015178863.1 PREDICTED: transketolase-like protein 2 isoform X2 [Polistes dominula] | 3 | 7 | 7 | 7 | 67,984 | 76747000  | 0         | 0         | 0        |
| XP_01517890<br>7.1                                                                                                                                              | XP_015178907.1                                                                                                                                  | XP_015178907.1 PREDICTED: lysosomal aspartic protease [Polistes dominula]                                                                                                                                                                                         | 1 | 7 | 7 | 7 | 42,041 | 35717000  | 0         | 48907000  | 0        |
| XP_01517961<br>5.1                                                                                                                                              | XP_015179615.1                                                                                                                                  | XP_015179615.1 PREDICTED: uncharacterized oxidoreductase Yjmc [Polistes dominula]                                                                                                                                                                                 | 1 | 7 | 7 | 7 | 44,634 | 102600000 | 0         | 0         | 0        |
| XP_01517994<br>1.1                                                                                                                                              | XP_015179941.1                                                                                                                                  | XP_015179941.1 PREDICTED: 4-coumarate--CoA ligase 1 [Polistes dominula]                                                                                                                                                                                           | 1 | 7 | 7 | 7 | 66,64  | 103730000 | 0         | 0         | 0        |
| XP_01518027<br>1.1;XP_01518<br>0270.1;XP_01<br>5180269.1;XP<br>_015180268.1<br>;XP_0151802<br>67.1;XP_0151<br>80266.1;XP_0<br>15180265.1;X<br>P_015180264.<br>1 | XP_015180271.1;XP_<br>015180270.1;XP_015<br>180269.1;XP_015180<br>268.1;XP_015180267.<br>1;XP_015180266.1;X<br>P_015180265.1;XP_0<br>15180264.1 | XP_015180271.1 PREDICTED: muscle M-line assembly protein unc-89 isoform X8 [Polistes dominula];XP_015180270.1 PREDICTED: muscle M-line assembly protein unc-89 isoform X7 [Polistes dominula];XP_015180269.1 PREDICTED: muscle M-line assembly protein unc-89 is  | 8 | 7 | 7 | 7 | 606,68 | 0         | 6682400   | 0         | 15741000 |
| XP_01518064<br>6.1                                                                                                                                              | XP_015180646.1                                                                                                                                  | XP_015180646.1 PREDICTED: glycogen phosphorylase [Polistes dominula]                                                                                                                                                                                              | 1 | 7 | 7 | 7 | 97,461 | 0         | 0         | 0         | 84646000 |
| XP_01518093<br>4.1;XP_01518<br>0933.1;XP_01<br>5180932.1                                                                                                        | XP_015180934.1;XP_<br>015180933.1;XP_015<br>180932.1                                                                                            | XP_015180934.1 PREDICTED: NADP-dependent malic enzyme isoform X2 [Polistes dominula];XP_015180933.1 PREDICTED: NADP-dependent malic enzyme isoform X1 [Polistes dominula];XP_015180932.1 PREDICTED: NADP-dependent malic enzyme isoform X1 [Polistes dominula]    | 3 | 7 | 7 | 7 | 68,391 | 0         | 0         | 5764100   | 60683000 |
| XP_01518131<br>5.1                                                                                                                                              | XP_015181315.1                                                                                                                                  | XP_015181315.1 PREDICTED: uncharacterized protein LOC107068952 [Polistes dominula]                                                                                                                                                                                | 1 | 7 | 7 | 7 | 19,253 | 839040000 | 23077000  | 47906000  | 84305000 |
| XP_01518140<br>6.1                                                                                                                                              | XP_015181406.1                                                                                                                                  | XP_015181406.1 PREDICTED: peptidyl-prolyl cis-trans isomerase [Polistes dominula]                                                                                                                                                                                 | 1 | 7 | 7 | 7 | 18,063 | 33094000  | 52859000  | 8978700   | 47713000 |

|                                                                                                                                                                 |                                                                                                                                                 |                                                                                                                                                                                                                                                                                                                                                                                                                                                                                                                                                             |   |   |   |   |        |           |           |           |           |
|-----------------------------------------------------------------------------------------------------------------------------------------------------------------|-------------------------------------------------------------------------------------------------------------------------------------------------|-------------------------------------------------------------------------------------------------------------------------------------------------------------------------------------------------------------------------------------------------------------------------------------------------------------------------------------------------------------------------------------------------------------------------------------------------------------------------------------------------------------------------------------------------------------|---|---|---|---|--------|-----------|-----------|-----------|-----------|
| XP_01518158<br>4.1;XP_01518<br>1583.1;XP_01<br>5181582.1;XP<br>_015181581.1<br>;XP_0151815<br>80.1;XP_0151<br>81579.1;XP_0<br>15181578.1;X<br>P_015181576.<br>1 | XP_015181584.1;XP_<br>015181583.1;XP_015<br>181582.1;XP_015181<br>581.1;XP_015181580.<br>1;XP_015181579.1;X<br>P_015181578.1;XP_0<br>15181576.1 | XP_015181584.1 PREDICTED: alpha-N-acetyl-galactosaminidase isoform X2 [Polistes dominula];XP_015181583.1 PREDICTED: alpha-N-acetyl-galactosaminidase isoform X2 [Polistes dominula];XP_015181582.1 PREDICTED: alpha-N-acetyl-galactosaminidase isoform X2 [Polistes dominula];XP_015181579.1 PREDICTED: alpha-N-acetyl-galactosaminidase isoform X2 [Polistes dominula];XP_015181578.1 PREDICTED: alpha-N-acetyl-galactosaminidase isoform X2 [Polistes dominula];XP_015181576.1 PREDICTED: alpha-N-acetyl-galactosaminidase isoform X2 [Polistes dominula] | 8 | 7 | 7 | 7 | 50,344 | 0         | 32199000  | 0         | 54354000  |
| XP_01518252<br>8.1                                                                                                                                              | XP_015182528.1                                                                                                                                  | XP_015182528.1 PREDICTED: nuclear migration protein nudC [Polistes dominula]                                                                                                                                                                                                                                                                                                                                                                                                                                                                                | 1 | 7 | 7 | 7 | 38,593 | 0         | 86404000  | 0         | 0         |
| XP_01518285<br>2.1;XP_01518<br>2851.1;XP_01<br>5182850.1                                                                                                        | XP_015182852.1;XP_<br>015182851.1;XP_015<br>182850.1                                                                                            | XP_015182852.1 PREDICTED: digestive cysteine proteinase 1 [Polistes dominula];XP_015182851.1 PREDICTED: digestive cysteine proteinase 1 [Polistes dominula];XP_015182850.1 PREDICTED: digestive cysteine proteinase 1 [Polistes dominula]                                                                                                                                                                                                                                                                                                                   | 3 | 7 | 7 | 7 | 62,048 | 49251000  | 34157000  | 20767000  | 0         |
| XP_01518411<br>0.1                                                                                                                                              | XP_015184110.1                                                                                                                                  | XP_015184110.1 PREDICTED: rab GDP dissociation inhibitor beta [Polistes dominula]                                                                                                                                                                                                                                                                                                                                                                                                                                                                           | 1 | 7 | 7 | 7 | 50,023 | 0         | 87013000  | 0         | 0         |
| XP_01518467<br>1.1;XP_01518<br>4669.1;XP_01<br>5184668.1                                                                                                        | XP_015184671.1;XP_<br>015184669.1;XP_015<br>184668.1                                                                                            | XP_015184671.1 PREDICTED: trehalase-like isoform X2 [Polistes dominula];XP_015184669.1 PREDICTED: trehalase-like isoform X1 [Polistes dominula];XP_015184668.1 PREDICTED: trehalase-like isoform X1 [Polistes dominula]                                                                                                                                                                                                                                                                                                                                     | 3 | 7 | 7 | 7 | 68,068 | 25180000  | 49119000  | 0         | 8939100   |
| XP_01518711<br>6.1                                                                                                                                              | XP_015187116.1                                                                                                                                  | XP_015187116.1 PREDICTED: phospholipase A1-like [Polistes dominula]                                                                                                                                                                                                                                                                                                                                                                                                                                                                                         | 1 | 8 | 7 | 7 | 37,852 | 403260000 | 0         | 131100000 | 170700000 |
| XP_01518779<br>5.1;XP_01518<br>7794.1;XP_01<br>5187793.1;XP<br>_015187796.1                                                                                     | XP_015187795.1;XP_<br>015187794.1;XP_015<br>187793.1;XP_015187<br>796.1                                                                         | XP_015187795.1 PREDICTED: glucose-6-phosphate 1-dehydrogenase isoform X3 [Polistes dominula];XP_015187794.1 PREDICTED: glucose-6-phosphate 1-dehydrogenase isoform X2 [Polistes dominula];XP_015187793.1 PREDICTED: glucose-6-phosphate 1-dehydrogenase isoform                                                                                                                                                                                                                                                                                             | 4 | 7 | 7 | 7 | 60,237 | 44026000  | 0         | 0         | 0         |
| XP_01518937<br>6.1                                                                                                                                              | XP_015189376.1                                                                                                                                  | XP_015189376.1 PREDICTED: eukaryotic translation initiation factor 2A [Polistes dominula]                                                                                                                                                                                                                                                                                                                                                                                                                                                                   | 1 | 7 | 7 | 7 | 68,431 | 0         | 31750000  | 0         | 0         |
| XP_01519012<br>4.1;XP_01519<br>0123.1                                                                                                                           | XP_015190124.1;XP_<br>015190123.1                                                                                                               | XP_015190124.1 PREDICTED: probable phospholipid hydroperoxide glutathione peroxidase isoform X2 [Polistes dominula];XP_015190123.1 PREDICTED: probable phospholipid hydroperoxide glutathione peroxidase isoform X1 [Polistes dominula]                                                                                                                                                                                                                                                                                                                     | 2 | 7 | 7 | 7 | 21,926 | 19199000  | 142560000 | 99320000  | 9543200   |
| XP_01519128<br>4.1                                                                                                                                              | XP_015191284.1                                                                                                                                  | XP_015191284.1 PREDICTED: GTP:AMP phosphotransferase AK3, mitochondrial [Polistes dominula]                                                                                                                                                                                                                                                                                                                                                                                                                                                                 | 1 | 7 | 7 | 7 | 24,975 | 341620000 | 0         | 0         | 0         |
| XP_01519146<br>8.1                                                                                                                                              | XP_015191468.1                                                                                                                                  | XP_015191468.1 PREDICTED: peroxisomal multifunctional enzyme type 2-like [Polistes dominula]                                                                                                                                                                                                                                                                                                                                                                                                                                                                | 1 | 7 | 7 | 7 | 79,329 | 32832000  | 0         | 0         | 2223300   |
| XP_01519165<br>2.1;XP_01519<br>1651.1;XP_01<br>5191650.1;XP<br>_015191649.1                                                                                     | XP_015191652.1;XP_<br>015191651.1;XP_015<br>191650.1;XP_015191<br>649.1                                                                         | XP_015191652.1 PREDICTED: uncharacterized protein LOC107074598 isoform X3 [Polistes dominula];XP_015191651.1 PREDICTED: uncharacterized protein LOC107074598 isoform X3 [Polistes dominula];XP_015191650.1 PREDICTED: uncharacterized protein LOC107074598 isofo                                                                                                                                                                                                                                                                                            | 4 | 7 | 7 | 7 | 46,925 | 0         | 72135000  | 0         | 5230000   |
| XP_01517388<br>9.1                                                                                                                                              | XP_015173889.1                                                                                                                                  | XP_015173889.1 PREDICTED: peroxisomal hydratase-dehydrogenase-epimerase-like [Polistes dominula]                                                                                                                                                                                                                                                                                                                                                                                                                                                            | 1 | 8 | 8 | 8 | 94,529 | 9901500   | 104830000 | 70677000  | 32068000  |

|                                                                                                                                          |                                                                                                                              |                                                                                                                                                                                                                                                                  |   |   |   |   |        |           |           |            |          |
|------------------------------------------------------------------------------------------------------------------------------------------|------------------------------------------------------------------------------------------------------------------------------|------------------------------------------------------------------------------------------------------------------------------------------------------------------------------------------------------------------------------------------------------------------|---|---|---|---|--------|-----------|-----------|------------|----------|
| XP_01517646<br>6.1;XP_01517<br>6485.1;XP_01<br>5176476.1;XP<br>_015176502.1<br>;XP_0151764<br>94.1                                       | XP_015176466.1;XP_<br>015176485.1;XP_015<br>176476.1;XP_015176<br>502.1;XP_015176494.<br>1                                   | XP_015176466.1 PREDICTED: muscle LIM protein Mlp84B-like isoform X1 [Polistes dominula];XP_015176485.1 PREDICTED: muscle LIM protein 1-like isoform X3 [Polistes dominula];XP_015176476.1 PREDICTED: muscle LIM protein Mlp84B-like isoform X2 [Polistes dominul | 5 | 8 | 8 | 8 | 53,388 | 0         | 694730000 | 3527600000 | 37654000 |
| XP_01517663<br>8.1;XP_01517<br>6637.1;XP_01<br>5176636.1;XP<br>_015176634.1                                                              | XP_015176638.1;XP_<br>015176637.1;XP_015<br>176636.1;XP_015176<br>634.1                                                      | XP_015176638.1 PREDICTED: hexokinase type 2 isoform X4 [Polistes dominula];XP_015176637.1 PREDICTED: hexokinase type 2 isoform X3 [Polistes dominula];XP_015176636.1 PREDICTED: hexokinase type 2 isoform X2 [Polistes dominula];XP_015176634.1 PREDICTED: hexok | 4 | 8 | 8 | 8 | 49,86  | 0         | 33111000  | 0          | 0        |
| XP_01517863<br>2.1;XP_01517<br>8631.1;XP_01<br>5178630.1;XP<br>_015178628.1<br>;XP_0151786<br>29.1                                       | XP_015178632.1;XP_<br>015178631.1;XP_015<br>178630.1;XP_015178<br>628.1;XP_015178629.<br>1                                   | XP_015178632.1 PREDICTED: microtubule-associated protein tau-like isoform X5 [Polistes dominula];XP_015178631.1 PREDICTED: microtubule-associated protein 4-like isoform X4 [Polistes dominula];XP_015178630.1 PREDICTED: microtubule-associated protein 4-like  | 5 | 8 | 8 | 8 | 125,78 | 8435800   | 16897000  | 4666000    | 2057800  |
| XP_01518162<br>3.1;XP_01518<br>1629.1;XP_01<br>5181628.1;XP<br>_015181627.1<br>;XP_0151816<br>26.1;XP_0151<br>81625.1;XP_0<br>15181624.1 | XP_015181623.1;XP_<br>015181629.1;XP_015<br>181628.1;XP_015181<br>627.1;XP_015181626.<br>1;XP_015181625.1;X<br>P_015181624.1 | XP_015181623.1 PREDICTED: moesin/ezrin/radixin homolog 1 isoform X1 [Polistes dominula];XP_015181629.1 PREDICTED: moesin/ezrin/radixin homolog 1 isoform X7 [Polistes dominula];XP_015181628.1 PREDICTED: moesin/ezrin/radixin homolog 1 isoform X6 [Polistes do | 7 | 8 | 8 | 8 | 60,225 | 38699000  | 28268000  | 0          | 5872500  |
| XP_01518340<br>6.1;XP_01518<br>3405.1;XP_01<br>5183404.1;XP<br>_015183403.1<br>;XP_0151834<br>02.1;XP_0151<br>83401.1                    | XP_015183406.1;XP_<br>015183405.1;XP_015<br>183404.1;XP_015183<br>403.1;XP_015183402.<br>1;XP_015183401.1                    | XP_015183406.1 PREDICTED: adenyl cyclase-associated protein 1 isoform X4 [Polistes dominula];XP_015183405.1 PREDICTED: adenyl cyclase-associated protein 1 isoform X3 [Polistes dominula];XP_015183404.1 PREDICTED: adenyl cyclase-associated protein 1 is       | 6 | 8 | 8 | 8 | 56,943 | 6878000   | 546000000 | 52958000   | 16682000 |
| XP_01518366<br>3.1                                                                                                                       | XP_015183663.1                                                                                                               | XP_015183663.1 PREDICTED: probable citrate synthase 2, mitochondrial [Polistes dominula]                                                                                                                                                                         | 1 | 8 | 8 | 8 | 51,836 | 66668000  | 121440000 | 15871000   | 90552000 |
| XP_01518388<br>2.1                                                                                                                       | XP_015183882.1                                                                                                               | XP_015183882.1 PREDICTED: glutathione S-transferase 1-1-like [Polistes dominula]                                                                                                                                                                                 | 1 | 8 | 8 | 8 | 25,034 | 124830000 | 622670000 | 91801000   | 57415000 |
| XP_01518456<br>1.1                                                                                                                       | XP_015184561.1                                                                                                               | XP_015184561.1 PREDICTED: obg-like ATPase 1 [Polistes dominula]                                                                                                                                                                                                  | 1 | 8 | 8 | 8 | 44,661 | 0         | 67117000  | 8257100    | 0        |
| XP_01518608<br>9.1;XP_01518<br>6079.1                                                                                                    | XP_015186089.1;XP_<br>015186079.1                                                                                            | XP_015186089.1 PREDICTED: prosaposin isoform X2 [Polistes dominula];XP_015186079.1 PREDICTED: prosaposin isoform X1 [Polistes dominula]                                                                                                                          | 2 | 8 | 8 | 8 | 83,057 | 113850000 | 0         | 0          | 0        |
| XP_01518652<br>1.1                                                                                                                       | XP_015186521.1                                                                                                               | XP_015186521.1 PREDICTED: beta-1,3-glucan-binding protein 1-like [Polistes dominula]                                                                                                                                                                             | 1 | 8 | 8 | 8 | 53,483 | 0         | 102270000 | 23391000   | 0        |

|                                                                                                                                                 |                                                                                |                                                                                                                                                                                                                                                                                 |   |   |   |   |        |           |            |           |           |
|-------------------------------------------------------------------------------------------------------------------------------------------------|--------------------------------------------------------------------------------|---------------------------------------------------------------------------------------------------------------------------------------------------------------------------------------------------------------------------------------------------------------------------------|---|---|---|---|--------|-----------|------------|-----------|-----------|
| XP_01518711<br>3.1                                                                                                                              | XP_015187113.1                                                                 | XP_015187113.1 PREDICTED: protein yellow-like [Polistes dominula]                                                                                                                                                                                                               | 1 | 8 | 8 | 8 | 49,146 | 102730000 | 0          | 0         | 7357400   |
| XP_01517280<br>6.1;XP_01517<br>2805.1                                                                                                           | XP_015172806.1;XP_<br>015172805.1                                              | XP_015172806.1 PREDICTED: cytochrome c [Polistes dominula];XP_015172805.1 PREDICTED: cytochrome c [Polistes dominula]                                                                                                                                                           | 2 | 9 | 9 | 9 | 11,836 | 60748000  | 2421300000 | 931830000 | 215220000 |
| XP_01517468<br>1.1                                                                                                                              | XP_015174681.1                                                                 | XP_015174681.1 PREDICTED: cytosol aminopeptidase isoform X2 [Polistes dominula]                                                                                                                                                                                                 | 1 | 9 | 9 | 9 | 55,246 | 31114000  | 323600000  | 0         | 8097100   |
| XP_01517495<br>1.1                                                                                                                              | XP_015174951.1                                                                 | XP_015174951.1 PREDICTED: triosephosphate isomerase [Polistes dominula]                                                                                                                                                                                                         | 1 | 9 | 9 | 9 | 26,906 | 33044000  | 77039000   | 0         | 279820000 |
| XP_01517684<br>1.1                                                                                                                              | XP_015176841.1                                                                 | XP_015176841.1 PREDICTED: superoxide dismutase [Mn], mitochondrial [Polistes dominula]                                                                                                                                                                                          | 1 | 9 | 9 | 9 | 24,402 | 105580000 | 429930000  | 34971000  | 11758000  |
| XP_01517784<br>8.1;XP_01518<br>2320.1;XP_01<br>5182319.1;AC<br>B70872.1;AJ<br>G01714.1;AH<br>M24890.1;XP<br>_015172041.1<br>;XP_0151720<br>32.1 | XP_015177848.1;XP_<br>015182320.1;XP_015<br>182319.1;ACB70872.<br>1;AJG01714.1 | XP_015177848.1 PREDICTED: elongation factor 1-alpha [Polistes dominula];XP_015182320.1 PREDICTED: elongation factor 1-alpha-like [Polistes dominula];XP_015182319.1 PREDICTED: elongation factor 1-alpha-like [Polistes dominula];ACB70872.1 elongation factor 1                | 8 | 9 | 9 | 9 | 50,304 | 160930000 | 83782000   | 62021000  | 56640000  |
| XP_01517865<br>1.1                                                                                                                              | XP_015178651.1                                                                 | XP_015178651.1 PREDICTED: protein disulfide-isomerase [Polistes dominula]                                                                                                                                                                                                       | 1 | 9 | 9 | 9 | 56,624 | 74322000  | 6698000    | 0         | 0         |
| XP_01517947<br>3.1;XP_01517<br>9472.1;XP_01<br>5179471.1;XP<br>_015179470.1                                                                     | XP_015179473.1;XP_<br>015179472.1;XP_015<br>179471.1;XP_015179<br>470.1        | XP_015179473.1 PREDICTED: aldose reductase-like [Polistes dominula];XP_015179472.1 PREDICTED: aldose reductase-like [Polistes dominula];XP_015179471.1 PREDICTED: aldose reductase-like [Polistes dominula];XP_015179470.1 PREDICTED: aldose reductase-like [Polistes dominula] | 4 | 9 | 9 | 9 | 36,409 | 11943000  | 87367000   | 34347000  | 16542000  |
| XP_01517948<br>4.1                                                                                                                              | XP_015179484.1                                                                 | XP_015179484.1 PREDICTED: probable fatty acid-binding protein isoform X2 [Polistes dominula]                                                                                                                                                                                    | 1 | 9 | 9 | 2 | 15,098 | 0         | 301910000  | 124450000 | 14177000  |
| XP_01518040<br>0.1                                                                                                                              | XP_015180400.1                                                                 | XP_015180400.1 PREDICTED: translation elongation factor 2 [Polistes dominula]                                                                                                                                                                                                   | 1 | 9 | 9 | 9 | 94,719 | 21210000  | 13922000   | 0         | 8524100   |
| XP_01518478<br>3.1                                                                                                                              | XP_015184783.1                                                                 | XP_015184783.1 PREDICTED: heat shock protein 83 [Polistes dominula]                                                                                                                                                                                                             | 1 | 9 | 9 | 5 | 82,764 | 101400000 | 0          | 0         | 0         |
| XP_01518519<br>2.1;XP_01518<br>5191.1;XP_01<br>5185190.1                                                                                        | XP_015185192.1;XP_<br>015185191.1;XP_015<br>185190.1                           | XP_015185192.1 PREDICTED: puromycin-sensitive aminopeptidase isoform X3 [Polistes dominula];XP_015185191.1 PREDICTED: puromycin-sensitive aminopeptidase isoform X2 [Polistes dominula];XP_015185190.1 PREDICTED: puromycin-sensitive aminopeptidase isoform X1                 | 3 | 9 | 9 | 9 | 104,4  | 0         | 157670000  | 0         | 2685800   |
| XP_01518624<br>3.1                                                                                                                              | XP_015186243.1                                                                 | XP_015186243.1 PREDICTED: protein deglycase DJ-1zDJ-1-like [Polistes dominula]                                                                                                                                                                                                  | 1 | 9 | 9 | 9 | 23,779 | 47057000  | 667040000  | 82916000  | 31930000  |
| XP_01518999<br>1.1                                                                                                                              | XP_015189991.1                                                                 | XP_015189991.1 PREDICTED: protein disulfide-isomerase A3 [Polistes dominula]                                                                                                                                                                                                    | 1 | 9 | 9 | 9 | 55,645 | 0         | 54288000   | 11988000  | 0         |
| XP_01519004<br>5.1                                                                                                                              | XP_015190045.1                                                                 | XP_015190045.1 PREDICTED: glyoxalase domain-containing protein 4 [Polistes dominula]                                                                                                                                                                                            | 1 | 9 | 9 | 9 | 32,149 | 127940000 | 369220000  | 0         | 44635000  |

|                                                                                                                                                                                                                  |                                                                                           |                                                                                                                                                                                                                                                                                                                                                                                                                                                                                                                                                                                                                                                                                                                                                                              |    |    |    |    |        |           |            |            |           |
|------------------------------------------------------------------------------------------------------------------------------------------------------------------------------------------------------------------|-------------------------------------------------------------------------------------------|------------------------------------------------------------------------------------------------------------------------------------------------------------------------------------------------------------------------------------------------------------------------------------------------------------------------------------------------------------------------------------------------------------------------------------------------------------------------------------------------------------------------------------------------------------------------------------------------------------------------------------------------------------------------------------------------------------------------------------------------------------------------------|----|----|----|----|--------|-----------|------------|------------|-----------|
| XP_01519117.1;XP_015191178.1                                                                                                                                                                                     | XP_015191177.1;XP_015191178.1                                                             | XP_015191177.1 PREDICTED: dihydropteridine reductase isoform X1 [Polistes dominula];XP_015191178.1 PREDICTED: dihydropteridine reductase isoform X2 [Polistes dominula]                                                                                                                                                                                                                                                                                                                                                                                                                                                                                                                                                                                                      | 2  | 9  | 9  | 9  | 25,677 | 92257000  | 73082000   | 41683000   | 10907000  |
| XP_01517166.1;XP_015171663.1;XP_015171662.1;XP_015171661.1                                                                                                                                                       | XP_015171664.1;XP_015171663.1;XP_015171662.1;XP_015171661.1                               | XP_015171664.1 PREDICTED: dipeptidyl peptidase 3 isoform X3 [Polistes dominula];XP_015171663.1 PREDICTED: dipeptidyl peptidase 3 isoform X3 [Polistes dominula];XP_015171662.1 PREDICTED: dipeptidyl peptidase 3 isoform X2 [Polistes dominula];XP_015171661.1 P                                                                                                                                                                                                                                                                                                                                                                                                                                                                                                             | 4  | 10 | 10 | 10 | 83,652 | 0         | 129660000  | 0          | 0         |
| XP_01517167.1                                                                                                                                                                                                    | XP_015171673.1                                                                            | XP_015171673.1 PREDICTED: isocitrate dehydrogenase [NADP] cytoplasmic [Polistes dominula]                                                                                                                                                                                                                                                                                                                                                                                                                                                                                                                                                                                                                                                                                    | 1  | 10 | 10 | 10 | 53,08  | 273410000 | 0          | 0          | 28376000  |
| XP_01517184.1;XP_015171838.1                                                                                                                                                                                     | XP_015171840.1;XP_015171838.1                                                             | XP_015171840.1 PREDICTED: prolyl endopeptidase isoform X2 [Polistes dominula];XP_015171838.1 PREDICTED: prolyl endopeptidase isoform X1 [Polistes dominula]                                                                                                                                                                                                                                                                                                                                                                                                                                                                                                                                                                                                                  | 2  | 10 | 10 | 10 | 79,632 | 2363800   | 577890000  | 13019000   | 0         |
| XP_01517630.1                                                                                                                                                                                                    | XP_015176309.1                                                                            | XP_015176309.1 PREDICTED: vitellogenin-6-like [Polistes dominula]                                                                                                                                                                                                                                                                                                                                                                                                                                                                                                                                                                                                                                                                                                            | 1  | 10 | 10 | 10 | 171,21 | 0         | 16406000   | 7826700    | 24137000  |
| XP_01517834.1;XP_015178343.1;XP_015178341.1;XP_015178341.1;XP_015178339.1;XP_015178339.1;XP_015178335.1;XP_015178347.1;XP_015178335.1;XP_015178347.1;XP_015178340.1;XP_015178340.1;XP_015178336.1;XP_015178338.1 | XP_015178346.1;XP_015178343.1;XP_015178341.1;XP_015178335.1;XP_015178347.1;XP_015178344.1 | XP_015178346.1 PREDICTED: troponin I isoform X10 [Polistes dominula];XP_015178343.1 PREDICTED: troponin I isoform X8 [Polistes dominula];XP_015178341.1 PREDICTED: troponin I isoform X5 [Polistes dominula];XP_015178339.1 PREDICTED: troponin I isoform X5 [Polistes dominula];XP_015178335.1 PREDICTED: troponin I isoform X5 [Polistes dominula];XP_015178347.1 PREDICTED: troponin I isoform X5 [Polistes dominula];XP_015178344.1 PREDICTED: troponin I isoform X5 [Polistes dominula];XP_015178340.1 PREDICTED: troponin I isoform X5 [Polistes dominula];XP_015178340.1 PREDICTED: troponin I isoform X5 [Polistes dominula];XP_015178336.1 PREDICTED: troponin I isoform X5 [Polistes dominula];XP_015178338.1 PREDICTED: troponin I isoform X5 [Polistes dominula] | 10 | 10 | 10 | 8  | 23,745 | 0         | 14456000   | 1201400000 | 0         |
| XP_01517874.1                                                                                                                                                                                                    | XP_015178742.1                                                                            | XP_015178742.1 PREDICTED: uncharacterized protein LOC107067603 [Polistes dominula]                                                                                                                                                                                                                                                                                                                                                                                                                                                                                                                                                                                                                                                                                           | 1  | 10 | 10 | 10 | 225,64 | 0         | 201110000  | 433940000  | 28595000  |
| XP_01517926.1;XP_015179269.1                                                                                                                                                                                     | XP_015179268.1;XP_015179269.1                                                             | XP_015179268.1 PREDICTED: heat shock 70 kDa protein cognate 3 isoform X1 [Polistes dominula];XP_015179269.1 PREDICTED: heat shock 70 kDa protein cognate 3 isoform X2 [Polistes dominula]                                                                                                                                                                                                                                                                                                                                                                                                                                                                                                                                                                                    | 2  | 13 | 10 | 10 | 73,121 | 100750000 | 4670500    | 0          | 0         |
| XP_01518207.1                                                                                                                                                                                                    | XP_015182073.1                                                                            | XP_015182073.1 PREDICTED: uncharacterized protein LOC107069346 [Polistes dominula]                                                                                                                                                                                                                                                                                                                                                                                                                                                                                                                                                                                                                                                                                           | 1  | 10 | 10 | 10 | 127,62 | 14907000  | 851040000  | 245650000  | 615190000 |
| XP_01518384.1                                                                                                                                                                                                    | XP_015183846.1                                                                            | XP_015183846.1 PREDICTED: glutathione S-transferase-like [Polistes dominula]                                                                                                                                                                                                                                                                                                                                                                                                                                                                                                                                                                                                                                                                                                 | 1  | 10 | 10 | 7  | 23,245 | 163610000 | 2662400000 | 337020000  | 135570000 |
| XP_01518435.1                                                                                                                                                                                                    | XP_015184358.1                                                                            | XP_015184358.1 PREDICTED: 3-ketoacyl-CoA thiolase, mitochondrial [Polistes dominula]                                                                                                                                                                                                                                                                                                                                                                                                                                                                                                                                                                                                                                                                                         | 1  | 10 | 10 | 10 | 42,023 | 0         | 87842000   | 0          | 0         |
| XP_01518620.1                                                                                                                                                                                                    | XP_015186207.1                                                                            | XP_015186207.1 PREDICTED: aminoacylase-1-like [Polistes dominula]                                                                                                                                                                                                                                                                                                                                                                                                                                                                                                                                                                                                                                                                                                            | 1  | 10 | 10 | 10 | 45,722 | 0         | 161680000  | 47702000   | 25977000  |
| XP_01518712.1                                                                                                                                                                                                    | XP_015187127.1                                                                            | XP_015187127.1 PREDICTED: uncharacterized protein LOC107072057 [Polistes dominula]                                                                                                                                                                                                                                                                                                                                                                                                                                                                                                                                                                                                                                                                                           | 1  | 10 | 10 | 10 | 21,751 | 6476900   | 226280000  | 15615000   | 2716500   |
| XP_01517307.1                                                                                                                                                                                                    | XP_015173078.1                                                                            | XP_015173078.1 PREDICTED: protein lethal(2)essential for life-like [Polistes dominula]                                                                                                                                                                                                                                                                                                                                                                                                                                                                                                                                                                                                                                                                                       | 1  | 11 | 11 | 11 | 23,619 | 283690000 | 0          | 7574000    | 0         |

|                                                          |                                                      |                                                                                                                                                                                                                                               |   |    |    |    |        |            |            |           |           |
|----------------------------------------------------------|------------------------------------------------------|-----------------------------------------------------------------------------------------------------------------------------------------------------------------------------------------------------------------------------------------------|---|----|----|----|--------|------------|------------|-----------|-----------|
| XP_01517567<br>1.1;XP_01517<br>5670.1                    | XP_015175671.1;XP_<br>015175670.1                    | XP_015175671.1 PREDICTED: V-type proton ATPase subunit C [Polistes dominula];XP_015175670.1 PREDICTED: V-type proton ATPase subunit C [Polistes dominula]                                                                                     | 2 | 11 | 11 | 11 | 44,406 | 34948000   | 79929000   | 11075000  | 0         |
| XP_01517690<br>6.1;XP_01517<br>6908.1;XP_01<br>5176907.1 | XP_015176906.1;XP_<br>015176908.1;XP_015<br>176907.1 | XP_015176906.1 PREDICTED: esterase E4-like [Polistes dominula];XP_015176908.1 PREDICTED: esterase FE4-like isoform X2 [Polistes dominula];XP_015176907.1 PREDICTED: esterase E4-like isoform X1 [Polistes dominula]                           | 3 | 12 | 11 | 11 | 65,506 | 0          | 358680000  | 0         | 0         |
| XP_01517825<br>2.1                                       | XP_015178252.1                                       | XP_015178252.1 PREDICTED: insulin-like growth factor-binding protein complex acid labile subunit [Polistes dominula]                                                                                                                          | 1 | 11 | 11 | 11 | 71,434 | 0          | 243540000  | 14333000  | 0         |
| XP_01517890<br>6.1                                       | XP_015178906.1                                       | XP_015178906.1 PREDICTED: delta-1-pyrroline-5-carboxylate dehydrogenase, mitochondrial [Polistes dominula]                                                                                                                                    | 1 | 11 | 11 | 11 | 63,139 | 121820000  | 110850000  | 41089000  | 0         |
| XP_01518530<br>3.1                                       | XP_015185303.1                                       | XP_015185303.1 PREDICTED: vascular endothelial growth factor C [Polistes dominula]                                                                                                                                                            | 1 | 11 | 11 | 11 | 36,254 | 791920000  | 198370000  | 41545000  | 373830000 |
| XP_01518653<br>7.1                                       | XP_015186537.1                                       | XP_015186537.1 PREDICTED: nucleoside diphosphate kinase [Polistes dominula]                                                                                                                                                                   | 1 | 11 | 11 | 11 | 19,679 | 82621000   | 3399600000 | 434920000 | 147860000 |
| XP_01518708<br>8.1;XP_01518<br>7087.1                    | XP_015187088.1;XP_<br>015187087.1                    | XP_015187088.1 PREDICTED: 3-hydroxyacyl-CoA dehydrogenase type-2-like [Polistes dominula];XP_015187087.1 PREDICTED: 3-hydroxyacyl-CoA dehydrogenase type-2-like [Polistes dominula]                                                           | 2 | 11 | 11 | 9  | 27,117 | 114080000  | 244080000  | 20517000  | 55781000  |
| XP_01519004<br>4.1                                       | XP_015190044.1                                       | XP_015190044.1 PREDICTED: protein lethal(2)essential for life-like [Polistes dominula]                                                                                                                                                        | 1 | 11 | 11 | 11 | 27,592 | 2568900000 | 229410000  | 105420000 | 160290000 |
| XP_01517180<br>6.1;XP_01517<br>1805.1                    | XP_015171806.1;XP_<br>015171805.1                    | XP_015171806.1 PREDICTED: glycerol-3-phosphate dehydrogenase [NAD(+)], cytoplasmic-like isoform X2 [Polistes dominula];XP_015171805.1 PREDICTED: glycerol-3-phosphate dehydrogenase [NAD(+)], cytoplasmic-like isoform X1 [Polistes dominula] | 2 | 12 | 12 | 12 | 38,313 | 5546100    | 149810000  | 6163100   | 137990000 |
| XP_01517236<br>7.1                                       | XP_015172367.1                                       | XP_015172367.1 PREDICTED: malate dehydrogenase, cytoplasmic [Polistes dominula]                                                                                                                                                               | 1 | 12 | 12 | 12 | 36,25  | 90010000   | 1390000000 | 353500000 | 87286000  |
| XP_01517303<br>0.1                                       | XP_015173030.1                                       | XP_015173030.1 PREDICTED: acetyl-CoA acetyltransferase, cytosolic [Polistes dominula]                                                                                                                                                         | 1 | 12 | 12 | 12 | 41,548 | 272310000  | 0          | 0         | 0         |
| XP_01517697<br>5.1                                       | XP_015176975.1                                       | XP_015176975.1 PREDICTED: ATP synthase subunit beta, mitochondrial [Polistes dominula]                                                                                                                                                        | 1 | 12 | 12 | 12 | 55,223 | 143480000  | 0          | 0         | 0         |
| XP_01517740<br>1.1                                       | XP_015177401.1                                       | XP_015177401.1 PREDICTED: chitinase-like protein Idgf4 [Polistes dominula]                                                                                                                                                                    | 1 | 12 | 12 | 12 | 48,457 | 5640100    | 620140000  | 323360000 | 12994000  |
| XP_01517914<br>2.1;XP_01517<br>9141.1;XP_01<br>5179139.1 | XP_015179142.1;XP_<br>015179141.1;XP_015<br>179139.1 | XP_015179142.1 PREDICTED: actin, muscle [Polistes dominula];XP_015179141.1 PREDICTED: actin, clone 205-like [Polistes dominula];XP_015179139.1 PREDICTED: actin, clone 205-like [Polistes dominula]                                           | 3 | 12 | 12 | 4  | 41,757 | 304930000  | 344480000  | 69163000  | 8611900   |
| XP_01518458<br>1.1                                       | XP_015184581.1                                       | XP_015184581.1 PREDICTED: catalase [Polistes dominula]                                                                                                                                                                                        | 1 | 12 | 12 | 12 | 57,659 | 0          | 93272000   | 0         | 0         |
| XP_01518828<br>8.1                                       | XP_015188288.1                                       | XP_015188288.1 PREDICTED: peroxiredoxin 1-like [Polistes dominula]                                                                                                                                                                            | 1 | 12 | 12 | 11 | 21,569 | 696240000  | 142310000  | 630590000 | 154700000 |
| XP_01517847<br>8.1                                       | XP_015178478.1                                       | XP_015178478.1 PREDICTED: glyceraldehyde-3-phosphate dehydrogenase 2 [Polistes dominula]                                                                                                                                                      | 1 | 13 | 13 | 13 | 35,655 | 99767000   | 78163000   | 35786000  | 246550000 |

|                                                                                                                                                                 |                                                                                                          |                                                                                                                                                                                                                                                                  |   |    |    |    |        |             |            |            |            |
|-----------------------------------------------------------------------------------------------------------------------------------------------------------------|----------------------------------------------------------------------------------------------------------|------------------------------------------------------------------------------------------------------------------------------------------------------------------------------------------------------------------------------------------------------------------|---|----|----|----|--------|-------------|------------|------------|------------|
| XP_01518212<br>9.1;XP_01518<br>2128.1;XP_01<br>5182127.1;XP<br>_015182126.1<br>;XP_0151821<br>25.1;XP_0151<br>82124.1;XP_0<br>15182123.1                        | XP_015182129.1;XP_015182128.1;XP_015182127.1;XP_015182126.1;XP_015182125.1;XP_015182124.1;XP_015182123.1 | XP_015182129.1 PREDICTED: farnesol dehydrogenase-like isoform X2 [Polistes dominula];XP_015182128.1 PREDICTED: farnesol dehydrogenase-like isoform X2 [Polistes dominula];XP_015182127.1 PREDICTED: farnesol dehydrogenase-like isoform X2 [Polistes dominula];X |   |    |    |    |        |             |            |            |            |
| XP_01518433<br>7.1                                                                                                                                              | XP_015184337.1                                                                                           | XP_015184337.1 PREDICTED: cofilin/actin-depolymerizing factor homolog [Polistes dominula]                                                                                                                                                                        | 1 | 13 | 13 | 13 | 16,832 | 68794000    | 3925700000 | 796260000  | 228260000  |
| XP_01518483<br>5.1                                                                                                                                              | XP_015184835.1                                                                                           | XP_015184835.1 PREDICTED: probable enoyl-CoA hydratase, mitochondrial [Polistes dominula]                                                                                                                                                                        | 1 | 13 | 13 | 13 | 32,211 | 2173800000  | 875590000  | 60768000   | 81028000   |
| sp Q7Z269.1 SP4_PO<br>LDO;NP_001310266.<br>1;AAP37412.1                                                                                                         | sp Q7Z269.1 SP4_PO<br>LDO;NP_001310266.<br>1;AAP37412.1                                                  | sp Q7Z269.1 SP4_PO LDO RecName: Full=Venom serine protease; AltName: Allergen=Pol d 4; Flags: Precursor;NP_001310266.1 venom serine protease precursor [Polistes dominula];AAP37412.1 venom serine protease precursor [Polistes dominula]                        | 3 | 14 | 14 | 14 | 30,804 | 26343000000 | 4189700000 | 5538900000 | 9578100000 |
| XP_01517251<br>0.1                                                                                                                                              | XP_015172510.1                                                                                           | XP_015172510.1 PREDICTED: probable transaldolase [Polistes dominula]                                                                                                                                                                                             | 1 | 14 | 14 | 14 | 40,533 | 90646000    | 1239400000 | 234610000  | 32754000   |
| XP_01517371<br>1.1;XP_01517<br>3710.1;XP_01<br>5173709.1;XP<br>_015173706.1<br>;XP_0151737<br>08.1                                                              | XP_015173711.1;XP_015173710.1;XP_015173709.1;XP_015173706.1                                              | XP_015173711.1 PREDICTED: dihydropyrimidinase isoform X3 [Polistes dominula];XP_015173710.1 PREDICTED: dihydropyrimidinase isoform X3 [Polistes dominula];XP_015173709.1 PREDICTED: dihydropyrimidinase isoform X3 [Polistes dominula];XP_015173706.1 PREDICTED: | 5 | 14 | 14 | 14 | 66,255 | 0           | 121010000  | 41245000   | 37702000   |
| XP_01517468<br>8.1;XP_01517<br>4687.1                                                                                                                           | XP_015174688.1;XP_015174687.1                                                                            | XP_015174688.1 PREDICTED: heat shock 70 kDa protein cognate 4-like [Polistes dominula];XP_015174687.1 PREDICTED: heat shock 70 kDa protein cognate 4-like [Polistes dominula]                                                                                    | 2 | 25 | 14 | 13 | 70,686 | 155030000   | 611450000  | 123920000  | 78875000   |
| XP_01517491<br>0.1;AEN6231<br>8.1                                                                                                                               | XP_015174910.1;AEN62318.1                                                                                | XP_015174910.1 PREDICTED: toll-like receptor 8 [Polistes dominula];AEN62318.1 IRP30, partial [Polistes dominula]                                                                                                                                                 | 2 | 14 | 14 | 14 | 37,282 | 1452000000  | 413800000  | 109330000  | 203310000  |
| XP_01517494<br>9.1                                                                                                                                              | XP_015174949.1                                                                                           | XP_015174949.1 PREDICTED: 60 kDa heat shock protein, mitochondrial-like [Polistes dominula]                                                                                                                                                                      | 1 | 14 | 14 | 14 | 60,922 | 297130000   | 28943000   | 0          | 12420000   |
| XP_01517997<br>4.1                                                                                                                                              | XP_015179974.1                                                                                           | XP_015179974.1 PREDICTED: prostaglandin reductase 1-like [Polistes dominula]                                                                                                                                                                                     | 1 | 14 | 14 | 14 | 38,653 | 1291400000  | 2654100000 | 301360000  | 224240000  |
| XP_01517155<br>5.1;XP_01517<br>1470.1;XP_01<br>5171394.1;XP<br>_015171223.1<br>;XP_0151711<br>34.1;XP_0151<br>71047.1;XP_0<br>15171638.1;X<br>P_015171313.<br>1 | XP_015171555.1;XP_015171470.1;XP_015171394.1;XP_015171223.1;XP_015171047.1;XP_015171638.1;XP_015171313.1 | XP_015171555.1 PREDICTED: titin isoform X5 [Polistes dominula];XP_015171470.1 PREDICTED: titin isoform X5 [Polistes dominula];XP_015171394.1 PREDICTED: titin isoform X4 [Polistes dominula];XP_015171223.1 PREDICTED: titin isoform X2 [Polistes dominula];XP_0 | 8 | 15 | 15 | 15 | 459,79 | 0           | 94031000   | 10414000   | 26453000   |

|                                                                 |                                                         |                                                                                                                                                                                                                                                                  |   |    |    |    |        |             |             |             |             |
|-----------------------------------------------------------------|---------------------------------------------------------|------------------------------------------------------------------------------------------------------------------------------------------------------------------------------------------------------------------------------------------------------------------|---|----|----|----|--------|-------------|-------------|-------------|-------------|
| XP_01518118<br>4.1                                              | XP_015181184.1                                          | XP_015181184.1 PREDICTED: transcription elongation factor SPT5 [Polistes dominula]                                                                                                                                                                               | 1 | 15 | 15 | 15 | 219,65 | 0           | 395330000   | 103120000   | 28090000    |
| XP_01518633<br>9.1;XP_01518<br>6347.1                           | XP_015186339.1;XP_<br>015186347.1                       | XP_015186339.1 PREDICTED: fumarylacetoacetate hydrolase domain-containing protein 2 isoform X1 [Polistes dominula];XP_015186347.1 PREDICTED: fumarylacetoacetate hydrolase domain-containing protein 2A isoform X2 [Polistes dominula]                           | 2 | 15 | 15 | 15 | 38,607 | 233320000   | 734310000   | 14146000    | 23991000    |
| XP_01518711<br>5.1                                              | XP_015187115.1                                          | XP_015187115.1 PREDICTED: phospholipase A1-like [Polistes dominula]                                                                                                                                                                                              | 1 | 20 | 15 | 15 | 38,417 | 4942200000  | 398740000   | 638950000   | 433790000   |
| XP_01518797<br>0.1;XP_01518<br>7969.1                           | XP_015187970.1;XP_<br>015187969.1                       | XP_015187970.1 PREDICTED: phosphoglucomutase [Polistes dominula];XP_015187969.1 PREDICTED: phosphoglucomutase [Polistes dominula]                                                                                                                                | 2 | 15 | 15 | 15 | 61,582 | 0           | 1230600000  | 59463000    | 104280000   |
| XP_01517760<br>8.1;XP_01517<br>7607.1;XP_01<br>5177606.1        | XP_015177608.1;XP_<br>015177607.1;XP_015<br>177606.1    | XP_015177608.1 PREDICTED: thioredoxin reductase 1, mitochondrial isoform X3 [Polistes dominula];XP_015177607.1 PREDICTED: thioredoxin reductase 1, mitochondrial isoform X2 [Polistes dominula];XP_015177606.1 PREDICTED: thioredoxin reductase 2, mitochondrial | 3 | 16 | 16 | 16 | 53,688 | 147900000   | 538380000   | 54443000    | 21668000    |
| XP_01518098<br>2.1;XP_01518<br>0981.1;XP_01<br>5180980.1        | XP_015180982.1;XP_<br>015180981.1;XP_015<br>180980.1    | XP_015180982.1 PREDICTED: NADP-dependent malic enzyme isoform X3 [Polistes dominula];XP_015180981.1 PREDICTED: NADP-dependent malic enzyme isoform X2 [Polistes dominula];XP_015180980.1 PREDICTED: NADP-dependent malic enzyme isoform X1 [Polistes dominula]   | 3 | 16 | 16 | 16 | 63,393 | 127850000   | 627440000   | 94924000    | 88633000    |
| XP_01518419<br>2.1                                              | XP_015184192.1                                          | XP_015184192.1 PREDICTED: dihydrolipoyl dehydrogenase, mitochondrial [Polistes dominula]                                                                                                                                                                         | 1 | 16 | 16 | 16 | 53,963 | 76208000    | 956450000   | 90920000    | 129710000   |
| XP_01518466<br>7.1                                              | XP_015184667.1                                          | XP_015184667.1 PREDICTED: probable aconitate hydratase, mitochondrial [Polistes dominula]                                                                                                                                                                        | 1 | 16 | 16 | 16 | 85,762 | 36729000    | 10127000    | 0           | 120190000   |
| spiP81656.2 V<br>A5_POLDO;<br>NP_00131026<br>5.1;AAT9501<br>0.1 | spiP81656.2 VA5_PO<br>LDO;NP_001310265.<br>1;AAT95010.1 | spiP81656.2 VA5_POLDO RecName: Full=Venom allergen 5; AltName: Full=Antigen 5; Short=Ag5; AltName: Full=Cysteine-rich venom protein; Short=CRVP; AltName: Allergen=Pol d 5; Flags: Precursor;NP_001310265.1 venom allergen 5 precursor [Polistes dominula];AAT95 | 3 | 17 | 17 | 17 | 25,446 | 35764000000 | 13009000000 | 13953000000 | 17954000000 |
| XP_01517155<br>7.1;XP_01517<br>1023.1                           | XP_015171557.1                                          | XP_015171557.1 PREDICTED: glutamyl aminopeptidase-like [Polistes dominula]                                                                                                                                                                                       | 2 | 17 | 17 | 17 | 110,62 | 0           | 237630000   | 34078000    | 8177200     |
| XP_01517599<br>4.1;XP_01517<br>6361.1                           | XP_015175994.1                                          | XP_015175994.1 PREDICTED: aldehyde dehydrogenase X, mitochondrial [Polistes dominula]                                                                                                                                                                            | 2 | 17 | 17 | 17 | 54,531 | 0           | 280830000   | 35644000    | 4778600     |
| XP_01517691<br>7.1;XP_01517<br>6916.1                           | XP_015176917.1;XP_<br>015176916.1                       | XP_015176917.1 PREDICTED: heat shock 70 kDa protein cognate 5 [Polistes dominula];XP_015176916.1 PREDICTED: heat shock 70 kDa protein cognate 5 [Polistes dominula]                                                                                              | 2 | 17 | 17 | 17 | 76,051 | 313350000   | 194630000   | 18000000    | 6859500     |
| XP_01517794<br>2.1                                              | XP_015177942.1                                          | XP_015177942.1 PREDICTED: arylphorin subunit beta-like [Polistes dominula]                                                                                                                                                                                       | 1 | 17 | 17 | 17 | 80,459 | 105510000   | 8983500000  | 1640600000  | 180190000   |
| XP_01518103<br>9.1                                              | XP_015181039.1                                          | XP_015181039.1 PREDICTED: stress-induced-phosphoprotein 1 [Polistes dominula]                                                                                                                                                                                    | 1 | 17 | 17 | 17 | 61,013 | 128090000   | 25957000    | 5331100     | 0           |

|                                                                                                         |                                                                                                          |                                                                                                                                                                                                                                                                                                                                                                                                                                                                                                                                                                                                                      |   |    |    |    |        |             |             |            |            |
|---------------------------------------------------------------------------------------------------------|----------------------------------------------------------------------------------------------------------|----------------------------------------------------------------------------------------------------------------------------------------------------------------------------------------------------------------------------------------------------------------------------------------------------------------------------------------------------------------------------------------------------------------------------------------------------------------------------------------------------------------------------------------------------------------------------------------------------------------------|---|----|----|----|--------|-------------|-------------|------------|------------|
| XP_01518499.1;XP_015184998.1;XP_015184997.1;XP_015184995.1;XP_015184994.1;XP_015184992.1;XP_015184996.1 | XP_015184999.1;XP_015184998.1;XP_015184997.1;XP_015184995.1;XP_015184994.1;XP_015184992.1;XP_015184996.1 | XP_015184999.1 PREDICTED: troponin T, skeletal muscle isoform X3 [Polistes dominula];XP_015184998.1 PREDICTED: troponin T, skeletal muscle isoform X3 [Polistes dominula];XP_015184997.1 PREDICTED: troponin T, skeletal muscle isoform X3 [Polistes dominula];XP_015184995.1 PREDICTED: troponin T, skeletal muscle isoform X3 [Polistes dominula];XP_015184994.1 PREDICTED: troponin T, skeletal muscle isoform X3 [Polistes dominula];XP_015184992.1 PREDICTED: troponin T, skeletal muscle isoform X3 [Polistes dominula];XP_015184996.1 PREDICTED: troponin T, skeletal muscle isoform X3 [Polistes dominula];X | 7 | 17 | 17 | 17 | 46,394 | 0           | 55325000    | 1779500000 | 19455000   |
| XP_015187594.1                                                                                          | XP_015187594.1                                                                                           | XP_015187594.1 PREDICTED: annexin B9-like [Polistes dominula]                                                                                                                                                                                                                                                                                                                                                                                                                                                                                                                                                        | 1 | 17 | 17 | 17 | 36,081 | 18339000    | 1614900000  | 55403000   | 44585000   |
| XP_015187606.1                                                                                          | XP_015187606.1                                                                                           | XP_015187606.1 PREDICTED: uncharacterized protein LOC107072309 [Polistes dominula]                                                                                                                                                                                                                                                                                                                                                                                                                                                                                                                                   | 1 | 17 | 17 | 17 | 101,8  | 251120000   | 82336000    | 0          | 0          |
| XP_015187119.1                                                                                          | XP_015187119.1                                                                                           | XP_015187119.1 PREDICTED: phospholipase A1-like [Polistes dominula]                                                                                                                                                                                                                                                                                                                                                                                                                                                                                                                                                  | 1 | 18 | 18 | 18 | 39,864 | 27324000000 | 0           | 3013100000 | 52552000   |
| XP_015188027.1                                                                                          | XP_015188027.1                                                                                           | XP_015188027.1 PREDICTED: arginine kinase [Polistes dominula]                                                                                                                                                                                                                                                                                                                                                                                                                                                                                                                                                        | 1 | 18 | 18 | 18 | 39,751 | 256610000   | 1422300000  | 473350000  | 1022600000 |
| XP_015177266.1                                                                                          | XP_015177266.1                                                                                           | XP_015177266.1 PREDICTED: uncharacterized protein LOC107066818 [Polistes dominula]                                                                                                                                                                                                                                                                                                                                                                                                                                                                                                                                   | 1 | 19 | 19 | 19 | 53,574 | 0           | 366220000   | 25599000   | 4737900    |
| XP_015178295.1                                                                                          | XP_015178295.1                                                                                           | XP_015178295.1 PREDICTED: muscle-specific protein 20 [Polistes dominula]                                                                                                                                                                                                                                                                                                                                                                                                                                                                                                                                             | 1 | 19 | 19 | 19 | 20,58  | 0           | 11809000000 | 5791300000 | 3102300000 |
| XP_015179722.1                                                                                          | XP_015179722.1                                                                                           | XP_015179722.1 PREDICTED: hyaluronidase [Polistes dominula]                                                                                                                                                                                                                                                                                                                                                                                                                                                                                                                                                          | 1 | 19 | 19 | 19 | 42,733 | 11219000000 | 7371900000  | 640100000  | 3794800000 |
| XP_015187948.1;XP_015187929.1;XP_015187939.1                                                            | XP_015187948.1;XP_015187929.1;XP_015187939.1                                                             | XP_015187948.1 PREDICTED: uncharacterized abhydrolase domain-containing protein DDB_G0269086-like isoform X3 [Polistes dominula];XP_015187929.1 PREDICTED: uncharacterized abhydrolase domain-containing protein DDB_G0269086-like isoform X1 [Polistes dominula];XP_015187939.1 PREDICTED: uncharacterized abhydrolase domain-containing protein DDB_G0269086-like isoform X1 [Polistes dominula]                                                                                                                                                                                                                   | 3 | 20 | 20 | 20 | 80,894 | 0           | 906760000   | 1167700000 | 594510000  |
| XP_015172727.1;XP_015172726.1                                                                           | XP_015172727.1;XP_015172726.1                                                                            | XP_015172727.1 PREDICTED: malate dehydrogenase, mitochondrial isoform X2 [Polistes dominula];XP_015172726.1 PREDICTED: malate dehydrogenase, mitochondrial isoform X1 [Polistes dominula]                                                                                                                                                                                                                                                                                                                                                                                                                            | 2 | 21 | 21 | 21 | 32,313 | 419930000   | 6440600000  | 811860000  | 437520000  |
| XP_015190254.1                                                                                          | XP_015190254.1                                                                                           | XP_015190254.1 PREDICTED: titin-like [Polistes dominula]                                                                                                                                                                                                                                                                                                                                                                                                                                                                                                                                                             | 1 | 21 | 21 | 21 | 358,19 | 0           | 377930000   | 65052000   | 62719000   |
| XP_015184463.1                                                                                          | XP_015184463.1                                                                                           | XP_015184463.1 PREDICTED: fructose-bisphosphate aldolase-like [Polistes dominula]                                                                                                                                                                                                                                                                                                                                                                                                                                                                                                                                    | 1 | 22 | 22 | 22 | 39,587 | 243280000   | 1285100000  | 39969000   | 1968400000 |
| XP_015176905.1                                                                                          | XP_015176905.1                                                                                           | XP_015176905.1 PREDICTED: esterase E4-like [Polistes dominula]                                                                                                                                                                                                                                                                                                                                                                                                                                                                                                                                                       | 1 | 23 | 23 | 22 | 65,577 | 7552200     | 3585600000  | 840770000  | 78810000   |
| XP_015188978.1;XP_015188979.1                                                                           | XP_015188978.1;XP_015188979.1                                                                            | XP_015188978.1 PREDICTED: pyruvate kinase-like isoform X1 [Polistes dominula];XP_015188979.1 PREDICTED: pyruvate kinase-like isoform X2 [Polistes dominula]                                                                                                                                                                                                                                                                                                                                                                                                                                                          | 2 | 24 | 24 | 24 | 57,371 | 54043000    | 2682000000  | 565040000  | 242010000  |
| XP_015177712.1                                                                                          | XP_015177712.1                                                                                           | XP_015177712.1 PREDICTED: heat shock 70 kDa protein cognate 4 [Polistes dominula]                                                                                                                                                                                                                                                                                                                                                                                                                                                                                                                                    | 1 | 28 | 28 | 16 | 71,216 | 751820000   | 5677000000  | 857300000  | 491210000  |
| XP_015179311.1                                                                                          | XP_015179311.1                                                                                           | XP_015179311.1 PREDICTED: aldose reductase-like [Polistes dominula]                                                                                                                                                                                                                                                                                                                                                                                                                                                                                                                                                  | 1 | 29 | 29 | 29 | 69,822 | 1163700000  | 1520700000  | 489390000  | 321100000  |
| XP_015177945.1                                                                                          | XP_015177945.1                                                                                           | XP_015177945.1 PREDICTED: arylphorin subunit alpha-like [Polistes dominula]                                                                                                                                                                                                                                                                                                                                                                                                                                                                                                                                          | 1 | 30 | 30 | 30 | 81,512 | 7137500     | 4385600000  | 2629400000 | 119260000  |

|                                                                                                                                          |                                                                                                                              |                                                                                                                                                                                                                                                                           |   |     |     |     |        |            |             |             |             |
|------------------------------------------------------------------------------------------------------------------------------------------|------------------------------------------------------------------------------------------------------------------------------|---------------------------------------------------------------------------------------------------------------------------------------------------------------------------------------------------------------------------------------------------------------------------|---|-----|-----|-----|--------|------------|-------------|-------------|-------------|
| sp Q6Q250.1 PA13_POLD<br>O;AAS67043.1                                                                                                    | sp Q6Q250.1 PA13_POLD<br>O;AAS67043.1                                                                                        | sp Q6Q250.1 PA13_POLD<br>RecName: Full=Phospholipase A1 3;<br>AltName: Allergen=Pol d 1; Flags: Precursor;AAS67043.1 venom<br>phospholipase A1 3 precursor, partial [Polistes dominula]                                                                                   | 2 | 32  | 32  | 0   | 35,019 | 1,7752E+11 | 6802200000  | 21546000000 | 67721000000 |
| XP_01517444<br>8.1;XP_01517<br>4447.1;XP_01<br>5174446.1;XP<br>_015174445.1                                                              | XP_015174448.1;XP_<br>015174447.1;XP_015<br>174446.1;XP_015174<br>445.1                                                      | XP_015174448.1 PREDICTED: venom dipeptidyl peptidase 4 [Polistes<br>dominula];XP_015174447.1 PREDICTED: venom dipeptidyl peptidase 4<br>[Polistes dominula];XP_015174446.1 PREDICTED: venom dipeptidyl<br>peptidase 4 [Polistes dominula];XP_015174445.1 PREDICTED: venom | 4 | 32  | 32  | 32  | 88,858 | 3762700000 | 645400000   | 128320000   | 41472000    |
| XP_01519033<br>9.1                                                                                                                       | XP_015190339.1                                                                                                               | XP_015190339.1 PREDICTED: vitellogenin-like [Polistes dominula]                                                                                                                                                                                                           | 1 | 33  | 33  | 33  | 201,78 | 108420000  | 227340000   | 161260000   | 46806000    |
| XP_01517544<br>8.1;XP_01517<br>5447.1;XP_01<br>5175446.1;XP<br>_015175445.1<br>;XP_0151754<br>44.1;XP_0151<br>75443.1;XP_0<br>15175450.1 | XP_015175448.1;XP_<br>015175447.1;XP_015<br>175446.1;XP_015175<br>445.1;XP_015175444.<br>1;XP_015175443.1;X<br>P_015175450.1 | XP_015175448.1 PREDICTED: filamin-A isoform X4 [Polistes<br>dominula];XP_015175447.1 PREDICTED: filamin-A isoform X3 [Polistes<br>dominula];XP_015175446.1 PREDICTED: filamin-A isoform X2 [Polistes<br>dominula];XP_015175445.1 PREDICTED: filamin-A isoform X1 [Poliste | 7 | 37  | 37  | 5   | 244,4  | 81708000   | 1163900000  | 459950000   | 312630000   |
| XP_01517192<br>7.1                                                                                                                       | XP_015171927.1                                                                                                               | XP_015171927.1 PREDICTED: transferrin [Polistes dominula]                                                                                                                                                                                                                 | 1 | 42  | 42  | 42  | 79,341 | 31985000   | 13059000000 | 2107400000  | 124540000   |
| XP_01518329<br>7.1                                                                                                                       | XP_015183297.1                                                                                                               | XP_015183297.1 PREDICTED: twitchin isoform X8 [Polistes dominula]                                                                                                                                                                                                         | 1 | 43  | 43  | 23  | 937,43 | 0          | 582950000   | 463310000   | 462960000   |
| XP_01519155<br>9.1                                                                                                                       | XP_015191559.1                                                                                                               | XP_015191559.1 PREDICTED: nuclear anchorage protein 1-like [Polistes<br>dominula]                                                                                                                                                                                         | 1 | 52  | 52  | 52  | 694,62 | 13260000   | 956000000   | 174350000   | 138400000   |
| XP_01518465<br>5.1                                                                                                                       | XP_015184655.1                                                                                                               | XP_015184655.1 PREDICTED: apolipophorins [Polistes dominula]                                                                                                                                                                                                              | 1 | 111 | 111 | 111 | 377,7  | 200680000  | 2985600000  | 10125000    | 51857000    |
| XP_01519178<br>8.1                                                                                                                       | XP_015191788.1                                                                                                               | XP_015191788.1 PREDICTED: titin [Polistes dominula]                                                                                                                                                                                                                       | 1 | 129 | 129 | 129 | 1594,7 | 0          | 1102200000  | 1876900000  | 1598000000  |
